# Supplementary material for: A Recent Prevalence of Hepatitis B Virus (HBV) Genotypes and Subtypes in Asia: A Systematic Review and Meta-Analysis
Source: MDPI journal article supplement (doi:10.3390/healthcare11071011), 2023-04-01
Supplement: s1 [file s1]

Table S9. Subgroup analysis for comparison of prevalence of HBV genotypes in Asia across targeted gene(s) of detection

| Target gene | Number of studies | Prevalence (%) | 95% CI       | $I^2$ (%) | Q       | Heterogeneity test |        |
|-------------|-------------------|----------------|--------------|-----------|---------|--------------------|--------|
|             |                   |                |              |           |         | DF                 | P      |
| Genotype A  |                   |                |              |           |         |                    |        |
| P           | 10                | 2.6            | 0.9 – 7.7    | 79.5      | 43.90   | 9                  | <0.001 |
| S           | 135               | 3.2            | 2.4 – 4.2    | 92.73     | 1842.33 | 134                | <0.001 |
| S and C     | 38                | 2.8            | 1.7 – 4.4    | 89.01     | 336.53  | 37                 | <0.001 |
| C           | 6                 | 14.8           | 8.0 – 25.8   | 73.62     | 18.96   | 5                  | 0.002  |
| P and C     | 1                 | 0.3            | 0.0 – 4.6    | -         | -       | -                  | -      |
| P, S and C  | 5                 | 0.7            | 0.2 – 3.1    | 64.59     | 11.30   | 4                  | 0.023  |
| P and S     | 9                 | 4.1            | 1.5 – 10.6   | 93.33     | 119.88  | 8                  | <0.001 |
| S, C and X  | 1                 | 0.6            | 0.0 – 8.4    | -         | -       | -                  | -      |
| X           | 2                 | 0.4            | 0.1 – 2.6    | 0.00      | 0.098   | 1                  | 0.754  |
| Overall     | 207               | 3.1            | 0.1 – 2.6    | 91.79     | 2507.63 | 206                | <0.001 |
| Genotype B  |                   |                |              |           |         |                    |        |
| P           | 10                | 2.5            | 0.2 – 20.4   | 94.96     | 178.43  | 9                  | <0.001 |
| S           | 135               | 20.1           | 16.9 – 23.7  | 97.46     | 5271.55 | 134                | <0.001 |
| S and C     | 38                | 14.3           | 10.5 – 19.1  | 95.5      | 822.79  | 37                 | <0.001 |
| C           | 6                 | 7.6            | 1.2 – 35.6   | 89.94     | 49.70   | 5                  | <0.001 |
| P and C     | 1                 | 0.3            | 0.00 – 4.6   | -         | -       | -                  | -      |
| P, S and C  | 5                 | 28.9           | 18.1 – 42.8  | 89.95     | 39.78   | 4                  | <0.001 |
| P and S     | 9                 | 26.2           | 14.0 – 43.6  | 97.87     | 376.17  | 8                  | <0.001 |
| S, C and X  | 1                 | 0.6            | 0.0 – 8.4    | -         | -       | -                  | -      |
| X           | 2                 | 15.5           | 1.9 – 63.0   | 97.09     | 34.33   | 1                  | <0.001 |
| Overall     | 207               | 17.8           | 15.5 – 20.4  | 97.26     | 7524.23 | 206                | <0.001 |
| Genotype C  |                   |                |              |           |         |                    |        |
| P           | 10                | 10.8           | 4.5 – 24.0   | 90.29     | 92.73   | 9                  | <0.001 |
| S           | 135               | 30.2           | 26.2 – 34.5  | 97.56     | 5500.91 | 134                | <0.001 |
| S and C     | 38                | 37.1           | 29.0 – 46.0  | 96.82     | 1163.0  | 37                 | <0.001 |
| C           | 6                 | 30.6           | 9.8 – 64.1   | 95.77     | 118.34  | 5                  | <0.001 |
| P and C     | 1                 | 0.3            | 0.00 – 4.6   | -         | -       | -                  | -      |
| P, S and C  | 5                 | 36.6           | 21.0 – 55.6  | 93.96     | 66.19   | 4                  | <0.001 |
| P and S     | 9                 | 37.6           | 18.0 – 62.3  | 98.62     | 579.36  | 8                  | <0.001 |
| S, C and X  | 1                 | 0.6            | 0.00 – 8.4   | -         | -       | -                  | -      |
| X           | 2                 | 82.6           | 40.3 – 97.1  | 96.79     | 31.15   | 1                  | <0.001 |
| Overall     | 207               | 30.9           | 27.5 – 34.5  | 97.57     | 8476.52 | 206                | <0.001 |
| Genotype D  |                   |                |              |           |         |                    |        |
| P           | 10                | 79.0           | 53.8 – 92.4  | 90.16     | 91.45   | 9                  | <0.001 |
| S           | 135               | 13.9           | 10.1 – 18.8  | 97.0      | 4467.03 | 134                | <0.001 |
| S and C     | 38                | 13.9           | 6.9 – 26.1   | 98.29     | 2167.86 | 37                 | <0.001 |
| C           | 6                 | 44.5           | 24.1 – 67.0  | 88.47     | 43.38   | 5                  | <0.001 |
| P and C     | 1                 | 99.7           | 95.4 – 100.0 | -         | -       | -                  | -      |
| P, S and C  | 5                 | 25.7           | 0.6 – 95.0   | 94.86     | 77.75   | 4                  | <0.001 |
| P and S     | 9                 | 1.6            | 0.1 – 16.5   | 98.11     | 422.56  | 8                  | <0.001 |
| S, C and X  | 1                 | 99.4           | 91.6 – 100.0 | -         | -       | -                  | -      |
| X           | 2                 | 0.4            | 0.1 – 2.6    | 0.00      | 0.098   | 1                  | 0.754  |
| Overall     | 207               | 15.4           | 11.8 – 19.8  | 97.37     | 7819.59 | 206                | <0.001 |
| Genotype E  |                   |                |              |           |         |                    |        |
| P           | 10                | 0.8            | 0.3 – 2.0    | 0.00      | 6.11    | 9                  | 0.729  |
| S           | 135               | 0.6            | 0.4 – 0.8    | 41.15     | 227.69  | 134                | <0.001 |
| S and C     | 38                | 0.5            | 0.3 – 0.8    | 0.00      | 31.52   | 37                 | 0.723  |
| C           | 6                 | 0.9            | 0.3 – 2.9    | 0.00      | 3.75    | 5                  | 0.586  |
| P and C     | 1                 | 0.3            | 0.00 – 4.6   | -         | -       | -                  | -      |
| P, S and C  | 5                 | 0.3            | 0.1 – 1.1    | 0.00      | 3.37    | 4                  | 0.500  |
| P and S     | 9                 | 0.4            | 0.2 – 1.1    | 23.55     | 10.47   | 8                  | 0.234  |
| S, C and X  | 1                 | 0.6            | 0.00 – 8.4   | -         | -       | -                  | -      |
| X           | 2                 | 0.4            | 0.1 – 2.6    | 0.00      | 0.098   | 1                  | 0.754  |
| Overall     | 207               | 0.6            | 0.5 – 0.7    | 29.79     | 29340   | 206                | <0.001 |
| Genotype F  |                   |                |              |           |         |                    |        |
| P           | 10                | 0.8            | 0.3 – 0.20   | 0.00      | 6.11    | 9                  | 0.729  |
| S           | 135               | 0.6            | 0.4 – 0.9    | 80.14     | 674.59  | 134                | <0.001 |
| S and C     | 38                | 0.5            | 0.3 – 0.8    | 0.00      | 31.84   | 37                 | 0.709  |
| C           | 6                 | 0.9            | 0.3 – 2.9    | 0.00      | 3.75    | 5                  | 0.586  |
| P and C     | 1                 | 0.3            | 0.1 – 1.1    | -         | -       | -                  | -      |

|            |     |     |            |       |        |     |        |
|------------|-----|-----|------------|-------|--------|-----|--------|
| P, S and C | 5   | 0.3 | 0.1 – 1.1  | 0.00  | 3.356  | 4   | 0.500  |
| P and S    | 9   | 0.3 | 0.1 – 0.8  | 0.72  | 8.06   | 8   | 0.428  |
| S, C and X | 1   | 0.6 | 0.00 – 8.4 | -     | -      | -   | -      |
| X          | 2   | 0.4 | 0.1 – 2.6  | 0.00  | 0.098  | 1   | 0.754  |
| Overall    | 207 | 0.6 | 0.4 – 0.8  | 75.26 | 832.73 | 206 | <0.001 |
| Genotype G |     |     |            |       |        |     |        |
| P          | 10  | 0.9 | 0.4 – 2.1  | 0.00  | 6.04   | 9   | 0.736  |
| S          | 135 | 0.5 | 0.4 – 0.7  | 5.19  | 141.34 | 134 | 0.315  |
| S and C    | 38  | 0.6 | 0.4 – 0.9  | 1.06  | 37.40  | 37  | 0.451  |
| C          | 6   | 0.9 | 0.3 – 2.9  | 0.00  | 3.75   | 5   | 0.586  |
| P and C    | 1   | 0.3 | 0.00 – 4.6 | -     | -      | -   | -      |
| P, S and C | 5   | 0.3 | 0.00 – 1.1 | 0.00  | 3.36   | 4   | 0.500  |
| P and S    | 9   | 0.3 | 0.1 – 0.8  | 0.72  | 8.06   | 8   | 0.428  |
| S, C and X | 1   | 0.6 | 0.0 – 8.4  | -     | -      | -   | -      |
| X          | 2   | 0.4 | 0.1 – 2.6  | 0.00  | 0.098  | 1   | 0.754  |
| Overall    | 207 | 0.6 | 0.5 – 0.7  | 0.00  | 205.13 | 206 | 0.504  |
| Genotype H |     |     |            |       |        |     |        |
| P          | 10  | 0.8 | 0.3 – 2.0  | 0.00  | 6.11   | 9   | 0.729  |
| S          | 135 | 0.5 | 0.4 – 0.6  | 0.00  | 103.58 | 134 | 0.976  |
| S and C    | 38  | 0.5 | 0.3 – 0.8  | 0.00  | 32.52  | 37  | 0.679  |
| C          | 6   | 0.9 | 0.3 – 2.9  | 0.00  | 3.75   | 5   | 0.586  |
| P and C    | 1   | 0.3 | 0.00 – 4.6 | -     | -      | -   | -      |
| P, S and C | 5   | 0.3 | 0.1 – 1.1  | 0.00  | 3.36   | 4   | 0.500  |
| P and S    | 9   | 0.4 | 0.2 – 1.0  | 12.18 | 9.11   | 8   | 0.333  |
| S, C and X | 1   | 0.6 | 0.00 – 8.4 | -     | -      | -   | -      |
| X          | 2   | 0.4 | 0.1 – 2.6  | 0.00  | 0.098  | 1   | 0.754  |
| Overall    | 207 | 0.5 | 0.4 – 0.6  | 0.00  | 162.06 | 206 | 0.989  |
| Genotype I |     |     |            |       |        |     |        |
| P          | 10  | 0.8 | 0.3 – 2.0  | 0.00  | 6.11   | 9   | 0.729  |
| S          | 135 | 0.6 | 0.4 – 0.7  | 0.00  | 114.47 | 134 | 0.888  |
| S and C    | 38  | 0.5 | 0.3 – 0.8  | 0.00  | 30.55  | 37  | 0.764  |
| C          | 6   | 0.9 | 0.3 – 2.9  | 0.00  | 3.75   | 5   | 0.586  |
| P and C    | 1   | 0.3 | 0.0 – 4.6  | -     | -      | -   | -      |
| P, S and C | 5   | 1.6 | 1.0 – 2.4  | 0.00  | 3.69   | 4   | 0.449  |
| P and S    | 9   | 0.3 | 0.1 – 0.8  | 0.72  | 8.06   | 8   | 0.428  |
| S, C and X | 1   | 0.6 | 0.00 – 8.4 | -     | -      | -   | -      |
| X          | 2   | 0.4 | 0.1 – 2.6  | 0.00  | 0.098  | 1   | 0.754  |
| Overall    | 207 | 0.6 | 0.5 – 0.8  | 0.00  | 190.91 | 206 | 0.767  |

P: Polymerase gene, S: Surface protein gene, C: Core protein gene, X: Regulatory protein gene

| name of auth   | year of public | country    | target region | method of ge  | total genotype A |     |
|----------------|----------------|------------|---------------|---------------|------------------|-----|
| Abbas et al    | 2009           | Iran       | P             | sequencing    | 6                | 0   |
| Abbasian et a  | 2021           | Iran       | P             | sequencing    | 8                | 0   |
| Abdulkadirov   | 2020           | Uzbekstan  | S             | multiplex PCR | 113              | 4   |
| Aftab et al    | 2018           | Pakistan   | S             | sequencing    | 39               | 13  |
| Aghakhani et   | 2009           | Iran       | S             | sequencing    | 40               | 0   |
| Alam. et al    | 2007           | Pakistan   | S             | sequencing    | 56               | 15  |
| Alam et al     | 2007           | Pakistan   | S             | multiplex PCR | 110              | 5   |
| Alavian et al  | 2006           | Iran       | P             | LIPA          | 109              | 0   |
| Anvari et al   | 2016           | Iran       | S             | RFLP          | 2                | 0   |
| Andi. et al    | 2009           | Indonesia  | S             | sequencing    | 214              | 131 |
| Andi et al     | 2009           | Indonesia  | S             | sequencing    | 171              | 0   |
| Anis et al     | 2008           | Tajikistan | S and C       | sequencing    | 51               | 3   |
| Anvari et al   | 2013           | Iran       | S             | sequencing    | 29               | 0   |
| Aono et al     | 2007           | Japan      | S             | sequencing    | 48               | 11  |
| Arabadadi et   | 2011           | Iran       | S             | sequencing    | 57               | 0   |
| Arifur et al   | 2016           | Bangledesh | S             | sequencing    | 17               | 3   |
| Arup et al     | 2006           | India      | C             | RFLP          | 236              | 66  |
| Ashrafali et a | 2014           | India      | S             | sequencing    | 295              | 53  |
| Atalay et al   | 2011           | Turkey     | S             | sequencing    | 107              | 0   |
| Attaran et al  | 2017           | Iran       | P and C       | sequencing    | 166              | 0   |
| Avik. et al    | 2013           | India      | P             | sequencing    | 47               | 4   |
| Avik et al     | 2009           | India      | S and C       | RFLP          | 141              | 29  |
| Babana et al   | 2017           | Pakistan   | S             | sequencing    | 337              | 9   |
| Bhagirathi et  | 2014           | India      | S and C       | sequencing    | 17               | 0   |
| Borkakoty et   | 2008           | India      | S             | sequencing    | 29               | 15  |
| Bozdayo et al  | 2003           | Turkey     | S             | RFLP          | 58               | 0   |
| Brij et al     | 2018           | India      | S             | sequencing    | 17               | 0   |
| Bui et al      | 2017           | Vietnam    | S and C       | sequencing    | 135              | 0   |
| Chamni et al   | 2014           | Thailand   | S and C       | sequencing    | 47               | 0   |
| Chan et al     | 2002           | China      | S             | sequencing    | 42               | 0   |
| Chandana et    | 2011           | India      | S             | sequencing    | 71               | 6   |
| Choudhardy et  | 2008           | Pakistan   | S             | sequencing    | 236              | 2   |
| Ciftci et al   | 2012           | Turkey     | P, S and C    | sequencing    | 63               | 0   |
| Cuong et al    | 2011           | Vietnam    | S             | sequencing    | 113              | 0   |
| D-D Li et al   | 2010           | China      | P and S       | multiplex PCR | 376              | 0   |
| Davod et al    | 2019           | Iran       | S, C and X    | sequencing    | 87               | 0   |
| Debraj et al   | 2014           | India      | S             | sequencing    | 59               | 19  |
| Ding. et al    | 2004           | China      | S             | RFLP          | 166              | 0   |
| Ding.. et al   | 2013           | China      | S             | RDB hybridiza | 250              | 0   |
| Ding et al.    | 2002           | China      | S             | sequencing    | 141              | 6   |
| Ding et al     | 2001           | China      | S and C       | RFLP          | 220              | 3   |
| Dong. et al    | 2009           | China      | S and C       | sequencing    | 51               | 0   |

|                  |                 |            |               |      |    |
|------------------|-----------------|------------|---------------|------|----|
| Dong.. et al     | 2021 China      | S and C    | sequencing    | 649  | 0  |
| Dong et al       | 2009 China      | S          | sequencing    | 692  | 6  |
| Du et al         | 2006 China      | S          | LIPA          | 121  | 0  |
| Edward et al     | 2005 China      | S          | multiplex PCR | 15   | 0  |
| Emekdas et al    | 2012 Turkey     | S and C    | RFLP          | 34   | 0  |
| Etsuro et al     | 2001 Japan      | S          | RFLP          | 720  | 12 |
| Fang et al       | 2004 China      | S and C    | sequencing    | 36   | 0  |
| Farah et al      | 2014 Azerbaijan | S          | LIPA          | 103  | 6  |
| Farooq et al     | 2021 Pakistan   | P          | sequencing    | 98   | 21 |
| Fei et al        | 2009 China      | S          | sequencing    | 127  | 0  |
| Fujie et al      | 2001 Japan      | S          | RFLP          | 109  | 3  |
| Fujiko et al     | 2015 Indonesia  | S          | sequencing    | 47   | 0  |
| Fuminaka et al   | 2002 Thailand   | S          | LIPA          | 107  | 0  |
| Furusyo et al    | 2004 Japan      | S          | sequencing    | 409  | 0  |
| Ghani et al      | 2011 Pakistan   | S          | multiplex PCR | 173  | 43 |
| Gollapudi et al  | 2008 India      | S and C    | sequencing    | 14   | 6  |
| Gu et al         | 2004 China      | S          | multiplex PCR | 464  | 24 |
| Haimanti et al   | 2014 India      | S and C    | sequencing    | 34   | 0  |
| Haixia et al     | 2013 China      | S          | sequencing    | 7    | 0  |
| Hakim et al      | 2016 Pakistan   | S and C    | sequencing    | 180  | 0  |
| Han et al        | 2009 China      | S          | sequencing    | 255  | 0  |
| Hani et al       | 2008 Jordan     | S          | LIPA          | 70   | 0  |
| Hayashi et al    | 2007 Japan      | P and S    | sequencing    | 246  | 30 |
| Hideaki et al    | 2002 Uzbekistan | S          | RFLP          | 54   | 7  |
| Hong mei et al   | 2015 China      | P, S and C | sequencing    | 1148 | 1  |
| Hooi et al       | 2005 Malaysia   | S          | sequencing    | 6    | 0  |
| Hu et al         | 2004 China      | S          | RFLP          | 424  | 0  |
| Hudu et al       | 2018 Malaysia   | S          | sequencing    | 82   | 0  |
| Hyun-Ju et al    | 2007 Korea      | S          | sequencing    | 209  | 0  |
| Inui et al       | 2007 Japan      | S          | sequencing    | 116  | 0  |
| Ivana et al      | 2013 Serbia     | S          | sequencing    | 162  | 23 |
| Jagdish et al    | 2020 India      | S          | sequencing    | 67   | 20 |
| Jin et al        | 2010 China      | X          | sequencing    | 182  | 0  |
| Kailash et al    | 2011 India      | S          | multiplex PCR | 150  | 81 |
| Kaklikkaya et al | 2012 Turkey     | S          | RFLP          | 125  | 0  |
| Kamol et al      | 2007 Thailand   | S          | sequencing    | 147  | 2  |
| Kana et al       | 2007 Japan      | S          | RFLP          | 508  | 9  |
| Karimi et al     | 2014 Iran       | S          | multiplex PCR | 23   | 6  |
| Kaya et al       | 2007 Turkey     | S          | LIPA          | 124  | 6  |
| Kazuhiko et al   | 2009 Vietnam    | S and C    | sequencing    | 27   | 0  |
| kikuchi et al    | 2000 Japan      | P, S and C | sequencing    | 310  | 8  |
| Kobayashi et al  | 2002 Japan      | S          | LIPA          | 48   | 13 |
| Komatsu et al    | 2015 Japan      | S          | LIPA          | 261  | 8  |



|                |                 |         |               |      |    |
|----------------|-----------------|---------|---------------|------|----|
| Kwon et al     | 2018 Korea      | S and C | sequencing    | 22   | 0  |
| Kyaw et al     | 2020 Myanmar    | S       | sequencing    | 153  | 0  |
| Leblebicioglu  | 2004 Turkey     | S       | RFLP          | 147  | 0  |
| Lee et al      | 2003 Taiwan     | S       | RFLP          | 265  | 3  |
| Lei et al      | 2005 China      | S       | multiplex PCR | 182  | 0  |
| Li et al       | 2010 China      | X       | sequencing    | 97   | 0  |
| Li. et al      | 2011 China      | P and S | sequencing    | 1301 | 0  |
| Li ..et al     | 2011 China      | S and C | sequencing    | 218  | 0  |
| Li et al.      | 2007 China      | S       | multiplex PCR | 180  | 0  |
| Li et al..     | 2006 China      | S       | multiplex PCR | 142  | 0  |
| Lin et al      | 2007 Taiwan     | S       | sequencing    | 125  | 0  |
| Liu. et al     | 2012 China      | S       | multiplex PCR | 208  | 9  |
| Liu.. et al    | 2004 Taiwan     | C       | RFLP          | 17   | 0  |
| Liu et al.     | 2002 Taiwan     | S       | RFLP          | 85   | 1  |
| Liu et al      | 2010 China      | P and S | sequencing    | 5    | 0  |
| Lu. et al      | 2007 China      | S       | sequencing    | 90   | 0  |
| Lu.. et al     | 2007 China      | S       | multiplex PCR | 127  | 0  |
| Lu et al       | 2011 China      | S       | multiplex PCR | 36   | 0  |
| Lusida et al   | 2003 Indonesia  | S       | LIPA          | 54   | 0  |
| Ma et al       | 2011 China      | S and C | sequencing    | 100  | 0  |
| Mahmood et     | 2016 Pakistan   | S and C | multiplex PCR | 715  | 55 |
| Manamperi e    | 2011 Sri Lanka  | S       | multiplex PCR | 25   | 2  |
| Matsuura et ;  | 2009 Japan      | S       | RFLP          | 1271 | 44 |
| Modhusudon     | 2016 Bangladesh | S       | sequencing    | 19   | 0  |
| Mojiri et al   | 2008 Iran       | S       | sequencing    | 89   | 0  |
| Mousavi. et a  | 2014 Iran       | S       | RFLP          | 17   | 0  |
| Mousavi et al  | 2014 Iran       | S       | sequencing    | 122  | 0  |
| Nei et al      | 2012 China      | S       | sequencing    | 556  | 0  |
| Neisi et al    | 2011 iran       | S and C | sequencing    | 48   | 0  |
| Nguyen et al   | 2008 China      | S       | sequencing    | 199  | 2  |
| Ni et al       | 2004 Taiwan     | S       | multiplex PCR | 460  | 0  |
| Norouzi et al  | 2012 Iran       | S       | sequencing    | 19   | 0  |
| Ogawa et al    | 2002 Japan      | S       | sequencing    | 25   | 14 |
| Oguzoglu et a  | 2001 Turkey     | S       | RFLP          | 48   | 5  |
| Onganar et     | 2006 Turkey     | S       | RFLP          | 50   | 6  |
| Ozdemir et al  | 2005 Turkey     | S       | sequencing    | 54   | 0  |
| Panicker et al | 2021 India      | S       | sequencing    | 144  | 8  |
| Parichat et al | 2015 Thailand   | S and C | sequencing    | 111  | 0  |
| Pattaratida et | 2010 Thailand   | S and C | sequencing    | 224  | 1  |
| Paudel et al   | 2015 Nepal      | S       | sequencing    | 42   | 17 |
| Perumal et al  | 2004 India      | C       | RFLP          | 167  | 30 |
| Pinarbasi et a | 2008 Turkey     | S and C | sequencing    | 13   | 0  |
| Prapan et al   | 2008 Thailand   | P       | multiplex PCR | 53   | 0  |

|                   |                  |            |                   |      |     |
|-------------------|------------------|------------|-------------------|------|-----|
| Premashis et al   | 2021 India       | S          | sequencing        | 655  | 34  |
| Priyo et al       | 2016 Indonesia   | S          | sequencing        | 61   | 0   |
| Rafatpanah et al  | 2008 Iran        | S          | sequencing        | 70   | 0   |
| Rana et al        | 2019 Iraq        | S          | multiplex PCR     | 186  | 20  |
| Retno et al       | 1991 Indonesia   | S          | sequencing        | 47   | 4   |
| Saeeda. et al     | 2008 Pakistan    | S          | sequencing        | 201  | 47  |
| Saeeda et al      | 2007 Pakistan    | S and C    | sequencing        | 295  | 60  |
| Sahapat et al     | 2012 Thailand    | S          | sequencing        | 15   | 0   |
| Said et al        | 2014 Oman        | P and S    | sequencing        | 170  | 32  |
| Saif et al        | 2017 Bangladesh  | S and C    | sequencing        | 53   | 10  |
| Saket. et al      | 2006 India       | S and C    | RFLP              | 160  | 12  |
| Saket et al       | 2006 India       | S          | RFLP              | 100  | 16  |
| Salman et al      | 2019 India       | S and C    | sequencing        | 17   | 6   |
| Samad et al       | 2009 Iran        | S          | multiplex PCR     | 125  | 0   |
| Santosh et al     | 2006 Nepal       | S          | sequencing        | 71   | 16  |
| Sayan & Dogan     | 2012 Turkey      | P          | sequencing        | 94   | 0   |
| Serin et al       | 2005 Turkey      | S          | sequencing        | 47   | 0   |
| Shahnaz et al     | 2018 Iran        | S          | sequencing        | 26   | 0   |
| Shamima et al     | 2017 Bangladesh  | S          | multiplex PCR     | 4    | 2   |
| Shen et al        | 2015 China       | P, S and C | sequencing        | 57   | 0   |
| Shi et al         | 2012 China       | C          | sequencing        | 89   | 0   |
| Smita et al       | 2020 Nepal       | S and C    | sequencing        | 56   | 4   |
| Sobia et al       | 2011 Afghanistan | S          | multiplex PCR     | 161  | 33  |
| Song. et al       | 2005 China       | S          | sequencing        | 480  | 8   |
| Song et al        | 2006 China       | S          | RDB hybridization | 96   | 0   |
| Srey et al        | 2006 Cambodia    | S          | sequencing        | 22   | 0   |
| Su et al          | 2020 China       | S          | sequencing        | 369  | 0   |
| Suda et al        | 2012 Thailand    | S and C    | sequencing        | 86   | 0   |
| Sugauchi et al    | 2006 Japan       | S and C    | RFLP              | 485  | 92  |
| Sunbul and Levent | 2005 Turkey      | P, S and C | RFLP              | 78   | 0   |
| Sunbul et al      | 2003 Turkey      | S          | RFLP              | 86   | 0   |
| Suzuki et al      | 2003 Japan       | S and C    | sequencing        | 234  | 8   |
| Swati et al       | 2003 India       | S          | sequencing        | 62   | 5   |
| Takako et al      | 2009 Indonesia   | S          | sequencing        | 21   | 0   |
| Talal et al       | 2004 Yemen       | C          | sequencing        | 26   | 4   |
| Tamada et al      | 2011 Japan       | S          | sequencing        | 547  | 136 |
| Tanaka et al      | 2009 Japan       | S          | sequencing        | 1887 | 106 |
| Tang et al        | 2007 China       | S          | sequencing        | 400  | 0   |
| Tao et al         | 2019 China       | S          | RDB hybridization | 1204 | 0   |
| Thanh et al       | 2005 Vietnam     | S          | sequencing        | 38   | 0   |
| Torii et al       | 2013 Japan       | S          | sequencing        | 10   | 3   |
| Tran et al        | 2008 Cambodia    | C          | sequencing        | 12   | 0   |
| Usuda et al       | 1999 Japan       | S          | LIPA              | 507  | 24  |

|                |                |         |               |       |      |
|----------------|----------------|---------|---------------|-------|------|
| Wada et al     | 2014 Japan     | S       | sequencing    | 90    | 27   |
| Wahyuni et al  | 2019 Indonesia | S       | sequencing    | 41    | 0    |
| Wang. et al    | 2014 China     | S       | sequencing    | 71    | 0    |
| Wang.. et al   | 2012 China     | P and S | sequencing    | 142   | 0    |
| Wang et al     | 2018 China     | S       | sequencing    | 73    | 0    |
| Wei et al      | 2015 China     | S       | sequencing    | 6817  | 0    |
| Wen and Tan    | 2004 China     | S       | multiplex PCR | 220   | 0    |
| Wu et al       | 2012 China     | S       | LIPA          | 319   | 0    |
| Xia et al      | 2001 China     | S and C | sequencing    | 280   | 0    |
| Xiang et al    | 2012 China     | S       | sequencing    | 112   | 0    |
| Xin et al      | 2002 China     | S       | RFLP          | 135   | 6    |
| Yan. et al     | 2010 China     | S       | sequencing    | 60    | 0    |
| yahya et al    | 2010 Iran      | S       | sequencing    | 100   | 0    |
| Yan et al      | 2015 China     | P and S | multiplex PCR | 258   | 11   |
| Yanag et al    | 2017 China     | S       | sequencing    | 178   | 0    |
| Yashwant et al | 2017 India     | P       | sequencing    | 98    | 4    |
| Ye. et al      | 2017 China     | S       | sequencing    | 9     | 0    |
| Ye et al       | 2021 China     | S and C | sequencing    | 14    | 0    |
| Yeh et al      | 2004 Taiwan    | S       | RFLP          | 213   | 23   |
| Yin et al      | 2010 China     | S and C | sequencing    | 3013  | 0    |
| You et al      | 2008 China     | P and S | RDB hybridiza | 126   | 0    |
| youyun et al   | 2016 China     | P       | LIPA          | 269   | 0    |
| Zaatari et al  | 2007 Lebanon   | S       | RFLP          | 11    | 0    |
| Zang. et al    | 2009 China     | S and C | sequencing    | 269   | 0    |
| Zang et al     | 2015 China     | S       | sequencing    | 1221  | 0    |
| Zeng et al     | 2005 China     | S and C | sequencing    | 1096  | 13   |
| Zhang et al    | 2018 China     | S       | sequencing    | 232   | 0    |
| Zhao et al     | 2001 China     | S and C | RDB hybridiza | 20    | 0    |
| Zhili et al    | 2014 China     | S       | multiplex PCR | 1124  | 0    |
| Zhong et al    | 2005 China     | S and C | LIPA          | 131   | 0    |
| Zhu et al      | 2008 China     | S       | multiplex PCR | 733   | 0    |
| Zhu. et al     | 2008 China     | S       | sequencing    | 166   | 0    |
| Zhu.. et al    | 2015 China     | S and C | sequencing    | 223   | 0    |
| Zhuang et al   | 2007 China     | P and S | RDB hybridiza | 117   | 48   |
| Zohreh         | 2013 Iran      | P       | sequencing    | 134   | 0    |
| Zunaira et al  | 2010 Pakistan  | S       | sequencing    | 269   | 43   |
|                |                |         |               | 49279 | 1786 |

| B   | C   | D   | E   | F | G | H |   |
|-----|-----|-----|-----|---|---|---|---|
|     | 0   | 0   | 6   | 0 | 0 | 0 | 0 |
|     | 0   | 0   | 7   | 0 | 0 | 0 | 0 |
|     | 0   | 0   | 109 | 0 | 0 | 0 | 0 |
|     | 0   | 0   | 26  | 0 | 0 | 0 | 0 |
|     | 0   | 0   | 40  | 0 | 0 | 0 | 0 |
|     | 0   | 0   | 35  | 0 | 0 | 0 | 0 |
| 27  | 0   | 0   | 66  | 0 | 0 | 0 | 0 |
| 0   | 0   | 0   | 109 | 0 | 0 | 0 | 0 |
| 0   | 0   | 0   | 2   | 0 | 0 | 0 | 0 |
| 54  | 2   | 0   | 0   | 0 | 0 | 0 | 0 |
| 126 | 45  | 0   | 0   | 0 | 0 | 0 | 0 |
| 0   | 0   | 48  | 0   | 0 | 0 | 0 | 0 |
| 0   | 0   | 29  | 0   | 0 | 0 | 0 | 0 |
| 11  | 26  | 0   | 0   | 0 | 0 | 0 | 0 |
| 0   | 0   | 57  | 0   | 0 | 0 | 0 | 0 |
| 0   | 6   | 4   | 0   | 0 | 0 | 0 | 0 |
| 0   | 69  | 140 | 0   | 0 | 0 | 0 | 0 |
| 0   | 67  | 175 | 0   | 0 | 0 | 0 | 0 |
| 0   | 0   | 107 | 0   | 0 | 0 | 0 | 0 |
| 0   | 0   | 166 | 0   | 0 | 0 | 0 | 0 |
| 0   | 2   | 41  | 0   | 0 | 0 | 0 | 0 |
| 0   | 33  | 79  | 0   | 0 | 0 | 0 | 0 |
| 0   | 42  | 286 | 0   | 0 | 0 | 0 | 0 |
| 0   | 0   | 17  | 0   | 0 | 0 | 0 | 0 |
| 0   | 10  | 4   | 0   | 0 | 0 | 0 | 0 |
| 0   | 0   | 58  | 0   | 0 | 0 | 0 | 0 |
| 0   | 13  | 4   | 0   | 0 | 0 | 0 | 0 |
| 98  | 37  | 0   | 0   | 0 | 0 | 0 | 0 |
| 5   | 40  | 2   | 0   | 0 | 0 | 0 | 0 |
| 11  | 31  | 0   | 0   | 0 | 0 | 0 | 0 |
| 0   | 0   | 59  | 0   | 0 | 0 | 0 | 0 |
| 0   | 14  | 220 | 0   | 0 | 0 | 0 | 0 |
| 0   | 0   | 63  | 0   | 0 | 0 | 0 | 0 |
| 91  | 20  | 0   | 0   | 0 | 0 | 0 | 0 |
| 218 | 60  | 0   | 0   | 0 | 0 | 0 | 0 |
| 0   | 0   | 87  | 0   | 0 | 0 | 0 | 0 |
| 0   | 6   | 34  | 0   | 0 | 0 | 0 | 0 |
| 138 | 28  | 0   | 0   | 0 | 0 | 0 | 0 |
| 165 | 85  | 0   | 0   | 0 | 0 | 0 | 0 |
| 20  | 113 | 2   | 0   | 0 | 0 | 0 | 0 |
| 38  | 179 | 0   | 0   | 0 | 0 | 0 | 0 |
| 6   | 45  | 0   | 0   | 0 | 0 | 0 | 0 |

|     |     |     |   |   |   |   |
|-----|-----|-----|---|---|---|---|
| 138 | 497 | 12  | 0 | 0 | 0 | 0 |
| 449 | 233 | 5   | 0 | 0 | 0 | 0 |
| 40  | 77  | 2   | 0 | 0 | 0 | 0 |
| 11  | 3   | 0   | 0 | 0 | 0 | 0 |
| 0   | 0   | 34  | 0 | 0 | 0 | 0 |
| 88  | 610 | 3   | 0 | 7 | 0 | 0 |
| 0   | 36  | 0   | 0 | 0 | 0 | 0 |
| 0   | 0   | 96  | 0 | 0 | 0 | 0 |
| 0   | 19  | 58  | 0 | 0 | 0 | 0 |
| 10  | 58  | 59  | 0 | 0 | 0 | 0 |
| 26  | 86  | 0   | 0 | 0 | 0 | 0 |
| 8   | 39  | 0   | 0 | 0 | 0 | 0 |
| 27  | 77  | 3   | 0 | 0 | 0 | 0 |
| 0   | 184 | 224 | 0 | 0 | 0 | 0 |
| 48  | 57  | 21  | 0 | 4 | 0 | 0 |
| 0   | 0   | 7   | 0 | 0 | 1 | 0 |
| 33  | 358 | 11  | 0 | 0 | 0 | 0 |
| 0   | 0   | 34  | 0 | 0 | 0 | 0 |
| 0   | 3   | 0   | 0 | 0 | 0 | 0 |
| 0   | 0   | 151 | 0 | 0 | 0 | 0 |
| 94  | 160 | 1   | 0 | 0 | 0 | 0 |
| 0   | 0   | 70  | 0 | 0 | 0 | 0 |
| 29  | 183 | 2   | 0 | 0 | 0 | 2 |
| 0   | 0   | 47  | 0 | 0 | 0 | 0 |
| 320 | 739 | 26  | 0 | 0 | 0 | 0 |
| 0   | 2   | 1   | 3 | 0 | 0 | 0 |
| 273 | 100 | 51  | 0 | 0 | 0 | 0 |
| 57  | 25  | 0   | 0 | 0 | 0 | 0 |
| 0   | 209 | 0   | 0 | 0 | 0 | 0 |
| 11  | 101 | 3   | 1 | 0 | 0 | 0 |
| 0   | 0   | 139 | 0 | 0 | 0 | 0 |
| 0   | 5   | 42  | 0 | 0 | 0 | 0 |
| 10  | 169 | 0   | 0 | 0 | 0 | 0 |
| 10  | 15  | 32  | 9 | 3 | 0 | 0 |
| 0   | 0   | 125 | 0 | 0 | 0 | 0 |
| 17  | 128 | 0   | 0 | 0 | 0 | 0 |
| 23  | 446 | 30  | 0 | 0 | 0 | 0 |
| 17  | 0   | 0   | 0 | 0 | 0 | 0 |
| 0   | 2   | 0   | 0 | 1 | 0 | 0 |
| 22  | 5   | 0   | 0 | 0 | 0 | 0 |
| 92  | 210 | 0   | 0 | 0 | 0 | 0 |
| 8   | 25  | 1   | 1 | 0 | 0 | 0 |
| 23  | 224 | 4   | 0 | 2 | 0 | 0 |

|     |      |     |   |   |   |   |
|-----|------|-----|---|---|---|---|
| 12  | 10   | 0   | 0 | 0 | 0 | 0 |
| 2   | 102  | 49  | 0 | 0 | 0 | 0 |
| 0   | 0    | 147 | 0 | 0 | 0 | 0 |
| 158 | 90   | 7   | 0 | 0 | 0 | 0 |
| 140 | 42   | 0   | 0 | 0 | 0 | 0 |
| 35  | 62   | 0   | 0 | 0 | 0 | 0 |
| 190 | 1096 | 15  | 0 | 0 | 0 | 0 |
| 141 | 77   | 0   | 0 | 0 | 0 | 0 |
| 40  | 135  | 0   | 0 | 0 | 0 | 0 |
| 13  | 125  | 4   | 0 | 0 | 0 | 0 |
| 55  | 29   | 0   | 0 | 0 | 0 | 0 |
| 134 | 50   | 15  | 0 | 0 | 0 | 0 |
| 14  | 3    | 0   | 0 | 0 | 0 | 0 |
| 69  | 10   | 0   | 0 | 5 | 0 | 0 |
| 5   | 0    | 0   | 0 | 0 | 0 | 0 |
| 57  | 30   | 3   | 0 | 0 | 0 | 0 |
| 28  | 21   | 50  | 0 | 0 | 0 | 0 |
| 28  | 8    | 0   | 0 | 0 | 0 | 0 |
| 54  | 0    | 0   | 0 | 0 | 0 | 0 |
| 22  | 50   | 28  | 0 | 0 | 0 | 0 |
| 4   | 6    | 509 | 1 | 0 | 0 | 0 |
| 9   | 4    | 3   | 1 | 0 | 0 | 0 |
| 179 | 1046 | 2   | 0 | 0 | 0 | 0 |
| 3   | 2    | 14  | 0 | 0 | 0 | 0 |
| 0   | 0    | 89  | 0 | 0 | 0 | 0 |
| 0   | 0    | 17  | 0 | 0 | 0 | 0 |
| 7   | 0    | 91  | 0 | 0 | 0 | 0 |
| 72  | 438  | 0   | 0 | 0 | 0 | 0 |
| 2   | 0    | 46  | 0 | 0 | 0 | 0 |
| 123 | 72   | 1   | 1 | 0 | 0 | 0 |
| 335 | 62   | 1   | 0 | 0 | 0 | 0 |
| 0   | 0    | 19  | 0 | 0 | 0 | 0 |
| 5   | 6    | 0   | 0 | 0 | 0 | 0 |
| 0   | 0    | 41  | 0 | 2 | 0 | 0 |
| 0   | 0    | 42  | 0 | 2 | 0 | 0 |
| 0   | 0    | 54  | 0 | 0 | 0 | 0 |
| 0   | 0    | 100 | 0 | 0 | 0 | 0 |
| 0   | 111  | 0   | 0 | 0 | 0 | 0 |
| 25  | 194  | 1   | 0 | 0 | 0 | 0 |
| 0   | 0    | 23  | 0 | 0 | 0 | 0 |
| 0   | 14   | 121 | 0 | 0 | 0 | 0 |
| 0   | 0    | 13  | 0 | 0 | 0 | 0 |
| 4   | 48   | 0   | 0 | 0 | 0 | 0 |

|     |      |     |    |    |   |   |
|-----|------|-----|----|----|---|---|
| 0   | 50   | 570 | 0  | 0  | 0 | 0 |
| 42  | 19   | 0   | 0  | 0  | 0 | 0 |
| 0   | 0    | 70  | 0  | 0  | 0 | 0 |
| 58  | 16   | 24  | 10 | 58 | 0 | 0 |
| 14  | 21   | 7   | 1  | 0  | 0 | 0 |
| 0   | 0    | 128 | 0  | 0  | 0 | 0 |
| 0   | 0    | 208 | 0  | 0  | 0 | 0 |
| 4   | 11   | 0   | 0  | 0  | 0 | 0 |
| 0   | 2    | 130 | 2  | 0  | 0 | 0 |
| 0   | 24   | 19  | 0  | 0  | 0 | 0 |
| 0   | 0    | 148 | 0  | 0  | 0 | 0 |
| 0   | 0    | 84  | 0  | 0  | 0 | 0 |
| 11  | 0    | 0   | 0  | 0  | 0 | 0 |
| 0   | 0    | 125 | 0  | 0  | 0 | 0 |
| 1   | 4    | 50  | 0  | 0  | 0 | 0 |
| 0   | 0    | 93  | 0  | 0  | 1 | 0 |
| 0   | 0    | 47  | 0  | 0  | 0 | 0 |
| 0   | 0    | 26  | 0  | 0  | 0 | 0 |
| 1   | 1    | 0   | 0  | 0  | 0 | 0 |
| 34  | 12   | 0   | 0  | 0  | 0 | 0 |
| 11  | 78   | 0   | 0  | 0  | 0 | 0 |
| 3   | 5    | 40  | 0  | 0  | 0 | 0 |
| 12  | 55   | 61  | 0  | 0  | 0 | 0 |
| 360 | 112  | 0   | 0  | 0  | 0 | 0 |
| 34  | 60   | 0   | 0  | 0  | 0 | 0 |
| 6   | 16   | 0   | 0  | 0  | 0 | 0 |
| 166 | 135  | 22  | 0  | 0  | 0 | 0 |
| 9   | 75   | 0   | 0  | 0  | 1 | 1 |
| 58  | 330  | 5   | 0  | 0  | 0 | 0 |
| 0   | 0    | 78  | 0  | 0  | 0 | 0 |
| 0   | 0    | 86  | 0  | 0  | 0 | 0 |
| 21  | 203  | 0   | 0  | 0  | 0 | 0 |
| 0   | 0    | 57  | 0  | 0  | 0 | 0 |
| 9   | 9    | 3   | 0  | 0  | 0 | 0 |
| 0   | 0    | 22  | 0  | 0  | 0 | 0 |
| 48  | 359  | 0   | 0  | 0  | 0 | 0 |
| 581 | 1181 | 15  | 2  | 2  | 0 | 0 |
| 33  | 333  | 0   | 0  | 0  | 0 | 0 |
| 828 | 336  | 1   | 0  | 0  | 0 | 0 |
| 30  | 7    | 0   | 0  | 0  | 0 | 0 |
| 0   | 7    | 0   | 0  | 0  | 0 | 0 |
| 4   | 8    | 0   | 0  | 0  | 0 | 0 |
| 196 | 282  | 2   | 3  | 0  | 0 | 0 |

|       |       |      |    |     |    |   |
|-------|-------|------|----|-----|----|---|
| 5     | 58    | 0    | 0  | 0   | 0  | 0 |
| 35    | 6     | 0    | 0  | 0   | 0  | 0 |
| 24    | 45    | 0    | 0  | 0   | 0  | 0 |
| 12    | 130   | 0    | 0  | 0   | 0  | 0 |
| 51    | 22    | 0    | 0  | 0   | 0  | 0 |
| 3384  | 3430  | 0    | 0  | 0   | 0  | 0 |
| 190   | 30    | 0    | 0  | 0   | 0  | 0 |
| 137   | 182   | 0    | 0  | 0   | 0  | 0 |
| 82    | 190   | 8    | 0  | 0   | 0  | 0 |
| 85    | 27    | 0    | 0  | 0   | 0  | 0 |
| 20    | 113   | 2    | 0  | 0   | 0  | 0 |
| 45    | 15    | 0    | 0  | 0   | 0  | 0 |
| 0     | 0     | 100  | 0  | 0   | 0  | 0 |
| 92    | 155   | 0    | 0  | 0   | 0  | 0 |
| 0     | 178   | 0    | 0  | 0   | 0  | 0 |
| 0     | 18    | 76   | 0  | 0   | 0  | 0 |
| 8     | 1     | 0    | 0  | 0   | 0  | 0 |
| 11    | 2     | 1    | 0  | 0   | 0  | 0 |
| 61    | 62    | 31   | 2  | 25  | 9  | 0 |
| 767   | 2059  | 46   | 0  | 0   | 0  | 0 |
| 48    | 69    | 1    | 0  | 0   | 0  | 0 |
| 219   | 48    | 0    | 0  | 0   | 0  | 0 |
| 0     | 11    | 0    | 0  | 0   | 0  | 0 |
| 0     | 10    | 0    | 0  | 0   | 0  | 0 |
| 429   | 559   | 204  | 0  | 0   | 0  | 0 |
| 449   | 575   | 47   | 0  | 0   | 0  | 0 |
| 25    | 207   | 0    | 0  | 0   | 0  | 0 |
| 0     | 20    | 0    | 0  | 0   | 0  | 0 |
| 848   | 276   | 0    | 0  | 0   | 0  | 0 |
| 9     | 15    | 33   | 0  | 0   | 0  | 0 |
| 169   | 526   | 0    | 0  | 0   | 0  | 0 |
| 36    | 130   | 0    | 0  | 0   | 0  | 0 |
| 112   | 111   | 0    | 0  | 0   | 0  | 0 |
| 64    | 1     | 2    | 0  | 0   | 0  | 0 |
| 0     | 0     | 134  | 0  | 0   | 0  | 0 |
| 54    | 83    | 39   | 2  | 4   | 0  | 0 |
| 14902 | 23116 | 7726 | 39 | 115 | 12 | 3 |



[illegible]

[illegible]

|   |   |    |    |     |    |   |
|---|---|----|----|-----|----|---|
| 0 | 0 | 0  | 0  | 0   | 0  | 0 |
| 0 | 0 | 0  | 0  | 0   | 0  | 0 |
| 0 | 0 | 0  | 0  | 0   | 0  | 0 |
| 0 | 0 | 0  | 0  | 0   | 0  | 0 |
| 0 | 0 | 0  | 0  | 0   | 0  | 0 |
| 0 | 0 | 0  | 0  | 0   | 0  | 0 |
| 0 | 0 | 0  | 0  | 0   | 0  | 0 |
| 0 | 0 | 0  | 0  | 0   | 0  | 0 |
| 0 | 0 | 5  | 0  | 0   | 0  | 0 |
| 0 | 0 | 0  | 0  | 0   | 0  | 0 |
| 0 | 0 | 41 | 0  | 0   | 0  | 0 |
| 0 | 0 | 0  | 0  | 0   | 0  | 0 |
| 0 | 0 | 0  | 0  | 0   | 0  | 0 |
| 0 | 0 | 0  | 0  | 0   | 0  | 0 |
| 0 | 0 | 0  | 0  | 0   | 0  | 0 |
| 0 | 0 | 0  | 0  | 0   | 0  | 0 |
| 0 | 0 | 0  | 0  | 0   | 0  | 0 |
| 0 | 0 | 0  | 11 | 0   | 12 | 0 |
| 0 | 0 | 0  | 0  | 0   | 0  | 0 |
| 0 | 0 | 0  | 0  | 0   | 0  | 0 |
| 0 | 0 | 0  | 0  | 0   | 0  | 0 |
| 0 | 2 | 0  | 7  | 124 | 14 | 1 |
| 0 | 0 | 3  | 0  | 1   | 2  | 0 |
| 0 | 0 | 0  | 0  | 0   | 0  | 0 |
| 0 | 0 | 0  | 0  | 0   | 0  | 0 |
| 0 | 0 | 0  | 0  | 0   | 0  | 0 |
| 0 | 0 | 0  | 0  | 0   | 0  | 0 |
| 0 | 0 | 0  | 0  | 0   | 0  | 0 |
| 0 | 0 | 0  | 0  | 0   | 27 | 0 |
| 0 | 0 | 0  | 0  | 0   | 0  | 0 |
| 0 | 0 | 0  | 0  | 0   | 0  | 0 |
| 0 | 0 | 0  | 0  | 0   | 0  | 0 |
| 0 | 0 | 0  | 0  | 0   | 0  | 0 |
| 0 | 0 | 0  | 0  | 0   | 0  | 0 |
| 0 | 0 | 0  | 0  | 0   | 0  | 0 |
| 0 | 0 | 0  | 0  | 0   | 0  | 0 |
| 0 | 0 | 0  | 0  | 0   | 0  | 0 |
| 0 | 0 | 0  | 0  | 0   | 0  | 0 |
| 0 | 0 | 0  | 0  | 0   | 0  | 0 |
| 0 | 0 | 2  | 16 | 3   | 1  | 0 |
| 0 | 0 | 0  | 0  | 0   | 0  | 0 |
| 0 | 0 | 2  | 1  | 0   | 0  | 0 |
| 0 | 0 | 0  | 2  | 0   | 0  | 0 |
| 0 | 0 | 0  | 0  | 2   | 0  | 0 |
| 0 | 0 | 0  | 0  | 0   | 0  | 0 |
| 0 | 0 | 1  | 0  | 0   | 0  | 0 |

|   |   |    |    |    |   |   |
|---|---|----|----|----|---|---|
| 7 | 0 | 0  | 0  | 0  | 0 | 0 |
| 0 | 0 | 0  | 0  | 0  | 0 | 0 |
| 0 | 0 | 0  | 0  | 0  | 0 | 0 |
| 0 | 0 | 0  | 0  | 0  | 0 | 0 |
| 0 | 0 | 0  | 0  | 0  | 0 | 0 |
| 0 | 0 | 0  | 0  | 26 | 0 | 0 |
| 0 | 0 | 0  | 0  | 27 | 0 | 0 |
| 0 | 0 | 0  | 0  | 0  | 0 | 0 |
| 0 | 0 | 0  | 1  | 3  | 0 | 0 |
| 0 | 0 | 0  | 0  | 0  | 0 | 0 |
| 0 | 0 | 0  | 0  | 0  | 0 | 0 |
| 0 | 0 | 0  | 0  | 3  | 0 | 0 |
| 0 | 0 | 0  | 0  | 0  | 0 | 0 |
| 0 | 0 | 0  | 0  | 0  | 0 | 0 |
| 0 | 0 | 0  | 0  | 0  | 0 | 0 |
| 0 | 0 | 0  | 0  | 0  | 0 | 0 |
| 0 | 0 | 0  | 0  | 0  | 0 | 0 |
| 0 | 0 | 0  | 0  | 0  | 0 | 0 |
| 0 | 0 | 0  | 0  | 0  | 0 | 0 |
| 0 | 0 | 0  | 0  | 0  | 0 | 0 |
| 0 | 0 | 0  | 0  | 0  | 0 | 0 |
| 0 | 0 | 0  | 0  | 0  | 0 | 0 |
| 0 | 0 | 11 | 0  | 0  | 0 | 0 |
| 0 | 0 | 0  | 0  | 0  | 0 | 0 |
| 0 | 0 | 4  | 0  | 0  | 0 | 0 |
| 0 | 0 | 0  | 0  | 0  | 0 | 0 |
| 0 | 0 | 0  | 0  | 0  | 0 | 0 |
| 0 | 0 | 2  | 0  | 0  | 0 | 0 |
| 0 | 0 | 0  | 0  | 0  | 0 | 0 |
| 0 | 0 | 44 | 36 | 0  | 0 | 0 |
| 0 | 0 | 0  | 0  | 0  | 0 | 0 |
| 0 | 0 | 0  | 0  | 0  | 0 | 0 |
| 0 | 0 | 0  | 0  | 0  | 0 | 0 |
| 0 | 0 | 0  | 0  | 0  | 0 | 0 |
| 0 | 0 | 0  | 0  | 0  | 0 | 0 |
| 0 | 0 | 0  | 0  | 0  | 0 | 0 |
| 0 | 0 | 0  | 0  | 0  | 0 | 0 |
| 0 | 0 | 0  | 0  | 0  | 0 | 0 |
| 0 | 0 | 4  | 0  | 0  | 0 | 0 |
| 0 | 0 | 0  | 0  | 0  | 0 | 0 |
| 0 | 0 | 34 | 0  | 0  | 0 | 0 |
| 0 | 0 | 18 | 0  | 0  | 5 | 0 |
| 0 | 0 | 1  | 0  | 0  | 0 | 0 |
| 0 | 0 | 0  | 0  | 0  | 0 | 0 |
| 0 | 0 | 0  | 0  | 0  | 0 | 0 |
| 0 | 0 | 0  | 0  | 0  | 0 | 0 |

|    |   |     |     |     |     |   |
|----|---|-----|-----|-----|-----|---|
| 0  | 0 | 0   | 0   | 0   | 0   | 0 |
| 0  | 0 | 0   | 0   | 0   | 0   | 0 |
| 2  | 0 | 0   | 0   | 0   | 0   | 0 |
| 0  | 0 | 0   | 0   | 0   | 0   | 0 |
| 0  | 0 | 0   | 0   | 0   | 0   | 0 |
| 0  | 0 | 0   | 0   | 0   | 0   | 0 |
| 0  | 0 | 0   | 0   | 0   | 0   | 0 |
| 0  | 0 | 0   | 0   | 0   | 0   | 0 |
| 0  | 0 | 0   | 0   | 0   | 0   | 0 |
| 0  | 0 | 0   | 0   | 0   | 0   | 0 |
| 0  | 0 | 0   | 0   | 0   | 0   | 0 |
| 0  | 0 | 1   | 0   | 0   | 0   | 0 |
| 0  | 0 | 0   | 0   | 0   | 0   | 0 |
| 0  | 0 | 0   | 0   | 0   | 0   | 0 |
| 0  | 0 | 0   | 0   | 0   | 0   | 0 |
| 0  | 0 | 0   | 0   | 0   | 0   | 0 |
| 0  | 0 | 0   | 0   | 0   | 0   | 0 |
| 0  | 0 | 0   | 0   | 0   | 0   | 0 |
| 0  | 0 | 0   | 0   | 0   | 0   | 0 |
| 0  | 0 | 0   | 0   | 0   | 0   | 0 |
| 0  | 0 | 0   | 0   | 0   | 0   | 0 |
| 0  | 0 | 0   | 0   | 0   | 0   | 0 |
| 0  | 0 | 0   | 0   | 0   | 0   | 0 |
| 0  | 0 | 2   | 0   | 0   | 0   | 0 |
| 0  | 0 | 2   | 0   | 0   | 0   | 0 |
| 0  | 0 | 0   | 0   | 0   | 0   | 0 |
| 0  | 0 | 0   | 259 | 0   | 0   | 0 |
| 0  | 0 | 0   | 29  | 0   | 0   | 0 |
| 0  | 0 | 0   | 0   | 0   | 0   | 0 |
| 0  | 0 | 0   | 0   | 0   | 0   | 0 |
| 0  | 0 | 0   | 0   | 0   | 0   | 0 |
| 0  | 0 | 0   | 0   | 0   | 0   | 0 |
| 0  | 0 | 0   | 0   | 0   | 0   | 0 |
| 0  | 0 | 0   | 0   | 0   | 0   | 0 |
| 0  | 0 | 0   | 0   | 0   | 0   | 0 |
| 0  | 0 | 0   | 0   | 0   | 0   | 0 |
| 0  | 0 | 0   | 0   | 0   | 0   | 0 |
| 0  | 0 | 2   | 0   | 0   | 0   | 0 |
| 0  | 0 | 0   | 0   | 0   | 0   | 0 |
| 0  | 0 | 9   | 0   | 16  | 0   | 0 |
| 33 | 5 | 394 | 454 | 232 | 105 | 1 |

[illegible]

[illegible]

[illegible]



[illegible]

[illegible]

[illegible]

[illegible]

|   |   |   |      |   |   |   |
|---|---|---|------|---|---|---|
| 0 | 0 | 0 | 0    | 0 | 0 | 0 |
| 0 | 0 | 0 | 0    | 0 | 0 | 0 |
| 0 | 0 | 0 | 0    | 0 | 0 | 0 |
| 0 | 0 | 0 | 0    | 0 | 0 | 0 |
| 0 | 0 | 0 | 0    | 0 | 0 | 0 |
| 0 | 0 | 0 | 96   | 0 | 0 | 0 |
| 0 | 0 | 0 | 1290 | 0 | 0 | 0 |
| 0 | 0 | 0 | 0    | 0 | 0 | 0 |
| 0 | 0 | 0 | 0    | 0 | 0 | 0 |
| 0 | 0 | 0 | 0    | 0 | 0 | 0 |
| 0 | 0 | 0 | 0    | 0 | 0 | 0 |
| 0 | 0 | 0 | 0    | 0 | 0 | 0 |
| 0 | 0 | 0 | 0    | 0 | 0 | 0 |
| 0 | 0 | 0 | 0    | 0 | 0 | 0 |
| 0 | 0 | 0 | 0    | 0 | 0 | 0 |
| 0 | 0 | 0 | 0    | 0 | 0 | 0 |
| 0 | 0 | 0 | 0    | 0 | 0 | 0 |
| 0 | 0 | 0 | 0    | 0 | 0 | 0 |
| 0 | 5 | 0 | 0    | 0 | 0 | 0 |
| 0 | 0 | 0 | 0    | 0 | 0 | 0 |
| 0 | 0 | 0 | 0    | 0 | 0 | 0 |
| 0 | 0 | 0 | 0    | 0 | 0 | 0 |
| 0 | 0 | 0 | 0    | 0 | 0 | 0 |
| 2 | 0 | 0 | 0    | 0 | 0 | 0 |
| 0 | 0 | 0 | 0    | 0 | 0 | 0 |
| 0 | 0 | 0 | 0    | 0 | 0 | 0 |
| 0 | 0 | 0 | 0    | 0 | 0 | 0 |
| 0 | 0 | 0 | 0    | 0 | 0 | 0 |
| 0 | 0 | 0 | 0    | 0 | 0 | 0 |
| 0 | 0 | 0 | 0    | 0 | 0 | 0 |
| 0 | 0 | 0 | 0    | 0 | 0 | 0 |
| 0 | 0 | 0 | 470  | 0 | 0 | 0 |
| 0 | 0 | 0 | 0    | 0 | 0 | 0 |
| 0 | 0 | 0 | 0    | 0 | 0 | 0 |
| 0 | 0 | 0 | 0    | 0 | 0 | 0 |
| 0 | 0 | 0 | 0    | 0 | 0 | 0 |
| 0 | 0 | 0 | 0    | 0 | 0 | 0 |
| 0 | 0 | 0 | 0    | 0 | 0 | 0 |
| 0 | 0 | 0 | 0    | 0 | 0 | 0 |
| 0 | 0 | 0 | 0    | 0 | 0 | 0 |
| 0 | 0 | 0 | 0    | 0 | 0 | 0 |
| 0 | 0 | 0 | 54   | 0 | 0 | 0 |
| 0 | 7 | 2 | 0    | 0 | 0 | 0 |
| 0 | 0 | 0 | 0    | 0 | 0 | 0 |
| 0 | 0 | 0 | 219  | 0 | 0 | 0 |
| 0 | 0 | 0 | 0    | 0 | 0 | 0 |
| 0 | 0 | 0 | 0    | 0 | 0 | 0 |
| 0 | 0 | 0 | 0    | 0 | 0 | 0 |
| 0 | 0 | 0 | 0    | 0 | 0 | 0 |

|   |   |   |     |   |   |    |
|---|---|---|-----|---|---|----|
| 0 | 0 | 0 | 0   | 0 | 0 | 0  |
| 0 | 0 | 0 | 0   | 0 | 0 | 0  |
| 0 | 0 | 0 | 0   | 0 | 0 | 0  |
| 0 | 0 | 0 | 0   | 0 | 0 | 0  |
| 0 | 0 | 0 | 0   | 0 | 0 | 0  |
| 0 | 0 | 0 | 0   | 0 | 0 | 0  |
| 0 | 0 | 0 | 0   | 0 | 0 | 0  |
| 0 | 0 | 0 | 0   | 0 | 0 | 0  |
| 0 | 0 | 0 | 0   | 0 | 0 | 0  |
| 0 | 0 | 0 | 0   | 0 | 0 | 0  |
| 0 | 0 | 0 | 45  | 9 | 0 | 0  |
| 0 | 0 | 0 | 0   | 0 | 0 | 0  |
| 0 | 0 | 0 | 0   | 0 | 0 | 0  |
| 0 | 0 | 0 | 0   | 0 | 0 | 0  |
| 0 | 0 | 0 | 0   | 0 | 0 | 0  |
| 0 | 0 | 0 | 0   | 0 | 0 | 0  |
| 0 | 0 | 0 | 0   | 0 | 0 | 0  |
| 0 | 0 | 0 | 93  | 0 | 0 | 0  |
| 0 | 0 | 0 | 0   | 0 | 0 | 0  |
| 0 | 0 | 0 | 26  | 0 | 0 | 0  |
| 0 | 0 | 0 | 0   | 0 | 0 | 0  |
| 0 | 0 | 0 | 37  | 0 | 0 | 26 |
| 0 | 0 | 0 | 0   | 0 | 0 | 0  |
| 0 | 0 | 0 | 0   | 0 | 0 | 0  |
| 0 | 0 | 0 | 0   | 0 | 0 | 0  |
| 0 | 0 | 0 | 0   | 0 | 0 | 0  |
| 0 | 0 | 0 | 0   | 0 | 0 | 0  |
| 0 | 0 | 0 | 0   | 0 | 0 | 0  |
| 0 | 0 | 0 | 0   | 0 | 0 | 0  |
| 0 | 0 | 0 | 0   | 0 | 0 | 0  |
| 0 | 0 | 0 | 0   | 0 | 0 | 0  |
| 0 | 0 | 0 | 323 | 0 | 0 | 0  |
| 0 | 0 | 0 | 0   | 0 | 0 | 0  |
| 0 | 0 | 0 | 0   | 0 | 0 | 0  |
| 0 | 0 | 0 | 78  | 0 | 0 | 0  |
| 0 | 0 | 0 | 86  | 0 | 0 | 0  |
| 0 | 0 | 0 | 0   | 0 | 0 | 0  |
| 0 | 0 | 0 | 0   | 0 | 0 | 0  |
| 0 | 0 | 0 | 0   | 0 | 0 | 0  |
| 0 | 0 | 0 | 0   | 0 | 0 | 0  |
| 0 | 0 | 0 | 0   | 0 | 0 | 0  |
| 0 | 0 | 0 | 0   | 0 | 0 | 0  |
| 0 | 0 | 0 | 0   | 0 | 0 | 0  |
| 0 | 0 | 0 | 0   | 0 | 0 | 0  |
| 0 | 0 | 0 | 0   | 0 | 0 | 0  |
| 0 | 0 | 0 | 0   | 0 | 0 | 0  |
| 0 | 0 | 0 | 12  | 0 | 0 | 0  |
| 0 | 0 | 0 | 0   | 0 | 0 | 0  |

|   |    |   |      |    |    |    |
|---|----|---|------|----|----|----|
| 0 | 0  | 0 | 0    | 0  | 0  | 0  |
| 0 | 0  | 0 | 0    | 0  | 0  | 0  |
| 0 | 0  | 0 | 45   | 0  | 0  | 0  |
| 0 | 0  | 0 | 0    | 0  | 0  | 0  |
| 0 | 0  | 0 | 0    | 0  | 0  | 0  |
| 0 | 0  | 0 | 0    | 0  | 0  | 0  |
| 0 | 0  | 0 | 0    | 0  | 0  | 0  |
| 0 | 0  | 0 | 0    | 0  | 0  | 0  |
| 0 | 0  | 0 | 0    | 0  | 0  | 0  |
| 0 | 0  | 0 | 0    | 0  | 0  | 0  |
| 0 | 0  | 0 | 112  | 0  | 0  | 0  |
| 0 | 0  | 0 | 0    | 0  | 0  | 0  |
| 0 | 0  | 0 | 0    | 0  | 0  | 0  |
| 0 | 0  | 0 | 0    | 0  | 0  | 0  |
| 0 | 0  | 0 | 247  | 0  | 0  | 0  |
| 0 | 0  | 0 | 0    | 0  | 0  | 0  |
| 0 | 0  | 0 | 0    | 0  | 0  | 0  |
| 0 | 0  | 0 | 0    | 0  | 0  | 0  |
| 0 | 0  | 0 | 0    | 0  | 0  | 0  |
| 0 | 0  | 0 | 0    | 0  | 0  | 0  |
| 0 | 0  | 0 | 2202 | 0  | 0  | 2  |
| 0 | 0  | 0 | 0    | 0  | 0  | 0  |
| 0 | 0  | 0 | 0    | 0  | 0  | 0  |
| 0 | 0  | 0 | 0    | 0  | 0  | 0  |
| 0 | 0  | 0 | 0    | 0  | 0  | 0  |
| 0 | 0  | 0 | 0    | 0  | 0  | 0  |
| 0 | 0  | 0 | 0    | 0  | 0  | 0  |
| 0 | 0  | 0 | 0    | 0  | 0  | 0  |
| 0 | 0  | 0 | 0    | 0  | 0  | 0  |
| 0 | 0  | 0 | 0    | 0  | 0  | 0  |
| 0 | 0  | 0 | 0    | 0  | 0  | 0  |
| 0 | 0  | 0 | 0    | 0  | 0  | 0  |
| 0 | 0  | 0 | 0    | 0  | 0  | 0  |
| 0 | 0  | 0 | 0    | 0  | 0  | 0  |
| 0 | 0  | 0 | 0    | 0  | 0  | 0  |
| 0 | 0  | 0 | 0    | 0  | 0  | 0  |
| 0 | 0  | 0 | 0    | 0  | 0  | 0  |
| 0 | 0  | 0 | 0    | 0  | 0  | 0  |
| 2 | 0  | 0 | 0    | 0  | 0  | 0  |
| 4 | 12 | 2 | 7245 | 16 | 30 | 37 |

[illegible]



[illegible]

|     |   |   |   |   |   |     |
|-----|---|---|---|---|---|-----|
| 0   | 0 | 0 | 0 | 0 | 0 | 0   |
| 0   | 0 | 0 | 0 | 0 | 0 | 0   |
| 0   | 0 | 0 | 0 | 0 | 0 | 0   |
| 0   | 0 | 0 | 0 | 0 | 0 | 0   |
| 0   | 0 | 0 | 0 | 0 | 0 | 0   |
| 35  | 0 | 0 | 0 | 0 | 0 | 4   |
| 182 | 0 | 0 | 0 | 0 | 0 | 0   |
| 0   | 0 | 0 | 0 | 0 | 0 | 0   |
| 0   | 0 | 0 | 0 | 0 | 0 | 0   |
| 0   | 0 | 0 | 0 | 0 | 0 | 0   |
| 0   | 0 | 0 | 0 | 0 | 0 | 0   |
| 0   | 0 | 0 | 0 | 0 | 0 | 0   |
| 0   | 0 | 0 | 0 | 0 | 0 | 0   |
| 0   | 0 | 0 | 0 | 0 | 0 | 0   |
| 0   | 0 | 0 | 0 | 0 | 0 | 0   |
| 0   | 0 | 0 | 0 | 0 | 0 | 0   |
| 0   | 0 | 0 | 0 | 0 | 0 | 0   |
| 0   | 0 | 0 | 0 | 0 | 0 | 0   |
| 0   | 0 | 0 | 0 | 0 | 0 | 0   |
| 0   | 0 | 0 | 0 | 0 | 0 | 0   |
| 0   | 0 | 0 | 0 | 0 | 0 | 0   |
| 0   | 0 | 0 | 0 | 0 | 0 | 0   |
| 0   | 0 | 0 | 0 | 0 | 0 | 0   |
| 0   | 0 | 0 | 0 | 0 | 0 | 0   |
| 0   | 0 | 0 | 0 | 0 | 0 | 0   |
| 0   | 0 | 0 | 0 | 0 | 0 | 0   |
| 63  | 0 | 0 | 0 | 0 | 0 | 0   |
| 0   | 0 | 0 | 0 | 0 | 0 | 0   |
| 0   | 0 | 0 | 0 | 0 | 0 | 0   |
| 0   | 0 | 0 | 0 | 0 | 0 | 0   |
| 0   | 0 | 0 | 0 | 0 | 0 | 0   |
| 0   | 0 | 0 | 0 | 0 | 0 | 0   |
| 0   | 0 | 0 | 0 | 0 | 0 | 0   |
| 0   | 0 | 0 | 0 | 0 | 0 | 0   |
| 0   | 0 | 0 | 0 | 0 | 0 | 0   |
| 0   | 0 | 0 | 0 | 0 | 0 | 0   |
| 0   | 0 | 0 | 0 | 0 | 0 | 0   |
| 0   | 0 | 0 | 0 | 0 | 0 | 0   |
| 0   | 0 | 0 | 0 | 0 | 0 | 0   |
| 0   | 0 | 0 | 0 | 0 | 0 | 0   |
| 8   | 9 | 8 | 0 | 0 | 0 | 192 |
| 0   | 0 | 0 | 0 | 0 | 0 | 0   |
| 0   | 0 | 0 | 0 | 0 | 0 | 0   |
| 0   | 0 | 0 | 0 | 0 | 0 | 0   |
| 0   | 0 | 0 | 0 | 0 | 0 | 0   |

[illegible]

|      |     |     |    |    |    |      |
|------|-----|-----|----|----|----|------|
| 0    | 0   | 0   | 0  | 0  | 0  | 0    |
| 0    | 35  | 0   | 0  | 0  | 0  | 6    |
| 0    | 0   | 0   | 0  | 0  | 0  | 10   |
| 0    | 0   | 0   | 0  | 0  | 0  | 0    |
| 0    | 0   | 0   | 0  | 0  | 0  | 0    |
| 0    | 0   | 0   | 0  | 0  | 0  | 0    |
| 0    | 0   | 0   | 0  | 0  | 0  | 0    |
| 0    | 0   | 0   | 0  | 0  | 0  | 0    |
| 0    | 0   | 0   | 0  | 0  | 0  | 0    |
| 85   | 0   | 0   | 0  | 0  | 0  | 0    |
| 0    | 0   | 0   | 0  | 0  | 0  | 0    |
| 0    | 0   | 0   | 0  | 0  | 0  | 0    |
| 0    | 0   | 0   | 0  | 0  | 0  | 0    |
| 92   | 0   | 0   | 0  | 0  | 0  | 30   |
| 0    | 0   | 0   | 0  | 0  | 0  | 0    |
| 0    | 0   | 0   | 0  | 0  | 0  | 0    |
| 0    | 0   | 0   | 0  | 0  | 0  | 0    |
| 0    | 0   | 0   | 0  | 0  | 0  | 0    |
| 0    | 0   | 0   | 0  | 0  | 0  | 0    |
| 601  | 6   | 2   | 0  | 0  | 0  | 236  |
| 0    | 0   | 0   | 0  | 0  | 0  | 0    |
| 0    | 0   | 0   | 0  | 0  | 0  | 0    |
| 0    | 0   | 0   | 0  | 0  | 0  | 0    |
| 0    | 0   | 0   | 0  | 0  | 0  | 0    |
| 0    | 0   | 0   | 0  | 0  | 0  | 0    |
| 0    | 0   | 0   | 0  | 0  | 0  | 0    |
| 0    | 0   | 0   | 0  | 0  | 0  | 0    |
| 0    | 0   | 0   | 0  | 0  | 0  | 0    |
| 0    | 0   | 0   | 0  | 0  | 0  | 0    |
| 0    | 0   | 0   | 0  | 0  | 0  | 0    |
| 0    | 0   | 0   | 0  | 0  | 0  | 0    |
| 0    | 0   | 0   | 0  | 0  | 0  | 0    |
| 0    | 0   | 0   | 0  | 0  | 0  | 0    |
| 0    | 0   | 0   | 0  | 0  | 0  | 0    |
| 0    | 0   | 0   | 0  | 0  | 0  | 0    |
| 0    | 0   | 0   | 0  | 0  | 0  | 0    |
| 0    | 0   | 0   | 0  | 0  | 0  | 0    |
| 0    | 0   | 0   | 0  | 0  | 0  | 0    |
| 0    | 0   | 0   | 0  | 0  | 0  | 0    |
| 1411 | 166 | 123 | 95 | 10 | 22 | 1026 |

[illegible]

[illegible]

[illegible]

[illegible]



|      |    |    |    |   |   |    |
|------|----|----|----|---|---|----|
| 0    | 0  | 0  | 0  | 0 | 0 | 0  |
| 0    | 0  | 0  | 0  | 0 | 0 | 0  |
| 28   | 0  | 0  | 3  | 0 | 4 | 0  |
| 0    | 0  | 0  | 0  | 0 | 0 | 0  |
| 0    | 0  | 0  | 0  | 0 | 0 | 0  |
| 0    | 0  | 0  | 0  | 0 | 0 | 0  |
| 0    | 0  | 0  | 0  | 0 | 0 | 0  |
| 0    | 0  | 0  | 0  | 0 | 0 | 0  |
| 0    | 0  | 0  | 0  | 0 | 0 | 0  |
| 0    | 0  | 0  | 0  | 0 | 0 | 0  |
| 27   | 0  | 0  | 0  | 0 | 0 | 0  |
| 0    | 0  | 0  | 0  | 0 | 0 | 0  |
| 0    | 0  | 0  | 0  | 0 | 0 | 0  |
| 0    | 0  | 0  | 0  | 0 | 0 | 0  |
| 125  | 0  | 0  | 0  | 0 | 0 | 0  |
| 0    | 0  | 0  | 0  | 0 | 0 | 0  |
| 0    | 0  | 0  | 0  | 0 | 0 | 0  |
| 0    | 0  | 0  | 0  | 0 | 0 | 0  |
| 0    | 0  | 0  | 0  | 0 | 0 | 0  |
| 0    | 0  | 0  | 0  | 0 | 0 | 0  |
| 1277 | 4  | 2  | 15 | 0 | 0 | 0  |
| 0    | 0  | 0  | 0  | 0 | 0 | 0  |
| 0    | 0  | 0  | 0  | 0 | 0 | 0  |
| 0    | 0  | 0  | 0  | 0 | 0 | 0  |
| 0    | 0  | 0  | 0  | 0 | 0 | 0  |
| 0    | 0  | 0  | 0  | 0 | 0 | 0  |
| 0    | 0  | 0  | 0  | 0 | 0 | 0  |
| 0    | 0  | 0  | 0  | 0 | 0 | 0  |
| 0    | 0  | 0  | 0  | 0 | 0 | 0  |
| 0    | 0  | 0  | 0  | 0 | 0 | 0  |
| 0    | 0  | 0  | 0  | 0 | 0 | 0  |
| 0    | 0  | 0  | 0  | 0 | 0 | 0  |
| 0    | 0  | 0  | 0  | 0 | 0 | 0  |
| 0    | 0  | 0  | 0  | 0 | 0 | 0  |
| 0    | 0  | 0  | 0  | 0 | 0 | 0  |
| 0    | 0  | 0  | 0  | 0 | 0 | 0  |
| 0    | 0  | 0  | 0  | 0 | 0 | 0  |
| 0    | 0  | 0  | 0  | 0 | 0 | 0  |
| 0    | 0  | 0  | 0  | 0 | 0 | 0  |
| 3747 | 14 | 11 | 59 | 2 | 4 | 24 |

[illegible]

[illegible]

[illegible]

[illegible]

[illegible]

D5

D6

D/Ddel

[illegible]

[illegible]



[illegible]

[illegible]

[illegible]

## PUBMED

(tajikistan[Title/Abstract]) OR (uzbekistan[Title/Abstract]) OR (kazakhstan[Title/Abstract]) OR (turkmenistan[Title/Abstract]) OR (kyrgyzstan[Title/Abstract]) OR (georgia[Title/Abstract]) OR (armenia[Title/Abstract]) OR (azerbaijan[Title/Abstract]) OR (turkey[Title/Abstract]) OR (cyprus[Title/Abstract]) OR (syria[Title/Abstract]) OR (lebanon[Title/Abstract]) OR (israel[Title/Abstract]) OR (jordan[Title/Abstract]) OR (iraq[Title/Abstract]) OR (oman[Title/Abstract]) OR (yemen[Title/Abstract]) OR (kuwait[Title/Abstract]) OR (bahrain[Title/Abstract]) OR (qatar[Title/Abstract]) OR (brunei[Title/Abstract]) OR (cambodia[Title/Abstract]) OR (indonesia[Title/Abstract]) OR (laos[Title/Abstract]) OR (malaysia[Title/Abstract]) OR (myanmar[Title/Abstract]) OR (philippine[Title/Abstract]) OR (singapore[Title/Abstract]) OR (sri lanka[Title/Abstract]) OR (thailand[Title/Abstract]) OR (timor-leste[Title/Abstract]) OR (vietnam[Title/Abstract]) OR (bangladesh[Title/Abstract]) OR (india[Title/Abstract]) OR (afghanistan[Title/Abstract]) OR (pakistan[Title/Abstract]) OR (bhutan[Title/Abstract]) OR (nepal[Title/Abstract]) OR (maldives[Title/Abstract]) OR (iran[Title/Abstract]) OR (china[Title/Abstract]) OR (mongolia[Title/Abstract]) OR (north korea[Title/Abstract]) OR (south korea[Title/Abstract]) OR (japan[Title/Abstract]) OR (hong kong[Title/Abstract]) OR (taiwan[Title/Abstract]) OR (macau[Title/Abstract]) ) ) OR (timor[Title/Abstract]) AND ("genot\*" [Title/Abstract]) AND ((HBV[Title/Abstract]) OR ("Hepatitis B"[Title/Abstract]))

## SCOPUS

### Scopus

1. (genotype OR genotypes) (HBV OR "Hepatitis B")(tajikistan OR uzbekistan OR kazakhstan OR turkmenistan)
2. (genotype OR genotypes) (HBV OR "Hepatitis B") (kyrgyzstan OR georgia OR armenia OR azerbaijan)
3. (genotype OR genotypes) (HBV OR "Hepatitis B") (turkey OR cyprus OR syria OR lebanon)
4. (genotype OR genotypes)(HBV OR "Hepatitis B") (israel OR jordan OR iraq OR oman)
5. (genotype OR genotypes) (HBV OR "Hepatitis B") (yemen OR kuwait OR bahrain OR qatar)
6. (genotype OR genotypes) (HBV OR "Hepatitis B") (brunei OR cambodia OR indonesia OR laos)
7. (genotype OR genotypes) (HBV OR "Hepatitis B") (malaysia OR myanmar OR philippine OR singapore)
8. (genotype OR genotypes) (HBV OR "Hepatitis B") (sri lanka OR thailand OR timor-leste OR vietnam)
9. (genotype OR genotypes) (HBV OR "Hepatitis B") (bangladesh OR india OR afghanistan OR pakistan)
10. (genotype OR genotypes) (HBV OR "Hepatitis B") (bhutan OR nepal OR maldives OR iran)
11. (genotype OR genotypes) (HBV OR "Hepatitis B") (china OR mongolia OR “north korea” OR “south korea”)
12. (genotype OR genotypes) (HBV OR "Hepatitis B") (japan OR “hong kong” OR taiwan OR macau)
13. (genotype OR genotypes) (HBV OR "Hepatitis B") (timor)

## ScienceDirect

1. (genotype OR genotypes) (HBV OR "Hepatitis B")(tajikistan OR uzbekistan OR kazakhstan OR turkmenistan)
2. (genotype OR genotypes) (HBV OR "Hepatitis B") (kyrgyzstan OR georgia OR armenia OR azerbaijan)-1
3. (genotype OR genotypes) (HBV OR "Hepatitis B") (turkey OR cyprus OR syria OR lebanon)-24
4. (genotype OR genotypes)(HBV OR "Hepatitis B") (israel OR jordan OR iraq OR oman)-6
5. (genotype OR genotypes) (HBV OR "Hepatitis B") (yemen OR kuwait OR bahrain OR qatar)-1
6. (genotype OR genotypes) (HBV OR "Hepatitis B") (brunei OR cambodia OR indonesia OR laos)-10
7. (genotype OR genotypes) (HBV OR "Hepatitis B") (malaysia OR myanmar OR philippine OR singapore) - 3
8. (genotype OR genotypes) (HBV OR "Hepatitis B") (sri lanka OR thailand OR timor-leste OR vietnam)-13
9. (genotype OR genotypes) (HBV OR "Hepatitis B") (bangladesh OR india OR afghanistan OR pakistan)-49
10. (genotype OR genotypes) (HBV OR "Hepatitis B") (bhutan OR nepal OR maldives OR iran)-22
11. (genotype OR genotypes) (HBV OR "Hepatitis B") (china OR mongolia OR "north korea" OR "south korea")-144
12. (genotype OR genotypes) (HBV OR "Hepatitis B") (japan OR "hong kong" OR taiwan OR macau)-106
13. (genotype OR genotypes) (HBV OR "Hepatitis B") (timor)-237

## Google Scholar

### GROUP A

allintitle: hepatitis b genotype tajikistan OR uzbekistan OR kazakhstan OR turkmenistan OR kyrgyzstan OR georgia OR armenia OR azerbaijan OR turkey OR cyprus OR syria OR lebanon OR israel OR jordan OR iraq OR oman OR yemen OR kuwait OR bahrain OR Qatar

### GROUP B

allintitle: hepatitis b genotype myanmar OR Philippine OR singapore OR sri-lanka OR thailand OR timor-leste OR vietnam OR bangladesh OR india OR afghanistan OR pakistan OR bhutan OR nepal OR maldives OR iran "Hepatitis B" -"hepatitis c"

### GROUP C

allintitle: hepatitis B genotype china OR mongolia OR "north korea" OR "south korea" OR japan OR "hong kong" OR taiwan OR macau OR timor OR brunei OR cambodia OR indonesia OR laos OR Malaysia "hepatitis b"



## QUALITY OF INCLUDED STUDIES BY JBI CRITICAL APPRAISAL CHECKLIST FOR STUDIES REPORTING PREVALENCE DATA

| S/N | Name of authors and year of publication |      | JBI checklist* |     |     |     |     |     |     |     |     | Total |
|-----|-----------------------------------------|------|----------------|-----|-----|-----|-----|-----|-----|-----|-----|-------|
| 1   | Abbas et al                             | 2009 | 1              | 2   | 3   | 4   | 5   | 6   | 7   | 8   | 9   |       |
| 2   | Abbasian et al                          | 2021 | Yes            | No  | Yes | 16    |
| 3   | Abdulkadirova et al                     | 2020 | Yes            | No  | Yes | 16    |
| 4   | Aftab et al                             | 2018 | Yes            | No  | Yes | 16    |
| 5   | Aghakhani et al                         | 2009 | Yes            | No  | Yes | 16    |
| 6   | Alam. et al                             | 2007 | Yes            | No  | Yes | 16    |
| 7   | Alam et al                              | 2007 | Yes            | No  | Yes | 16    |
| 8   | Alavian et al                           | 2006 | Yes            | No  | Yes | 16    |
| 9   | Anvari et al                            | 2016 | Yes            | No  | Yes | 16    |
| 10  | Andi. et al                             | 2009 | Yes            | No  | Yes | 16    |
| 11  | Andi et al                              | 2009 | Yes            | No  | Yes | 16    |
| 12  | Anis et al                              | 2008 | Yes            | No  | Yes | 16    |
| 13  | Anvari et al                            | 2013 | Yes            | No  | Yes | 16    |
| 14  | Aono et al                              | 2007 | Yes            | No  | Yes | 16    |
| 15  | Arabadadi et al                         | 2011 | Yes            | No  | Yes | 16    |
| 16  | Arifur et al                            | 2016 | Yes            | No  | Yes | 16    |
| 17  | Arup et al                              | 2006 | Yes            | No  | Yes | 16    |
| 18  | Ashrafali et al                         | 2014 | Yes            | No  | Yes | 16    |
| 19  | Atalay et al                            | 2011 | Yes            | No  | Yes | 16    |
| 20  | Attaran et al                           | 2017 | Yes            | No  | Yes | 16    |
| 21  | Avik. et al                             | 2013 | Yes            | No  | Yes | 16    |
| 22  | Avik et al                              | 2009 | Yes            | No  | Yes | 16    |
| 23  | Babana et al                            | 2017 | Yes            | No  | Yes | 16    |
| 24  | Bhagirathi et al                        | 2014 | Yes            | No  | Yes | 16    |
| 25  | Borkakoty et al                         | 2008 | Yes            | No  | Yes | 16    |
| 26  | Bozdayo et al                           | 2003 | Yes            | No  | Yes | 16    |
| 27  | Brij et al                              | 2018 | Yes            | Yes | Yes | Yes | Yes | Yes | Yes | Yes | Yes | 18    |
| 28  | Bui et al                               | 2017 | Yes            | Yes | Yes | Yes | Yes | Yes | Yes | Yes | Yes | 18    |
| 29  | Chamni et al                            | 2014 | Yes            | No  | Yes | 16    |
| 30  | Chan et al                              | 2002 | Yes            | No  | Yes | 16    |
| 31  | Chandana et al                          | 2011 | Yes            | No  | Yes | 16    |
| 32  | Choudhardy et al                        | 2008 | Yes            | No  | Yes | 16    |
| 33  | Ciftci et al                            | 2012 | Yes            | No  | Yes | 16    |
| 34  | Cuong et al                             | 2011 | Yes            | No  | Yes | 16    |
| 35  | D-D Li et al                            | 2010 | Yes            | No  | Yes | 16    |
| 36  | Davod et al                             | 2019 | Yes            | No  | Yes | 16    |
| 37  | Debraj et al                            | 2014 | Yes            | Yes | Yes | Yes | Yes | Yes | Yes | Yes | Yes | 18    |
| 38  | Ding. et al                             | 2004 | Yes            | No  | Yes | 16    |
| 39  | Ding.. et al                            | 2013 | Yes            | Yes | Yes | Yes | Yes | Yes | Yes | Yes | Yes | 18    |
| 40  | Ding et al.                             | 2002 | Yes            | No  | Yes | 16    |
| 41  | Ding et al                              | 2001 | Yes            | Yes | Yes | Yes | Yes | Yes | Yes | Yes | Yes | 18    |
| 42  | Dong. et al                             | 2009 | Yes            | No  | Yes | 16    |
| 43  | Dong.. et al                            | 2021 | Yes            | No  | Yes | 16    |
| 44  | Dong et al                              | 2009 | Yes            | No  | Yes | 16    |
| 45  | Du et al                                | 2006 | Yes            | Yes | Yes | Yes | Yes | Yes | Yes | Yes | Yes | 18    |
| 46  | Edward et al                            | 2005 | Yes            | No  | Yes | 16    |
| 47  | Emekdas et al                           | 2012 | Yes            | Yes | Yes | Yes | Yes | Yes | Yes | Yes | Yes | 18    |
| 48  | Etsuro et al                            | 2001 | Yes            | No  | Yes | 16    |
| 49  | Fang et al                              | 2004 | Yes            | Yes | Yes | Yes | Yes | Yes | Yes | Yes | Yes | 18    |
| 50  | Farah et al                             | 2014 | Yes            | No  | Yes | 16    |
| 51  | Farooq et al                            | 2021 | Yes            | No  | Yes | 16    |
| 52  | Fei et al                               | 2009 | Yes            | No  | Yes | 16    |
| 53  | Fujie et al                             | 2001 | Yes            | No  | Yes | 16    |
| 54  | Fujiko et al                            | 2015 | Yes            | Yes | Yes | Yes | Yes | Yes | Yes | Yes | Yes | 18    |
| 55  | Fuminaka et al                          | 2002 | Yes            | Yes | Yes | Yes | Yes | Yes | Yes | Yes | Yes | 18    |
| 56  | Furusyo et al                           | 2004 | Yes            | No  | Yes | 16    |
| 57  | Ghani et al                             | 2011 | Yes            | No  | Yes | 16    |
| 58  | Gollapudi et al                         | 2008 | Yes            | No  | Yes | 16    |
| 59  | Gu et al                                | 2004 | Yes            | No  | Yes | 16    |
| 60  | Haimanti et al                          | 2014 | Yes            | No  | Yes | 16    |
| 61  | Haixia et al                            | 2013 | Yes            | No  | Yes | 16    |

|     |                     |      |     |     |     |     |     |     |     |     |     |    |
|-----|---------------------|------|-----|-----|-----|-----|-----|-----|-----|-----|-----|----|
| 62  | Hakim et al         | 2016 | Yes | No  | Yes | 16 |
| 63  | Han et al           | 2009 | Yes | No  | Yes | 16 |
| 64  | Hani et al          | 2008 | Yes | No  | Yes | 16 |
| 65  | Hayashi et al       | 2007 | Yes | No  | Yes | 16 |
| 66  | Hideaki et al       | 2002 | Yes | No  | Yes | 16 |
| 67  | Hong mei et al      | 2015 | Yes | No  | Yes | 16 |
| 68  | Hooi et al          | 2005 | Yes | No  | Yes | 16 |
| 69  | Hu et al            | 2004 | Yes | No  | Yes | 16 |
| 70  | Hudu et al          | 2018 | Yes | No  | Yes | 16 |
| 71  | Hyun-Ju et al       | 2007 | Yes | No  | Yes | 16 |
| 72  | Inui et al          | 2007 | Yes | No  | Yes | 16 |
| 73  | Ivana et al         | 2013 | Yes | No  | Yes | 16 |
| 74  | Jagdish et al       | 2020 | Yes | No  | Yes | 16 |
| 75  | Jin et al           | 2010 | Yes | No  | Yes | 16 |
| 76  | Kailash et al       | 2011 | Yes | No  | Yes | 16 |
| 77  | Kaklikkaya et al    | 2012 | Yes | No  | Yes | 16 |
| 78  | Kamol et al         | 2007 | Yes | No  | Yes | 16 |
| 79  | Kana et al          | 2007 | Yes | No  | Yes | 16 |
| 80  | Karimi et al        | 2014 | Yes | No  | Yes | 16 |
| 81  | Kaya et al          | 2007 | Yes | No  | Yes | 16 |
| 82  | Kazuhiko et al      | 2009 | Yes | No  | Yes | 16 |
| 83  | kikuchi et al       | 2000 | Yes | No  | Yes | 16 |
| 84  | Kobayashi et al     | 2002 | Yes | No  | Yes | 16 |
| 85  | Komatsu et al       | 2015 | Yes | No  | Yes | 16 |
| 86  | Kwon et al          | 2018 | Yes | No  | Yes | 16 |
| 87  | Kyaw et al          | 2020 | Yes | No  | Yes | 16 |
| 88  | Leblebicioglu et al | 2004 | Yes | No  | Yes | 16 |
| 89  | Lee et al           | 2003 | Yes | No  | Yes | 16 |
| 90  | Lei et al           | 2005 | Yes | No  | Yes | 16 |
| 91  | Li et al            | 2010 | Yes | No  | Yes | 16 |
| 92  | Li. et al           | 2011 | Yes | No  | Yes | 16 |
| 93  | Li ..et al          | 2011 | Yes | No  | Yes | 16 |
| 94  | Li et al.           | 2007 | Yes | No  | Yes | 16 |
| 95  | Li et al..          | 2006 | Yes | No  | Yes | 16 |
| 96  | Lin et al           | 2007 | Yes | No  | Yes | 16 |
| 97  | Liu. et al          | 2012 | Yes | No  | Yes | 16 |
| 98  | Liu.. et al         | 2004 | Yes | No  | Yes | 16 |
| 99  | Liu et al.          | 2002 | Yes | No  | Yes | 16 |
| 100 | Liu et al           | 2010 | Yes | No  | Yes | 16 |
| 101 | Lu. et al           | 2007 | Yes | No  | Yes | 16 |
| 102 | Lu.. et al          | 2007 | Yes | No  | Yes | 16 |
| 103 | Lu et al            | 2011 | Yes | No  | Yes | 16 |
| 104 | Lusida et al        | 2003 | Yes | No  | Yes | 16 |
| 105 | Ma. et al           | 2011 | Yes | No  | Yes | 16 |
| 106 | Mahmood et al       | 2016 | Yes | No  | Yes | 16 |
| 107 | Manamperi et al     | 2011 | Yes | No  | Yes | 16 |
| 108 | Matsuura et al      | 2009 | Yes | No  | Yes | 16 |
| 109 | Modhusudon et al    | 2016 | Yes | No  | Yes | 16 |
| 110 | Mojiri et al        | 2008 | Yes | No  | Yes | 16 |
| 111 | Mousavi. et al      | 2014 | Yes | No  | Yes | 16 |
| 112 | Mousavi et al       | 2014 | Yes | No  | Yes | 16 |
| 113 | Nei et al           | 2012 | Yes | No  | Yes | 16 |
| 114 | Neisi et al         | 2011 | Yes | No  | Yes | 16 |
| 115 | Nguyen et al        | 2008 | Yes | No  | Yes | 16 |
| 116 | Ni et al            | 2004 | Yes | No  | Yes | 16 |
| 117 | Norouzi et al       | 2012 | Yes | No  | Yes | 16 |
| 118 | Ogawa et al         | 2002 | Yes | 18 |
| 119 | Oguzoglu et al      | 2001 | Yes | No  | Yes | 16 |
| 120 | Onganar et          | 2006 | Yes | No  | Yes | 16 |
| 121 | Ozdemir et al       | 2005 | Yes | No  | Yes | 16 |
| 122 | Panicker et al      | 2021 | Yes | 18 |
| 123 | Parichat et al      | 2015 | Yes | No  | Yes | 16 |
| 124 | Pattaratida et al   | 2010 | Yes | No  | Yes | 16 |
| 125 | Paudel et al        | 2015 | Yes | 18 |
| 126 | Perumal et al       | 2004 | Yes | No  | Yes | 16 |
| 127 | Pinarbasi et al     | 2008 | Yes | No  | Yes | 16 |



|     |                          |      |     |     |     |     |     |     |     |     |     |    |
|-----|--------------------------|------|-----|-----|-----|-----|-----|-----|-----|-----|-----|----|
| 128 | Prapan et al             | 2008 | Yes | 18 |
| 129 | Premashis et al          | 2021 | Yes | 18 |
| 130 | Priyo et al              | 2016 | Yes | 18 |
| 131 | Rafatpanah et al         | 2008 | Yes | No  | Yes | 16 |
| 132 | Rana et al               | 2019 | Yes | No  | Yes | 16 |
| 133 | Retno et al              | 1991 | Yes | No  | Yes | 16 |
| 134 | Saeeda. et al            | 2008 | Yes | No  | Yes | 16 |
| 135 | Saeeda et al             | 2007 | Yes | No  | Yes | 16 |
| 136 | Sahapat et al            | 2012 | Yes | No  | Yes | 16 |
| 137 | Said et al               | 2014 | Yes | No  | Yes | 16 |
| 138 | Saif et al               | 2017 | Yes | No  | Yes | 16 |
| 139 | Saket. et al             | 2006 | Yes | No  | Yes | 16 |
| 140 | Saket et al              | 2006 | Yes | No  | Yes | 16 |
| 141 | Salman et al             | 2019 | Yes | 18 |
| 142 | Samad et al              | 2009 | Yes | No  | Yes | 16 |
| 143 | Santosh et al            | 2006 | Yes | No  | Yes | 16 |
| 144 | Sayan & Dogan            | 2012 | Yes | No  | Yes | 16 |
| 145 | Serin et al              | 2005 | Yes | No  | Yes | 16 |
| 146 | Shahnaz et al            | 2018 | Yes | No  | Yes | 16 |
| 147 | Shamima et al            | 2017 | Yes | No  | Yes | 16 |
| 148 | Shen et al               | 2015 | Yes | No  | Yes | 16 |
| 149 | Shi et al                | 2012 | Yes | No  | Yes | 16 |
| 150 | Smita et al              | 2020 | Yes | No  | Yes | 16 |
| 151 | Sobia et al              | 2011 | Yes | No  | Yes | 16 |
| 152 | Song. et al              | 2005 | Yes | No  | Yes | 16 |
| 153 | Song et al               | 2006 | Yes | No  | Yes | 16 |
| 154 | Srey et al               | 2006 | Yes | No  | Yes | 16 |
| 155 | Su et al                 | 2020 | Yes | No  | Yes | 16 |
| 156 | Suda et al               | 2012 | Yes | No  | Yes | 16 |
| 157 | Sugauchi et al           | 2006 | Yes | No  | Yes | 16 |
| 158 | Sunbul and Leblebicioglu | 2005 | Yes | No  | Yes | 16 |
| 159 | Sunbul et al             | 2003 | Yes | No  | Yes | 16 |
| 160 | Suzuki et al             | 2003 | Yes | 18 |
| 161 | Swati et al              | 2003 | Yes | No  | Yes | 16 |
| 162 | Takako et al             | 2009 | Yes | No  | Yes | 16 |
| 163 | Talal et al              | 2004 | Yes | No  | Yes | 16 |
| 164 | Tamada et al             | 2011 | Yes | 18 |
| 165 | Tanaka et al             | 2009 | Yes | No  | Yes | 16 |
| 166 | Tang et al               | 2007 | Yes | No  | Yes | 16 |
| 167 | Tao et al                | 2019 | Yes | No  | Yes | 16 |
| 168 | Thanh et al              | 2005 | Yes | No  | Yes | 16 |
| 169 | Torii et al              | 2013 | Yes | No  | Yes | 16 |
| 170 | Tran et al               | 2008 | Yes | No  | Yes | 16 |
| 171 | Usuda et al              | 1999 | Yes | No  | Yes | 16 |
| 172 | Wada et al               | 2014 | Yes | No  | Yes | 16 |
| 173 | Wahyuni et al            | 2019 | Yes | No  | Yes | 16 |
| 174 | Wang. et al              | 2014 | Yes | No  | Yes | 16 |
| 175 | Wang.. et al             | 2012 | Yes | No  | Yes | 16 |
| 176 | Wang et al               | 2018 | Yes | No  | Yes | 16 |
| 177 | Wei et al                | 2015 | Yes | No  | Yes | 16 |
| 178 | Wen and Tan              | 2004 | Yes | No  | Yes | 16 |
| 179 | Wu et al                 | 2012 | Yes | No  | Yes | 16 |
| 180 | Xia et al                | 2001 | Yes | No  | Yes | 16 |
| 181 | Xiang et al              | 2012 | Yes | No  | Yes | 16 |
| 182 | Xin et al                | 2002 | Yes | No  | Yes | 16 |
| 183 | Yan. et al               | 2010 | Yes | 18 |
| 184 | yahya et al              | 2010 | Yes | No  | Yes | 16 |
| 185 | Yan et al                | 2015 | Yes | No  | Yes | 16 |
| 186 | Yanag et al              | 2017 | Yes | No  | Yes | 16 |
| 187 | Yashwant et al           | 2017 | Yes | No  | Yes | 16 |
| 188 | Ye. et al                | 2017 | Yes | No  | Yes | 16 |
| 189 | Ye et al                 | 2021 | Yes | No  | Yes | 16 |
| 190 | Yeh et al                | 2004 | Yes | No  | Yes | 16 |
| 191 | Yin et al                | 2010 | Yes | No  | Yes | 16 |
| 192 | You et al                | 2008 | Yes | No  | Yes | 16 |
| 193 | youyun et al             | 2016 | Yes | No  | Yes | 16 |

|     |               |      |     |     |     |     |     |     |     |     |     |    |
|-----|---------------|------|-----|-----|-----|-----|-----|-----|-----|-----|-----|----|
| 194 | Zaatari et al | 2007 | Yes | No  | Yes | 16 |
| 195 | Zang. et al   | 2009 | Yes | No  | Yes | 16 |
| 196 | Zang et al    | 2015 | Yes | No  | Yes | 16 |
| 197 | Zeng et al    | 2005 | Yes | No  | Yes | 16 |
| 198 | Zhang et al   | 2018 | Yes | No  | Yes | 16 |
| 199 | Zhao et al    | 2001 | Yes | No  | Yes | 16 |
| 200 | Zhili et al   | 2014 | Yes | No  | Yes | 16 |
| 201 | Zhong et al   | 2005 | Yes | No  | Yes | 16 |
| 202 | Zhu et al     | 2008 | Yes | No  | Yes | 16 |
| 203 | Zhu. et al    | 2008 | Yes | No  | Yes | 16 |
| 204 | Zhu. et al    | 2015 | Yes | No  | Yes | 16 |
| 205 | Zhuang et al  | 2007 | Yes | No  | Yes | 16 |
| 206 | Zohreh        | 2013 | Yes | 18 |
| 207 | Zunaira et al | 2010 | Yes | No  | Yes | 16 |

**JBIChecklist\* 1.** Appropriate sampling frame to address target population, **2.** Appropriate sampling way of study participants, **3.** Adequate sample size, **4.** Detail description of study participants and settings, **5.** Data analysis with sufficient coverage of identified sample, **6.** Use of valid methods to identify the condition, **7.** Standard, reliable way of measurement of condition for all participants, **8.** Availability of appropriate statistical analysis, **9.** Adequate response rate and management of low response rate.

**Scores are coded as Yes=2 and No=0.**

Table S10. Subgroup analysis for comparison of prevalence of HBV genotypes in Asia across the methods of genotyping

| Method            | Number of studies | Prevalence (%) | 95% CI      | $I^2$ (%) | Q       | Heterogeneity test |        |
|-------------------|-------------------|----------------|-------------|-----------|---------|--------------------|--------|
|                   |                   |                |             |           |         | DF                 | P      |
| Genotype A        |                   |                |             |           |         |                    |        |
| Sequencing        | 132               | 2.9            | 2.2 – 3.8   | 91.43     | 1529.03 | 131                | <0.001 |
| Multiplex PCR     | 26                | 3.5            | 1.9 – 6.3   | 93.49     | 383.88  | 25                 | <0.001 |
| LIPA              | 13                | 2.2            | 1.0 – 4.7   | 81.83     | 66.03   | 12                 | <0.001 |
| RFLP              | 30                | 4.5            | 2.9 – 7.1   | 91.91     | 358.254 | 29                 | <0.001 |
| RDB hybridization | 6                 | 0.9            | 0.00 – 17.1 | 92.82     | 69.66   | 5                  | <0.001 |
| Overall           | 207               | 3.1            | 2.5 – 3.8   | 91.79     | 2507.63 | 206                | <0.001 |
| Genotype B        |                   |                |             |           |         |                    |        |
| Sequencing        | 132               | 16.7           | 14.2 – 19.6 | 96.53     | 3773.10 | 131                | <0.001 |
| Multiplex PCR     | 26                | 29.3           | 19.5 – 41.4 | 98.29     | 1464.16 | 25                 | <0.001 |
| LIPA              | 13                | 19.5           | 10.5 – 33.4 | 96.53     | 345.79  | 12                 | <0.001 |
| RFLP              | 30                | 8.9            | 5.1 – 15.1  | 97.34     | 1088.76 | 29                 | <0.001 |
| RDB hybridization | 6                 | 50.0           | 36.4 – 63.6 | 94.39     | 89.14   | 5                  | <0.001 |
| Overall           | 207               | 17.8           | 15.5 – 20.4 | 97.26     | 7524.23 | 206                | <0.001 |
| Genotype C        |                   |                |             |           |         |                    |        |
| Sequencing        | 132               | 35.1           | 31.0 – 39.4 | 97.03     | 4407.51 | 131                | <0.001 |
| Multiplex PCR     | 26                | 23.6           | 15.1 – 34.7 | 98.23     | 1411.05 | 25                 | <0.001 |
| LIPA              | 13                | 26.0           | 14.8 – 41.4 | 96.77     | 371.82  | 12                 | <0.001 |
| RFLP              | 30                | 20.6           | 12.5 – 31.9 | 98.1      | 1530.08 | 29                 | <0.001 |
| RDB hybridization | 6                 | 39.8           | 25.0 – 56.8 | 94.93     | 98.60   | 5                  | <0.001 |
| Overall           | 207               | 30.9           | 27.5 – 34.5 | 97.57     | 8476.52 | 206                | <0.001 |
| Genotype D        |                   |                |             |           |         |                    |        |
| Sequencing        | 132               | 17.3           | 12.4 – 23.7 | 97.54     | 5325.73 | 131                | <0.001 |
| Multiplex PCR     | 26                | 6.8            | 3.3 – 13.5  | 97.13     | 872.11  | 25                 | <0.001 |
| LIPA              | 13                | 7.7            | 1.5 – 31.6  | 95.82     | 286.75  | 12                 | <0.001 |
| RFLP              | 30                | 36.5           | 20.3 – 56.6 | 97.51     | 1165.14 | 29                 | <0.001 |
| RDB hybridization | 6                 | 0.6            | 0.2 – 1.7   | 35.46     | 7.75    | 5                  | 0.171  |
| Overall           | 207               | 15.4           | 11.8 – 19.8 | 97.37     | 7819.59 | 206                | <0.001 |
| Genotype E        |                   |                |             |           |         |                    |        |
| Sequencing        | 132               | 0.6            | 0.5 – 0.8   | 11.42     | 147.89  | 131                | 0.149  |
| Multiplex PCR     | 26                | 0.6            | 0.3 – 1.2   | 67.7      | 77.40   | 25                 | <0.001 |
| LIPA              | 13                | 0.5            | 0.3 – 1.0   | 0.00      | 4.08    | 12                 | 0.982  |
| RFLP              | 30                | 0.5            | 0.3 – 0.8   | 0.00      | 23.63   | 29                 | 0.747  |
| RDB hybridization | 6                 | 0.3            | 0.1 – 1.1   | 0.00      | 4.37    | 5                  | 0.497  |
| Overall           | 207               | 0.6            | 0.5 – 0.7   | 29.79     | 293.39  | 206                | <0.001 |
| Genotype F        |                   |                |             |           |         |                    |        |
| Sequencing        | 132               | 0.6            | 0.4 – 0.7   | 0.00      | 112.86  | 131                | 0.872  |
| Multiplex PCR     | 26                | 0.5            | 0.2 – 1.7   | 89.9      | 247.41  | 25                 | <0.001 |
| LIPA              | 13                | 0.5            | 0.3 – 1.0   | 0.00      | 3.66    | 12                 | 0.989  |
| RFLP              | 30                | 0.8            | 0.4 – 1.7   | 76.29     | 122.32  | 29                 | <0.001 |
| RDB hybridization | 6                 | 0.3            | 0.1 – 1.1   | 0.00      | 4.37    | 5                  | 0.497  |
| Overall           | 207               | 0.6            | 0.4 – 0.8   | 75.26     | 832.73  | 206                | <0.001 |
| Genotype G        |                   |                |             |           |         |                    |        |
| Sequencing        | 132               | 0.6            | 0.4 – 0.7   | 0.00      | 114.454 | 131                | 0.848  |
| Multiplex PCR     | 26                | 0.4            | 0.2 – 0.8   | 0.00      | 19.35   | 25                 | 0.780  |
| LIPA              | 13                | 0.4            | 0.2 – 0.8   | 0.00      | 2.93    | 12                 | 0.996  |
| RFLP              | 30                | 0.6            | 0.3 – 1.0   | 41.9      | 49.91   | 29                 | 0.009  |
| RDB hybridization | 6                 | 0.3            | 0.1 – 1.1   | 0.00      | 4.37    | 5                  | 0.497  |
| Overall           | 207               | 0.6            | 0.5 – 0.7   | 0.00      | 205.13  | 206                | 0.504  |
| Genotype H        |                   |                |             |           |         |                    |        |
| Sequencing        | 132               | 0.6            | 0.4 – 0.7   | 0.00      | 109.04  | 131                | 0.919  |
| Multiplex PCR     | 26                | 0.4            | 0.2 – 0.6   | 0.00      | 19.35   | 25                 | 0.780  |
| LIPA              | 13                | 0.4            | 0.2 – 0.8   | 0.00      | 2.93    | 12                 | 0.996  |
| RFLP              | 30                | 0.5            | 0.3 – 0.8   | 0.00      | 22.99   | 29                 | 0.777  |
| RDB hybridization | 6                 | 0.3            | 0.1 – 1.1   | 0.00      | 4.37    | 5                  | 0.497  |
| Overall           | 207               | 0.5            | 0.4 – 0.6   | 0.00      | 162.06  | 206                | 0.989  |
| Genotype I        |                   |                |             |           |         |                    |        |
| Sequencing        | 132               | 0.8            | 0.6 – 1.0   | 0.00      | 127.99  | 131                | 0.558  |
| Multiplex PCR     | 26                | 0.4            | 0.2 – 0.6   | 0.00      | 19.35   | 25                 | 0.780  |
| LIPA              | 13                | 0.4            | 0.2 – 0.8   | 0.00      | 2.93    | 12                 | 0.996  |
| RFLP              | 30                | 0.5            | 0.3 – 0.8   | 0.00      | 22.99   | 29                 | 0.777  |
| RDB hybridization | 6                 | 0.3            | 0.1 – 1.1   | 0.00      | 4.37    | 5                  | 0.497  |

|         |     |     |           |      |        |     |       |
|---------|-----|-----|-----------|------|--------|-----|-------|
| Overall | 207 | 0.6 | 0.5 – 0.8 | 0.00 | 190.91 | 206 | 0.767 |
|---------|-----|-----|-----------|------|--------|-----|-------|

LIPA: Line probe assay, RFLP: restriction fragment length polymorphism, RDB: reverse dot blot

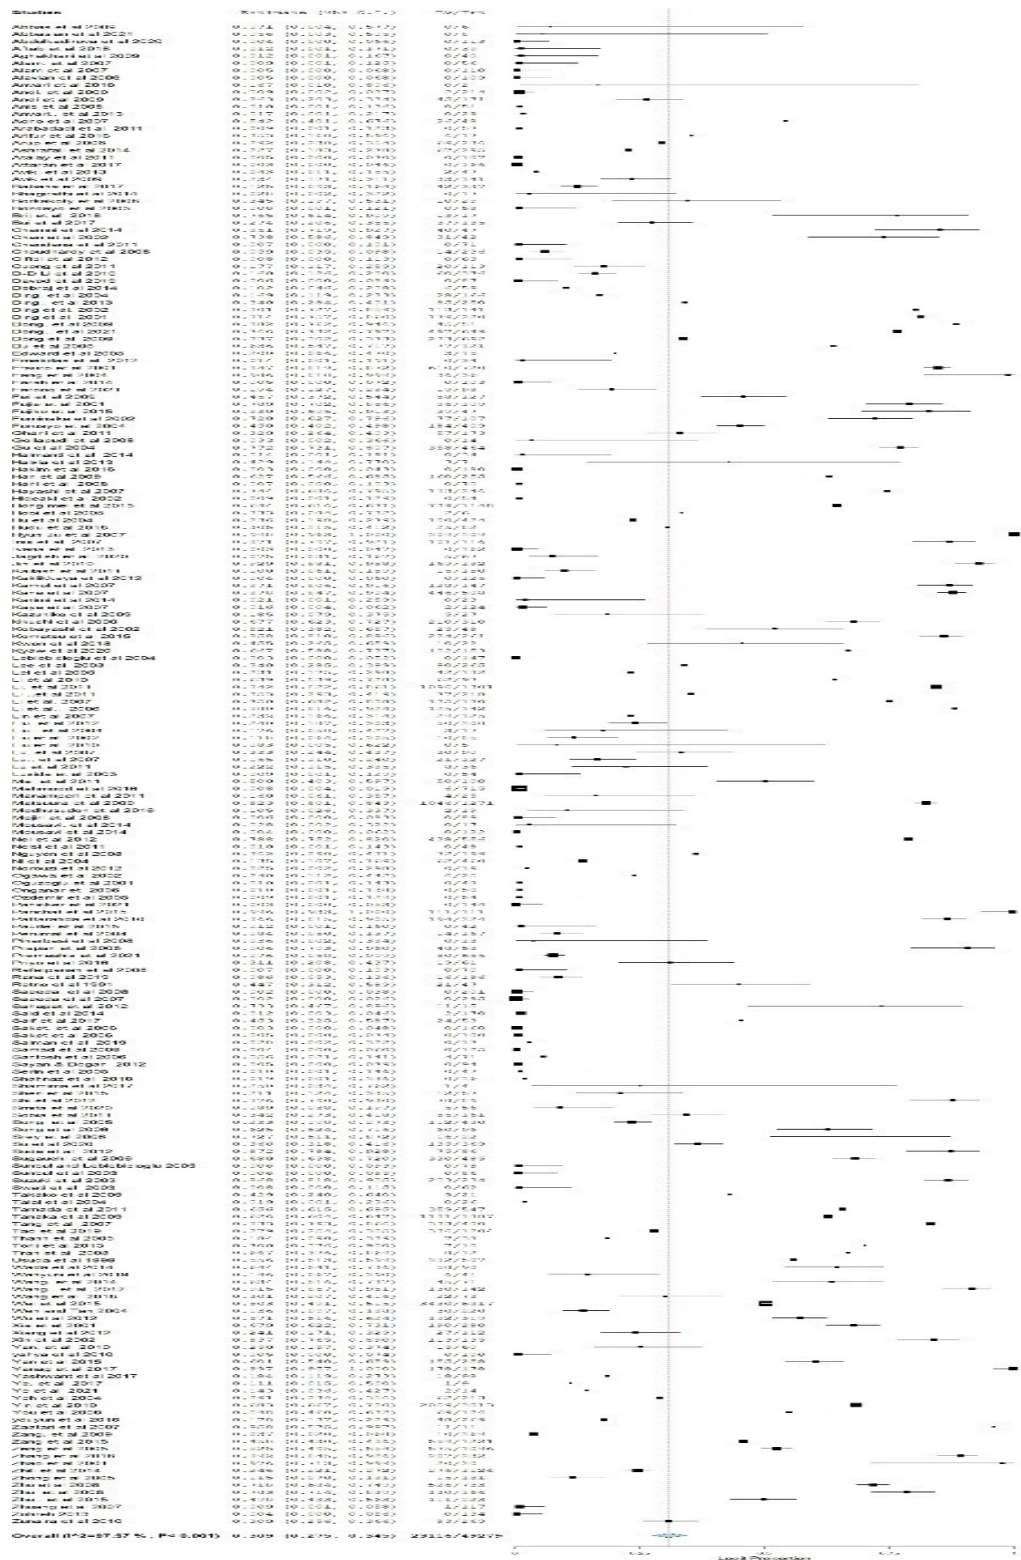

Figure 2. Forest plot showing the pooled prevalence of HBV genotype C in Asia.

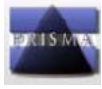

# PRISMA 2009 Checklist

| Section/topic                      | #  | Checklist item                                                                                                                                                                                                                                                                                              | Reported on page # |
|------------------------------------|----|-------------------------------------------------------------------------------------------------------------------------------------------------------------------------------------------------------------------------------------------------------------------------------------------------------------|--------------------|
| <b>TITLE</b>                       |    |                                                                                                                                                                                                                                                                                                             |                    |
| Title                              | 1  | Identify the report as a systematic review, meta-analysis, or both.                                                                                                                                                                                                                                         | 1                  |
| <b>ABSTRACT</b>                    |    |                                                                                                                                                                                                                                                                                                             |                    |
| Structured summary                 | 2  | Provide a structured summary including, as applicable: background; objectives; data sources; study eligibility criteria, participants, and interventions; study appraisal and synthesis methods; results; limitations; conclusions and implications of key findings; systematic review registration number. | 2                  |
| <b>INTRODUCTION</b>                |    |                                                                                                                                                                                                                                                                                                             |                    |
| Rationale                          | 3  | Describe the rationale for the review in the context of what is already known.                                                                                                                                                                                                                              | 3-4                |
| Objectives                         | 4  | Provide an explicit statement of questions being addressed with reference to participants, interventions, comparisons, outcomes, and study design (PICOS).                                                                                                                                                  | 3-4                |
| <b>METHODS</b>                     |    |                                                                                                                                                                                                                                                                                                             |                    |
| Protocol and registration          | 5  | Indicate if a review protocol exists, if and where it can be accessed (e.g., Web address), and, if available, provide registration information including registration number.                                                                                                                               | 6                  |
| Eligibility criteria               | 6  | Specify study characteristics (e.g., PICOS, length of follow-up) and report characteristics (e.g., years considered, language, publication status) used as criteria for eligibility, giving rationale.                                                                                                      | 5                  |
| Information sources                | 7  | Describe all information sources (e.g., databases with dates of coverage, contact with study authors to identify additional studies) in the search and date last searched.                                                                                                                                  | 5-6                |
| Search                             | 8  | Present full electronic search strategy for at least one database, including any limits used, such that it could be repeated.                                                                                                                                                                               | 5                  |
| Study selection                    | 9  | State the process for selecting studies (i.e., screening, eligibility, included in systematic review, and, if applicable, included in the meta-analysis).                                                                                                                                                   | 5-6                |
| Data collection process            | 10 | Describe method of data extraction from reports (e.g., piloted forms, independently, in duplicate) and any processes for obtaining and confirming data from investigators.                                                                                                                                  | 5-6                |
| Data items                         | 11 | List and define all variables for which data were sought (e.g., PICOS, funding sources) and any assumptions and simplifications made.                                                                                                                                                                       | 5-6                |
| Risk of bias in individual studies | 12 | Describe methods used for assessing risk of bias of individual studies (including specification of whether this was done at the study or outcome level), and how this information is to be used in any data synthesis.                                                                                      | 5-6                |
| Summary measures                   | 13 | State the principal summary measures (e.g., risk ratio, difference in means).                                                                                                                                                                                                                               | 6                  |
| Synthesis of results               | 14 | Describe the methods of handling data and combining results of studies, if done, including measures of consistency (e.g., $I^2$ ) for each meta-analysis.                                                                                                                                                   | 6                  |

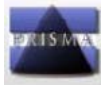

# PRISMA 2009 Checklist

| Section/topic                 | #  | Checklist item                                                                                                                                                                                           | Reported on page # |
|-------------------------------|----|----------------------------------------------------------------------------------------------------------------------------------------------------------------------------------------------------------|--------------------|
| Risk of bias across studies   | 15 | Specify any assessment of risk of bias that may affect the cumulative evidence (e.g., publication bias, selective reporting within studies).                                                             | 6                  |
| Additional analyses           | 16 | Describe methods of additional analyses (e.g., sensitivity or subgroup analyses, meta-regression), if done, indicating which were pre-specified.                                                         | 6                  |
| <b>RESULTS</b>                |    |                                                                                                                                                                                                          |                    |
| Study selection               | 17 | Give numbers of studies screened, assessed for eligibility, and included in the review, with reasons for exclusions at each stage, ideally with a flow diagram.                                          | 7                  |
| Study characteristics         | 18 | For each study, present characteristics for which data were extracted (e.g., study size, PICOS, follow-up period) and provide the citations.                                                             | 7-11               |
| Risk of bias within studies   | 19 | Present data on risk of bias of each study and, if available, any outcome level assessment (see item 12).                                                                                                | 12                 |
| Results of individual studies | 20 | For all outcomes considered (benefits or harms), present, for each study: (a) simple summary data for each intervention group (b) effect estimates and confidence intervals, ideally with a forest plot. | 12                 |
| Synthesis of results          | 21 | Present results of each meta-analysis done, including confidence intervals and measures of consistency.                                                                                                  | 12                 |
| Risk of bias across studies   | 22 | Present results of any assessment of risk of bias across studies (see Item 15).                                                                                                                          | 12                 |
| Additional analysis           | 23 | Give results of additional analyses, if done (e.g., sensitivity or subgroup analyses, meta-regression [see Item 16]).                                                                                    | 12-16              |
| <b>DISCUSSION</b>             |    |                                                                                                                                                                                                          |                    |
| Summary of evidence           | 24 | Summarize the main findings including the strength of evidence for each main outcome; consider their relevance to key groups (e.g., healthcare providers, users, and policy makers).                     | 19-21              |
| Limitations                   | 25 | Discuss limitations at study and outcome level (e.g., risk of bias), and at review-level (e.g., incomplete retrieval of identified research, reporting bias).                                            | 20-21              |
| Conclusions                   | 26 | Provide a general interpretation of the results in the context of other evidence, and implications for future research.                                                                                  | 19-21              |
| <b>FUNDING</b>                |    |                                                                                                                                                                                                          |                    |
| Funding                       | 27 | Describe sources of funding for the systematic review and other support (e.g., supply of data); role of funders for the systematic review.                                                               | 21                 |

GENOTPE A

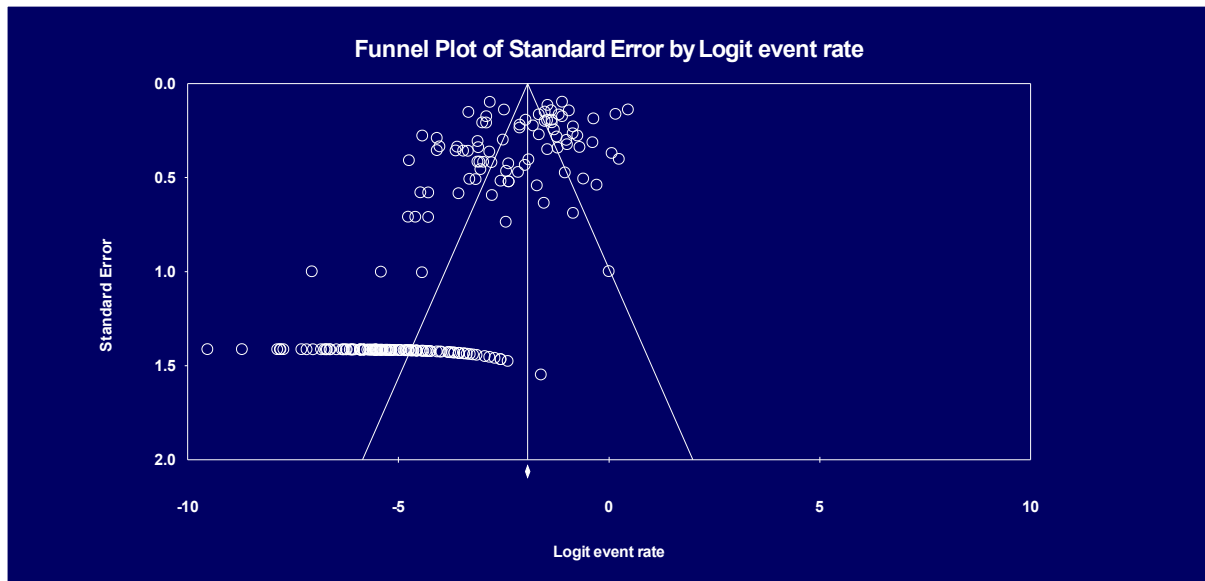

Egger p = 0.00000

GENPTYPE B

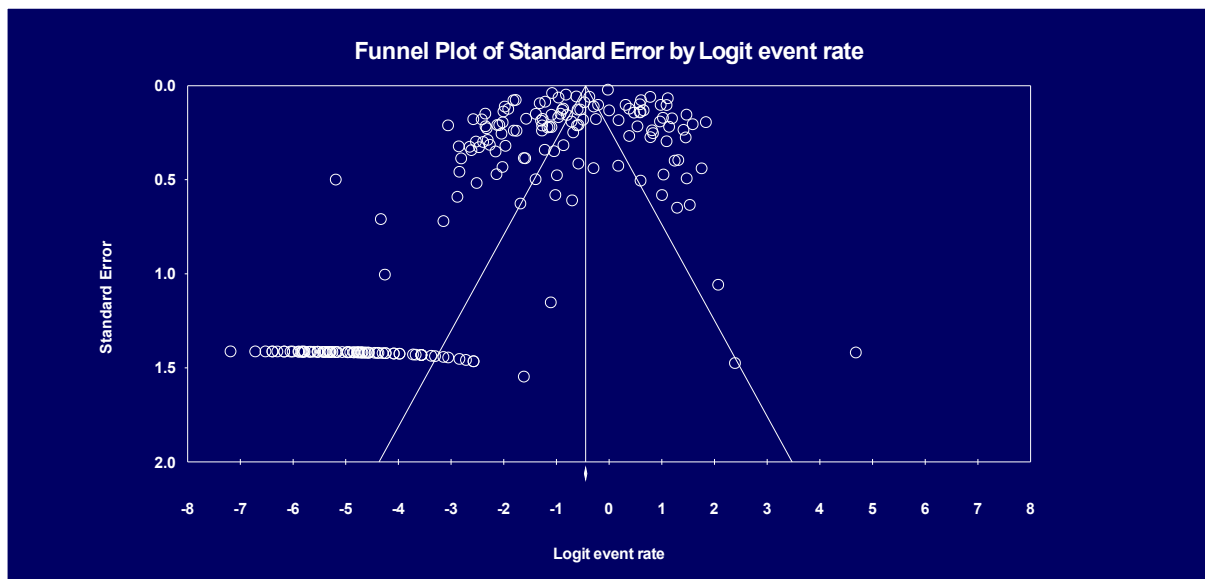

Egger p = 0.00000



## GENOTYPE C

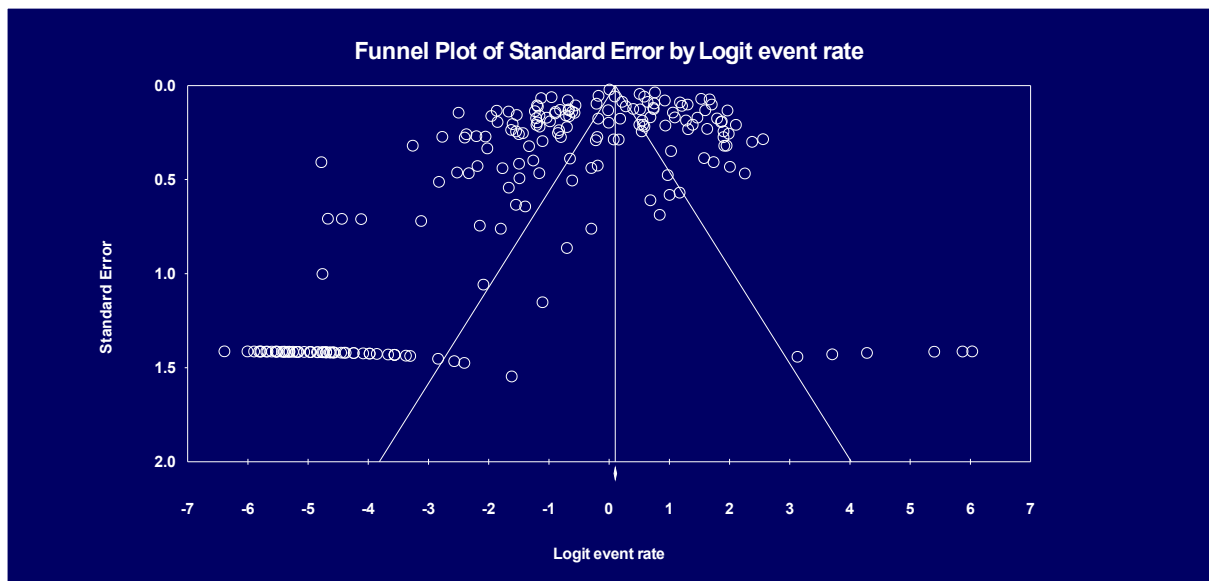

Egger p = 0.00001

## GENOTYPE D

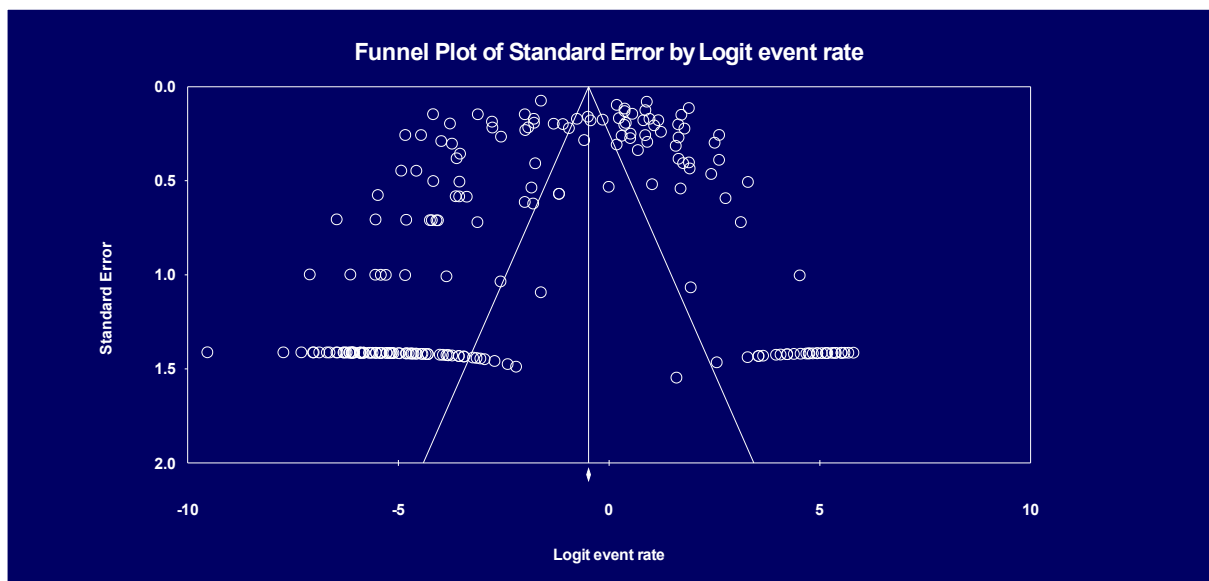

Egger p = 0.00043

## GENOTYPE E

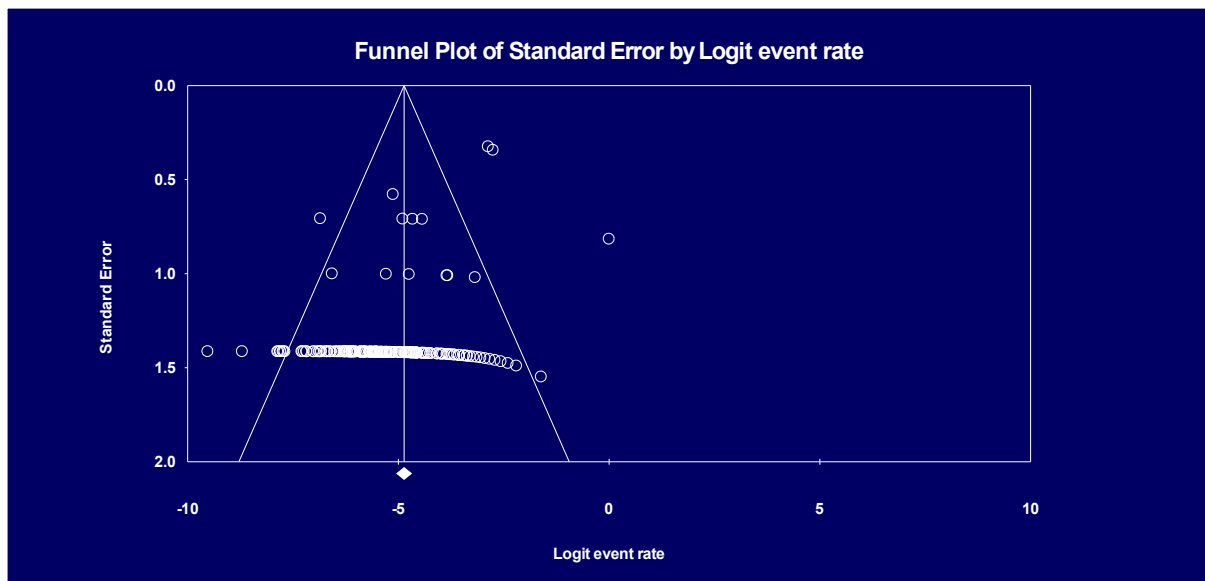

Egger p = 0.00000

## GENOTYPE F

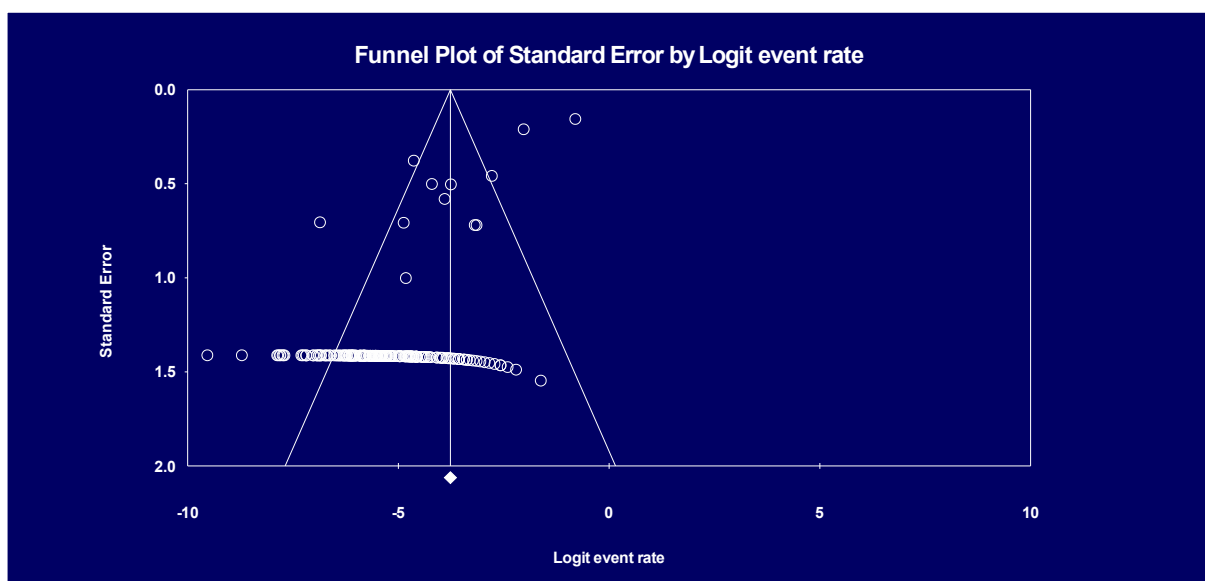

Egger p = 0.00000

## GENOTYPE G

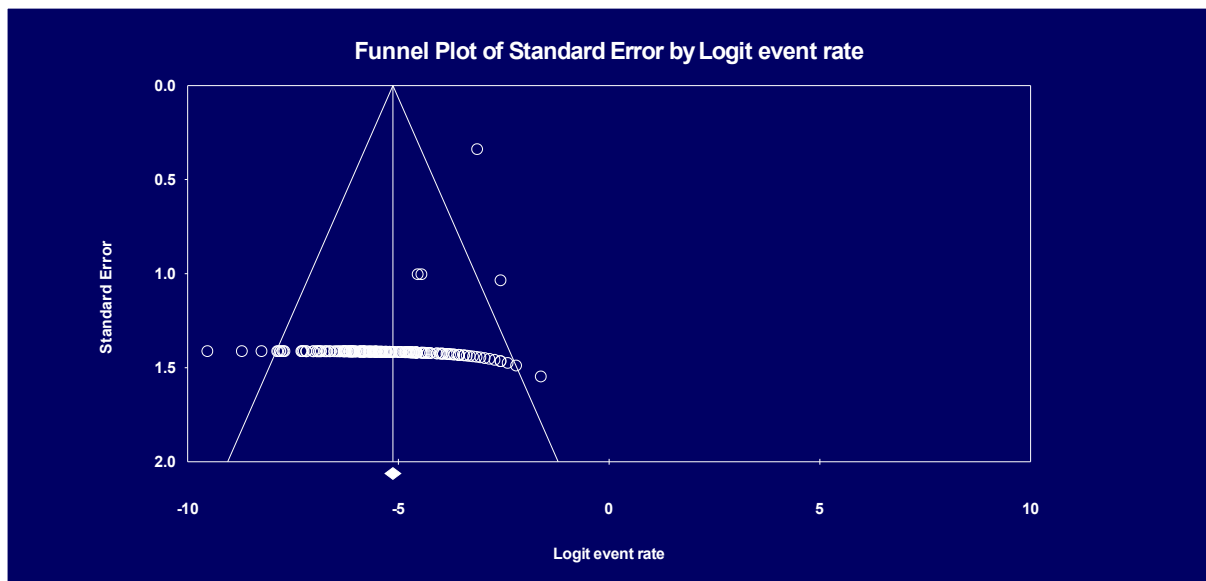

Egger p = 0.00000

## GENOTYPE H

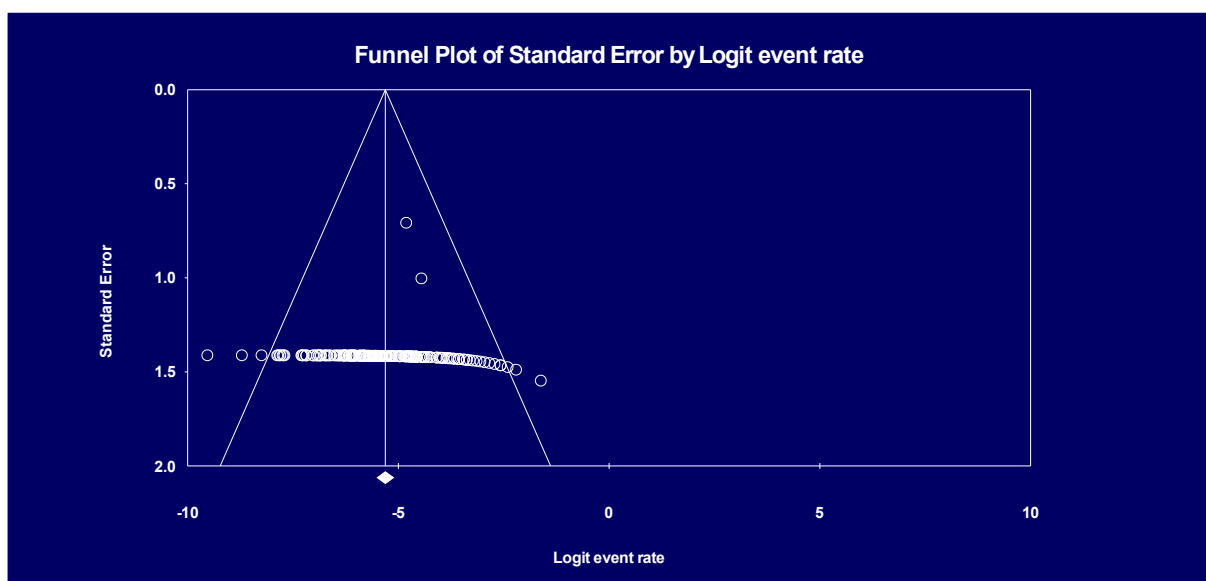

Egger p = 0.88283

## GENOTYPE I

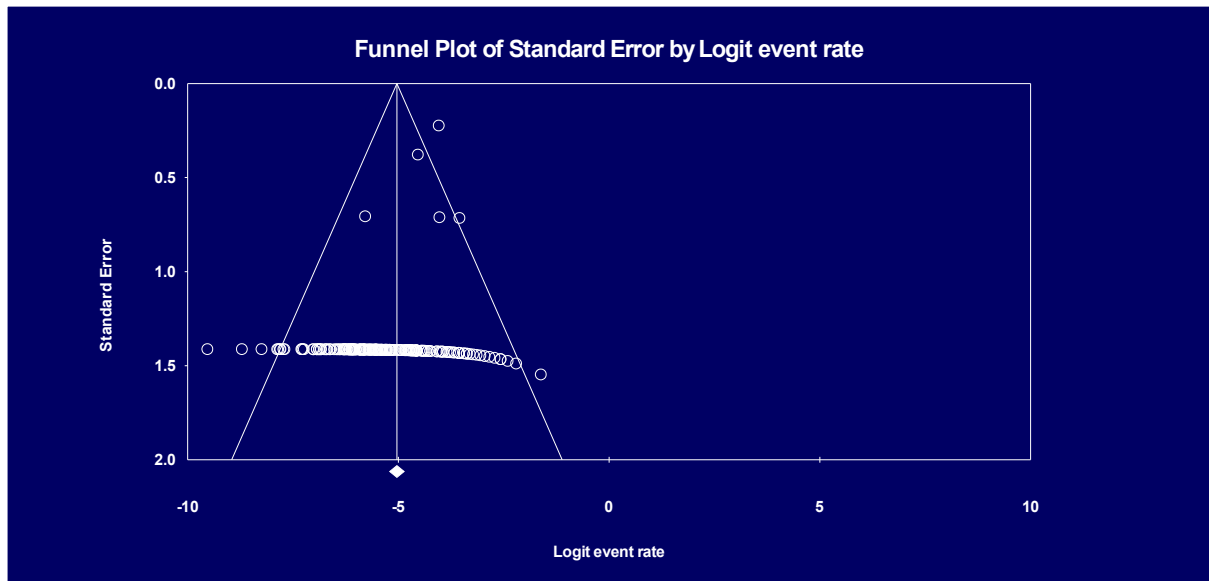

Egger p = 0.00000

## FOREST PLOT A

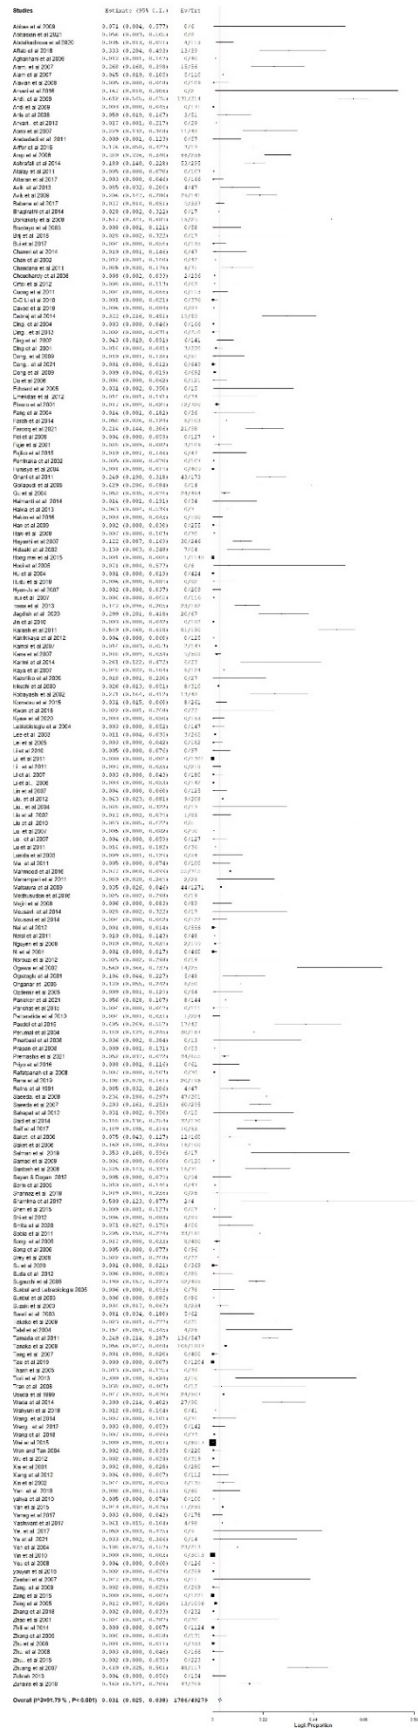

## FOREST PLOT B

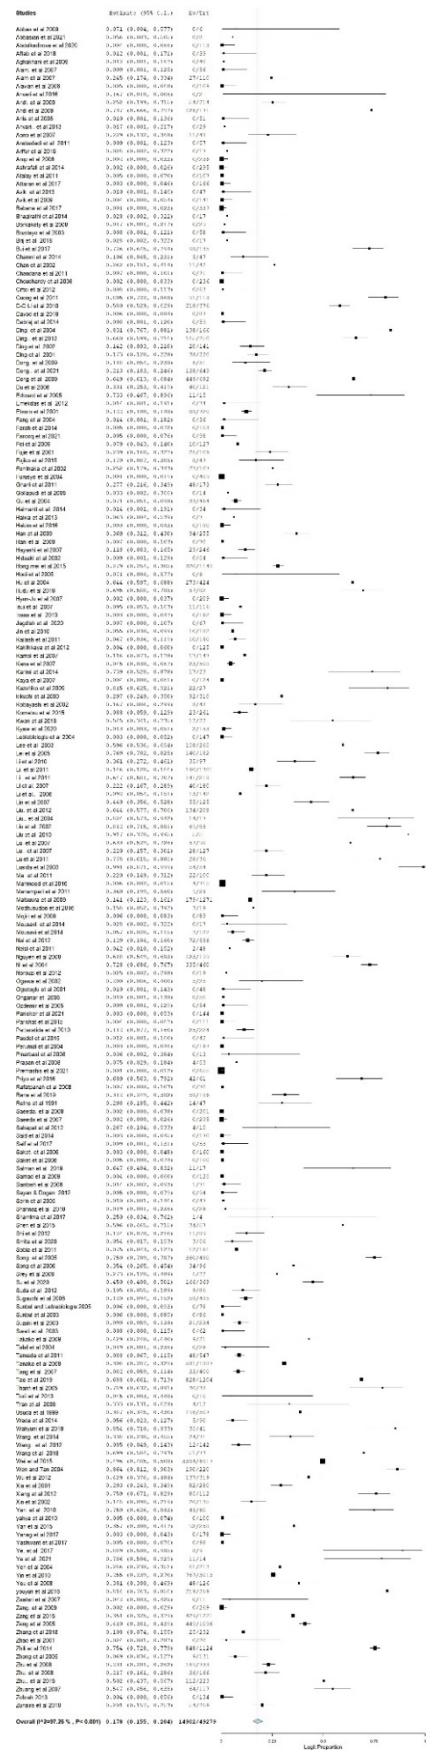

## FOREST PLOT C

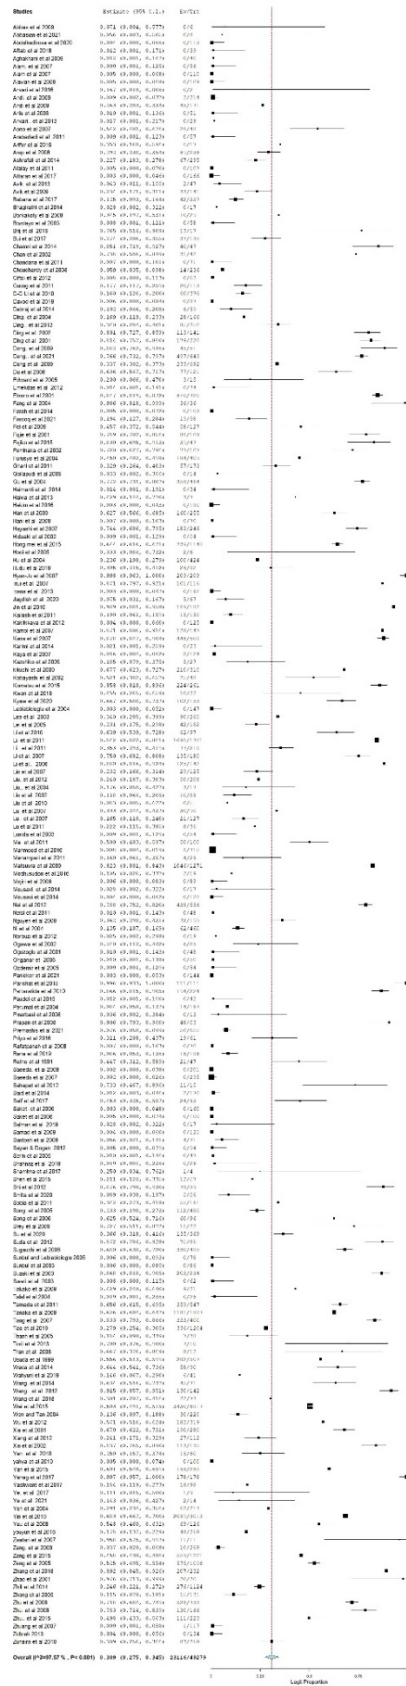

## FOREST PLOT D

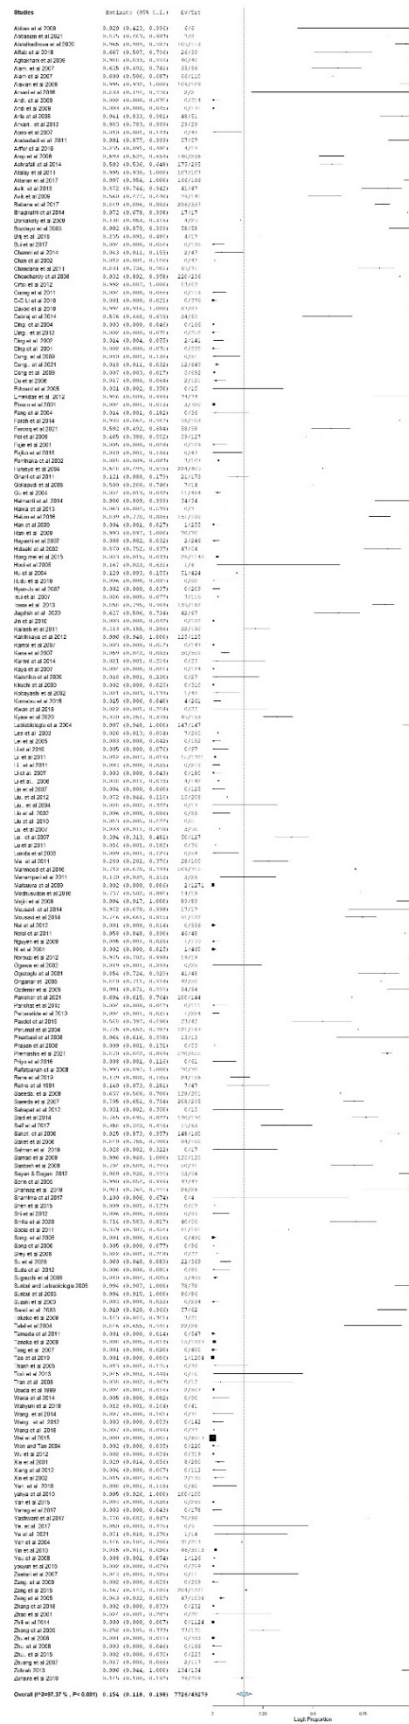



## FOREST PLOT E

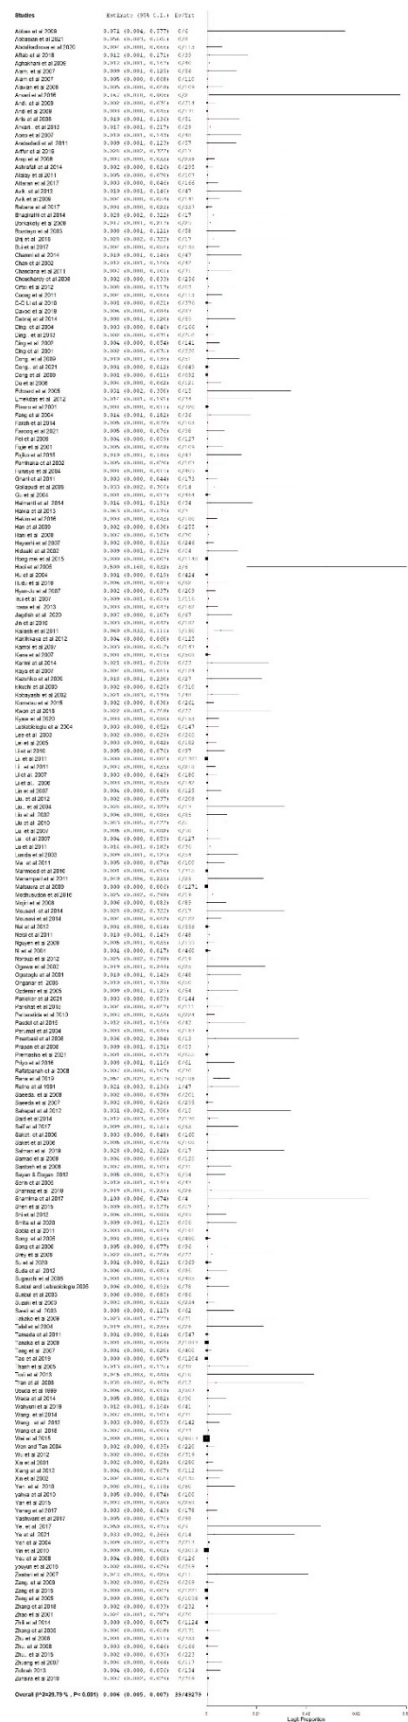

## FOREST PLOT F

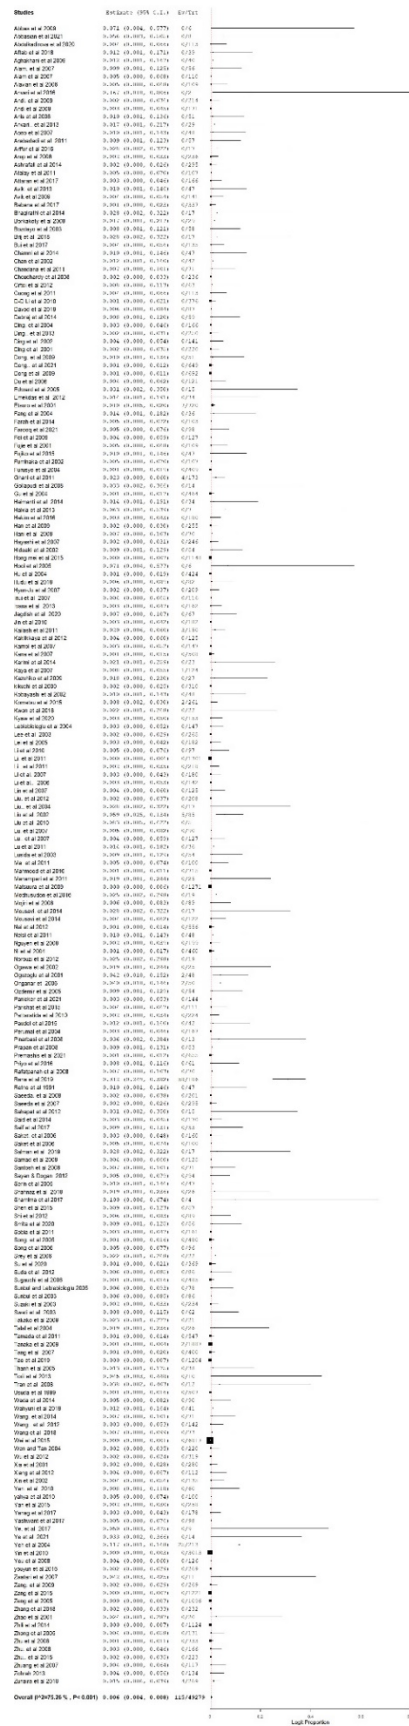

# FOREST PLOT G

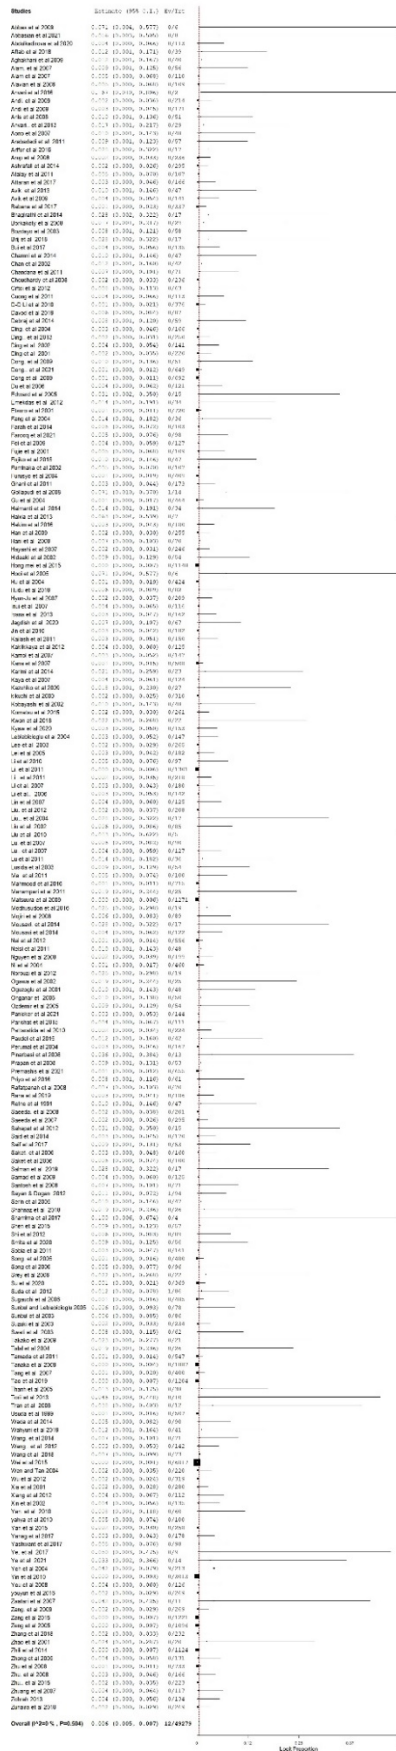



## FOREST PLOT I

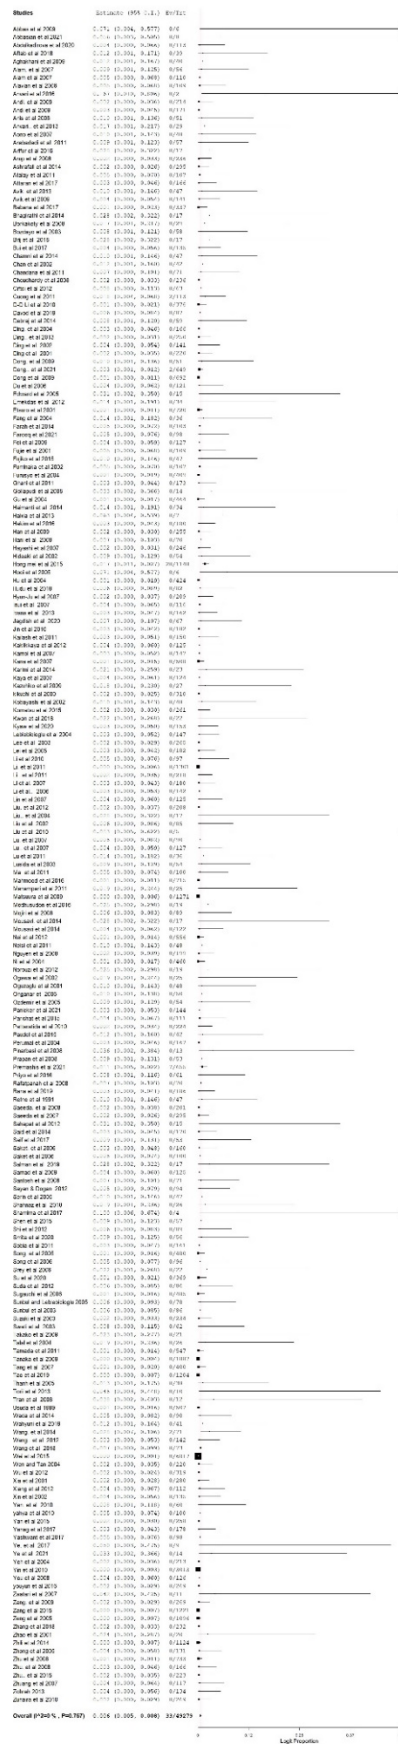



### SUBGROUP FOREST PLOT A

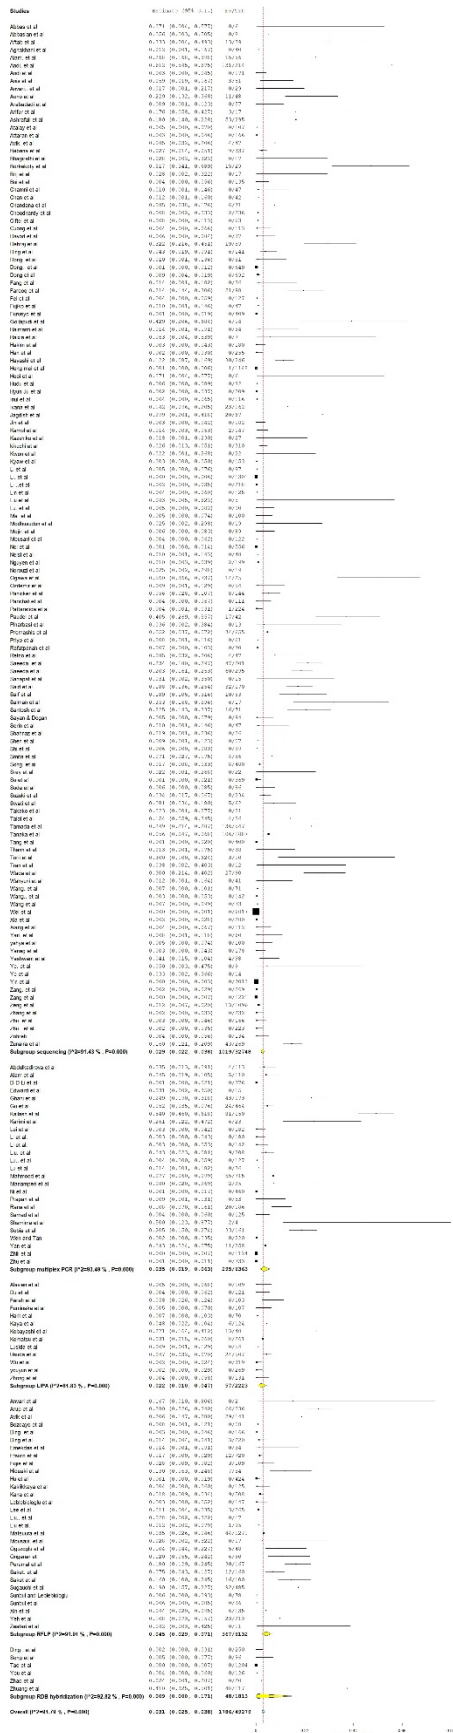

## SUBGROUP FOREST PLOT B

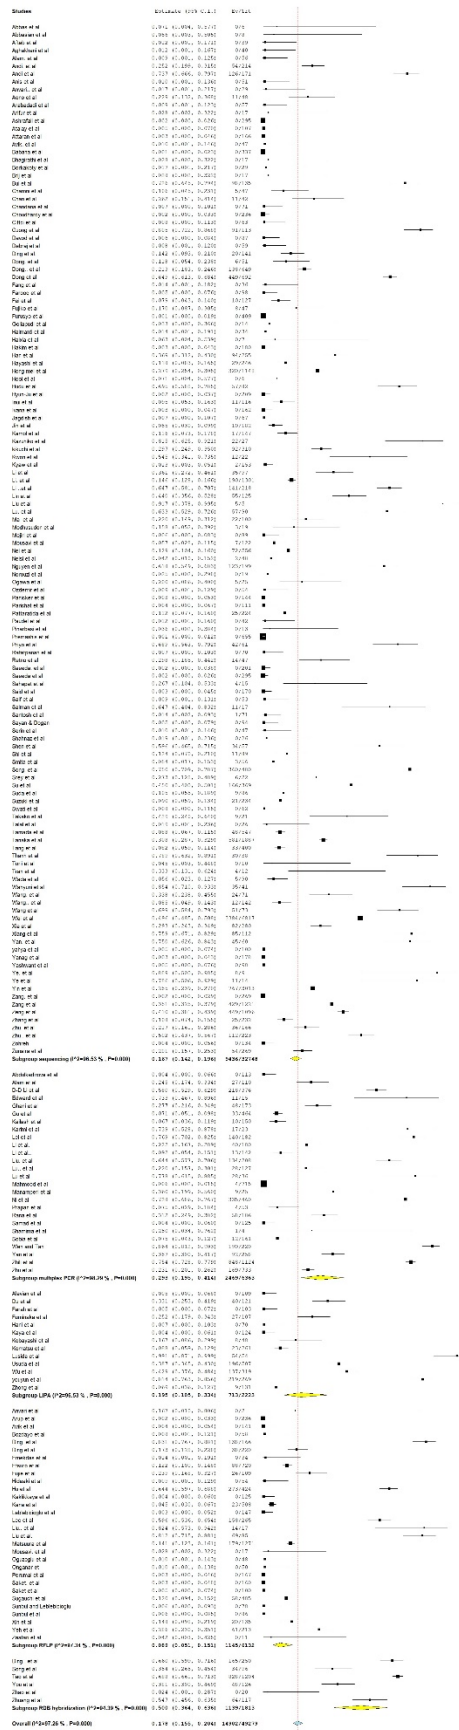



# SUBGROUP FOREST PLOT C

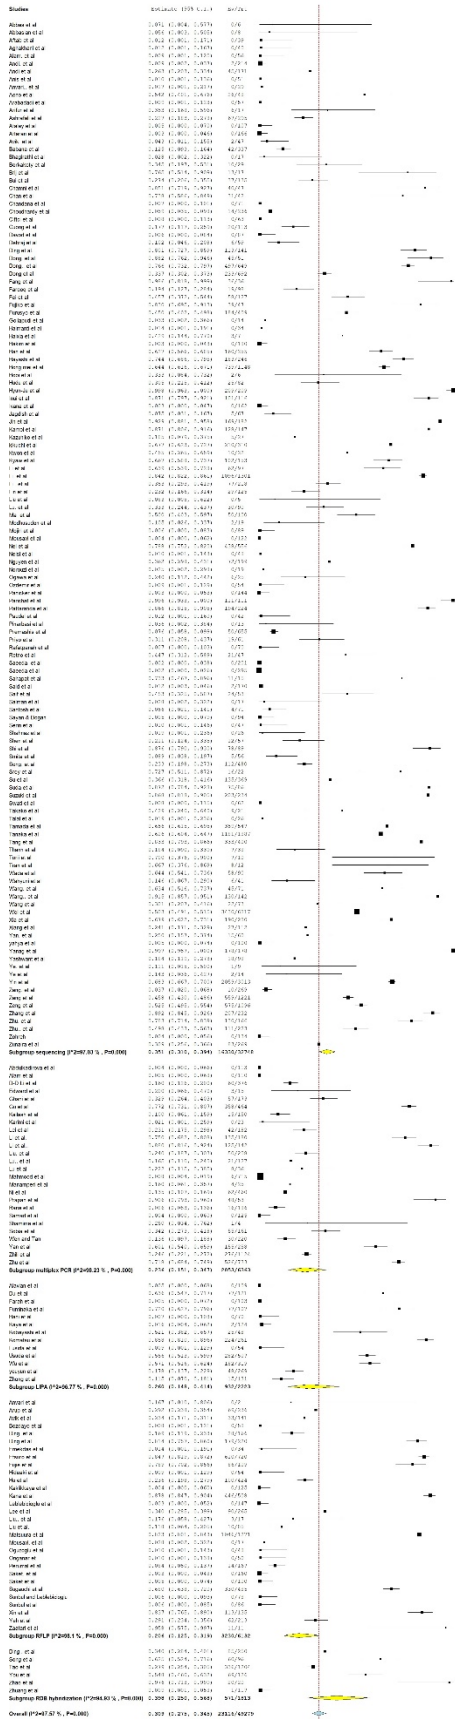

### SUBGROUP FOREST PLOT D

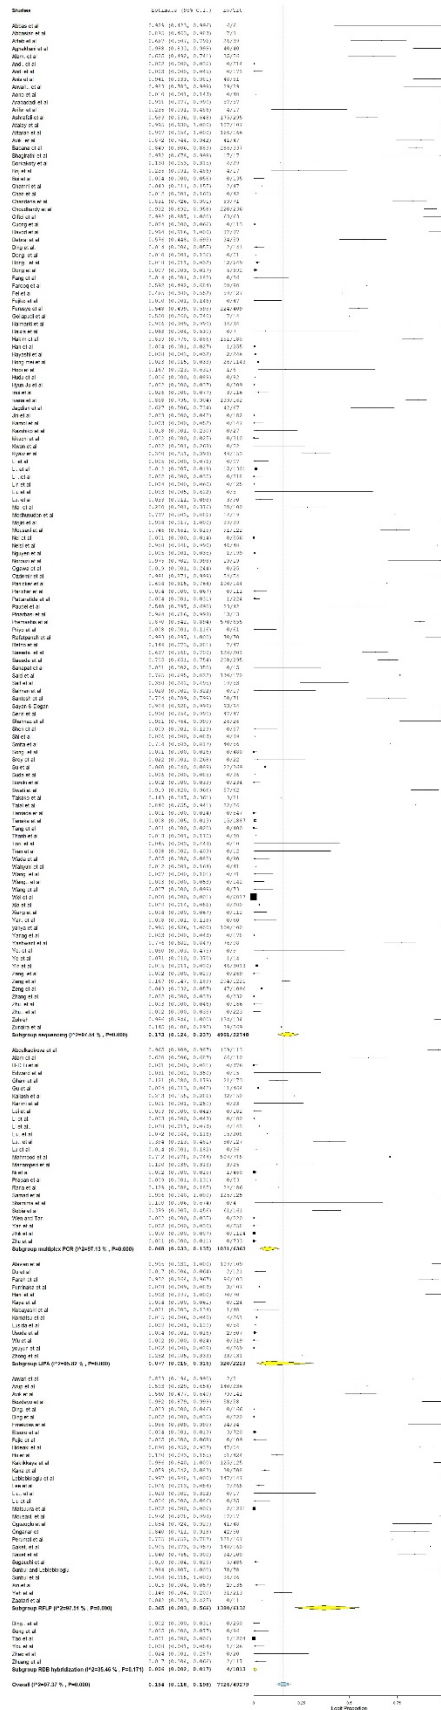

## SUBGROUP FOREST PLOT E

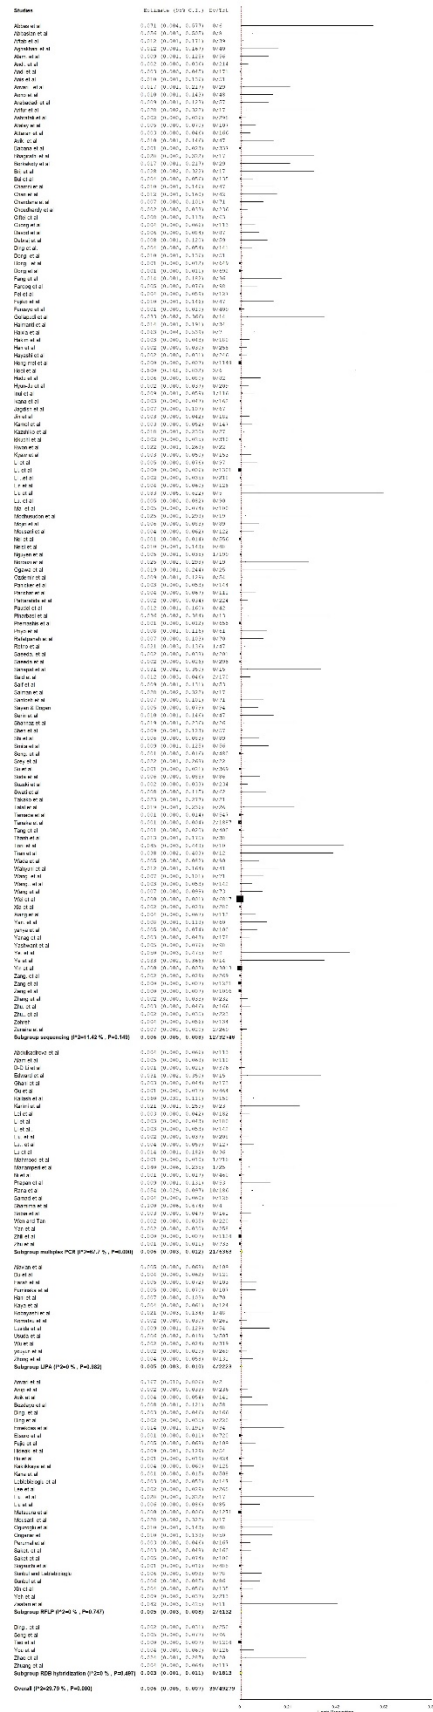

## SUBGROUP FOREST PLOT F

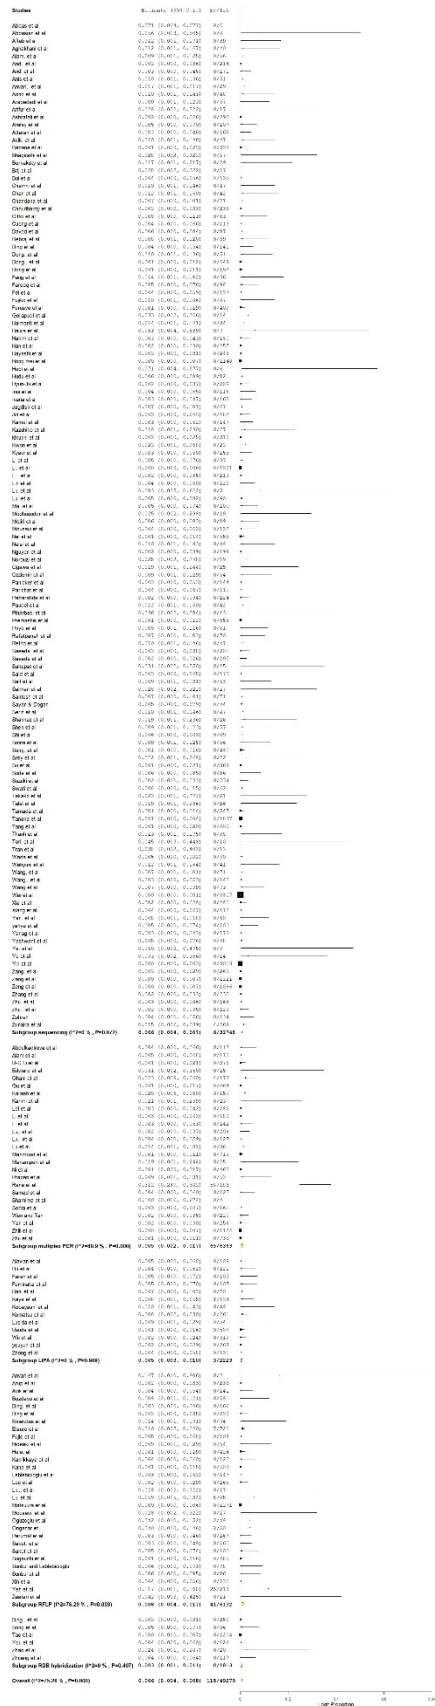



## SUBGROUP FOREST PLOT H

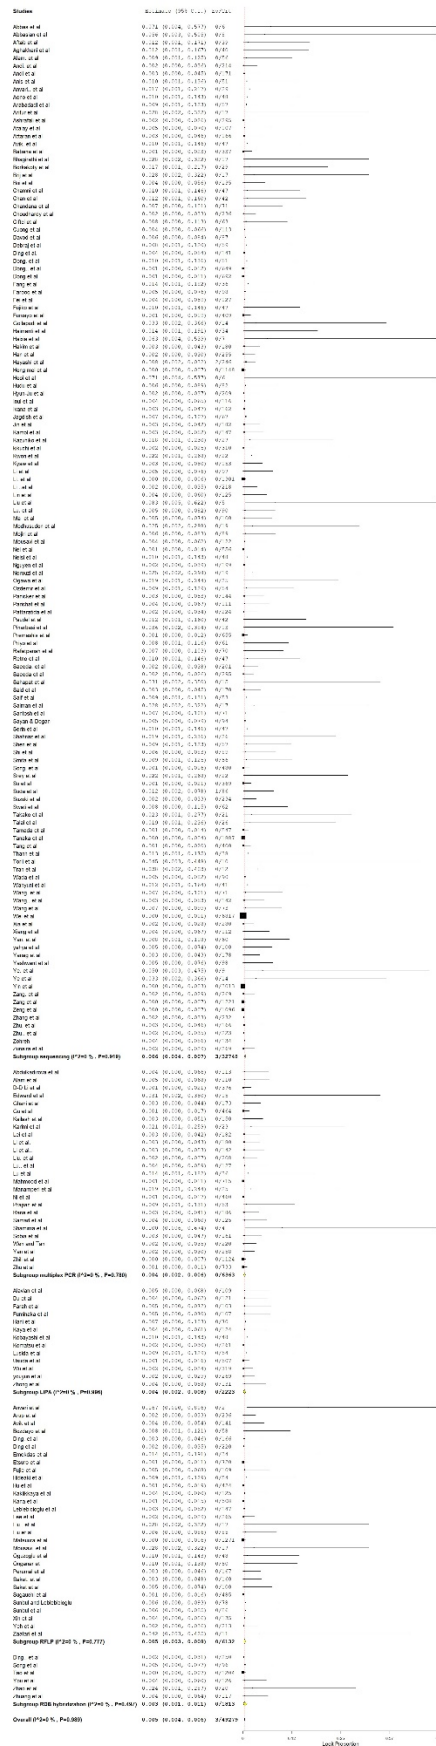

## SUBGROUP FOREST PLOT I

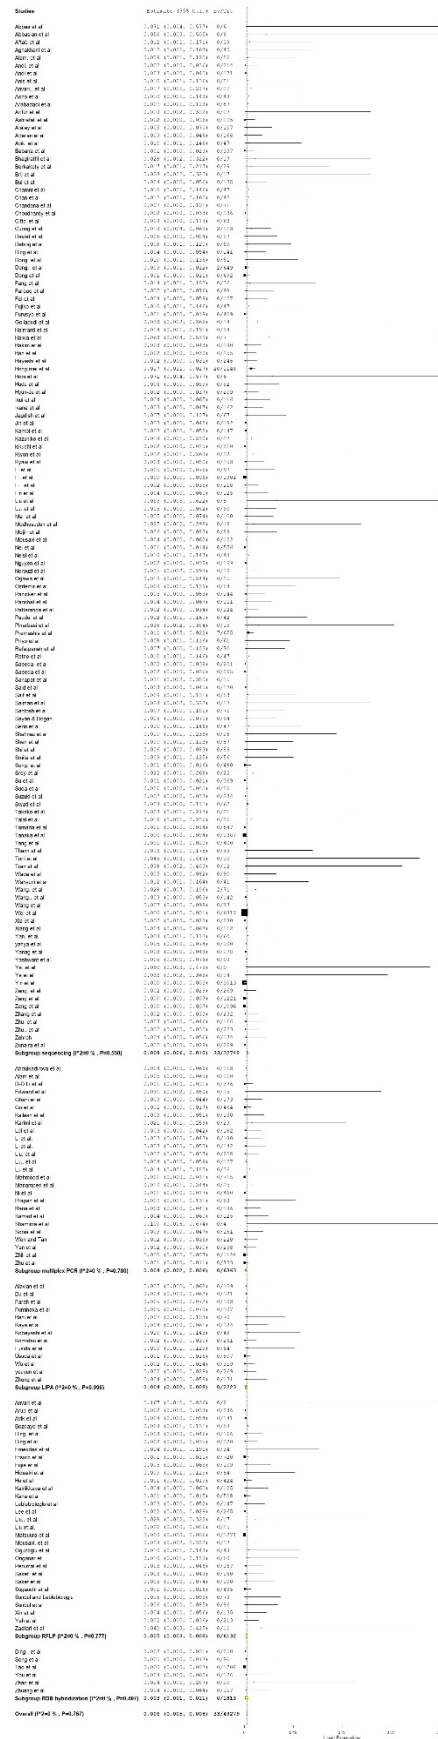





[illegible]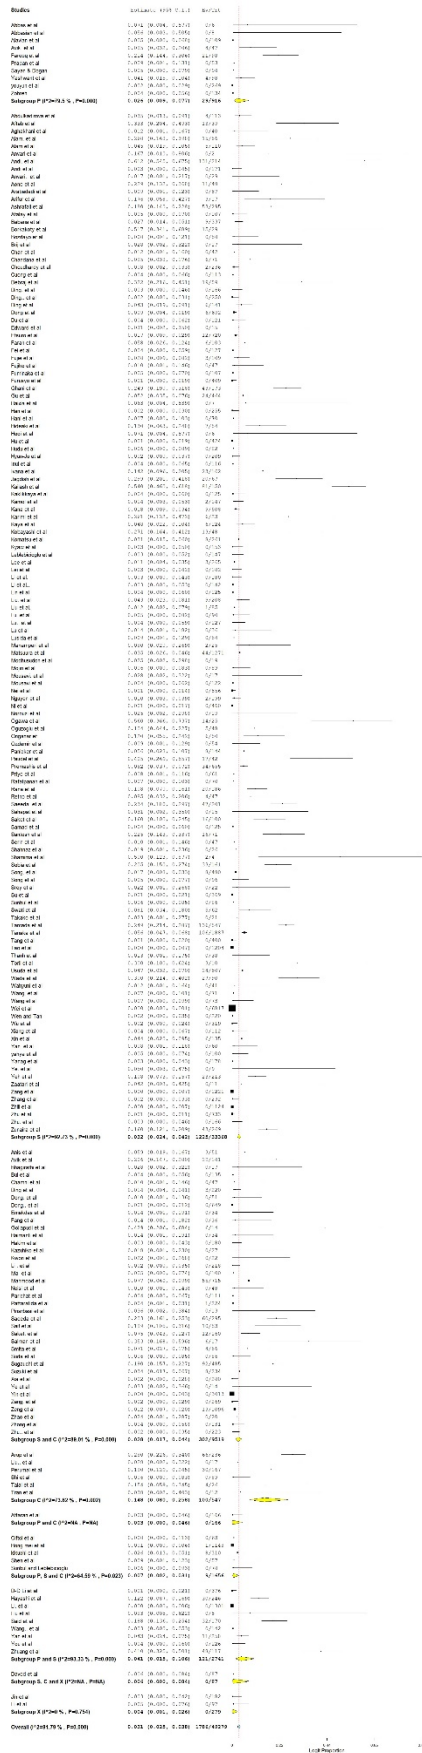

Figure 1: A large scatter plot showing the relationship between the number of reads (Y-axis, 0 to 100,000) and the number of genes (X-axis, 0 to 100,000). The plot is divided into several regions by dashed lines, representing different levels of gene expression. The regions are labeled with 'P' values (e.g., P=0.0001, P=0.001, P=0.01, P=0.05, P=0.1, P=0.5, P=1.0). The plot shows a strong positive correlation between the number of reads and the number of genes, with a dense cluster of points at low values and a more dispersed cluster at higher values. The plot is titled 'Figure 1' and includes a legend for the P values.

# SUBGROUP FOREST PLOT C

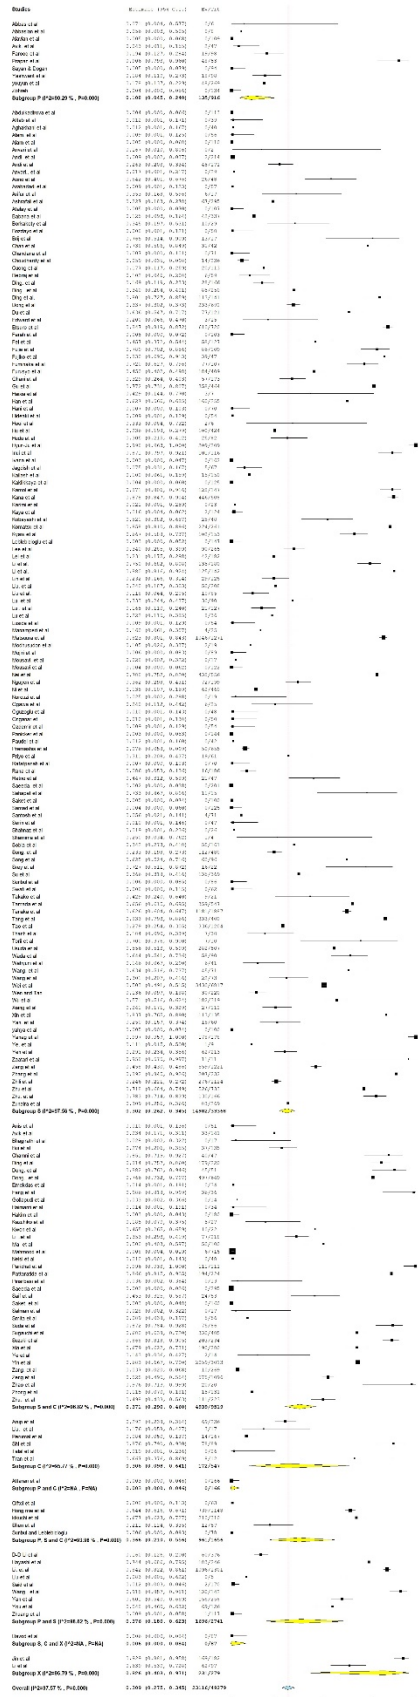

[illegible]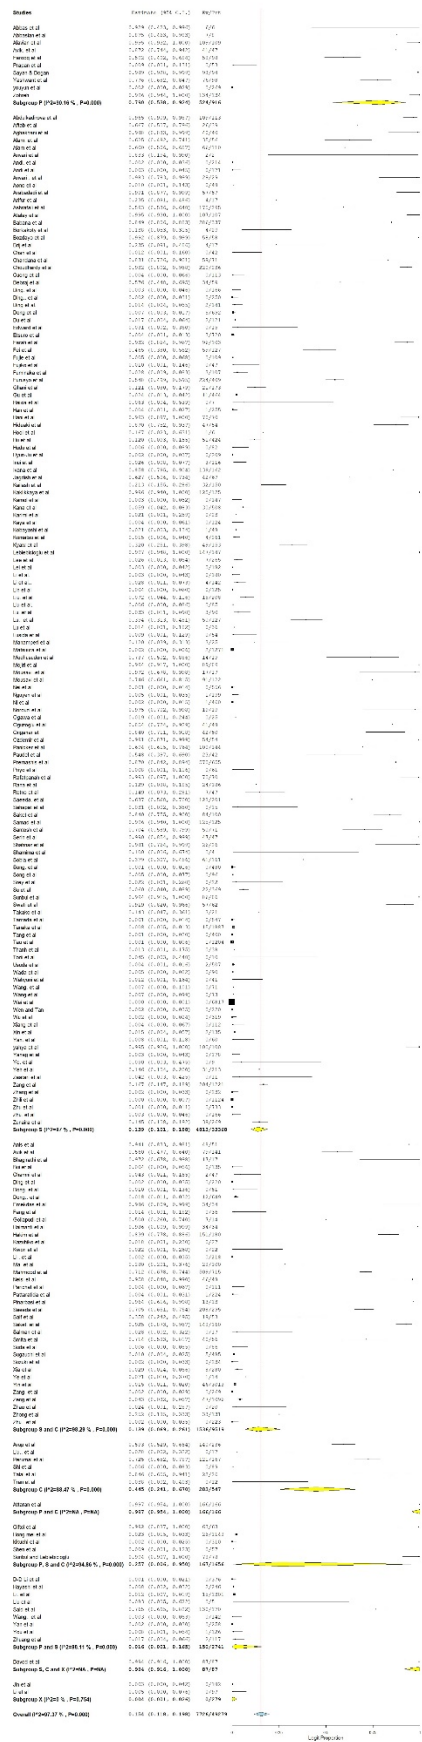

## SUBGROUP FOREST PLOT E

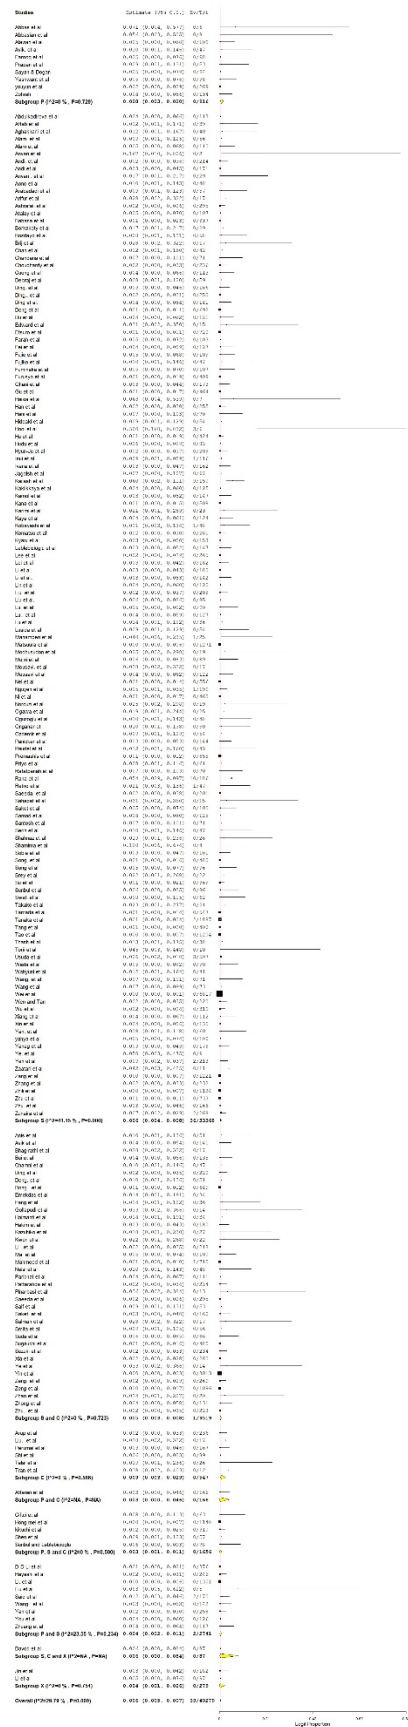

## SUBGROUP FOREST PLOT F

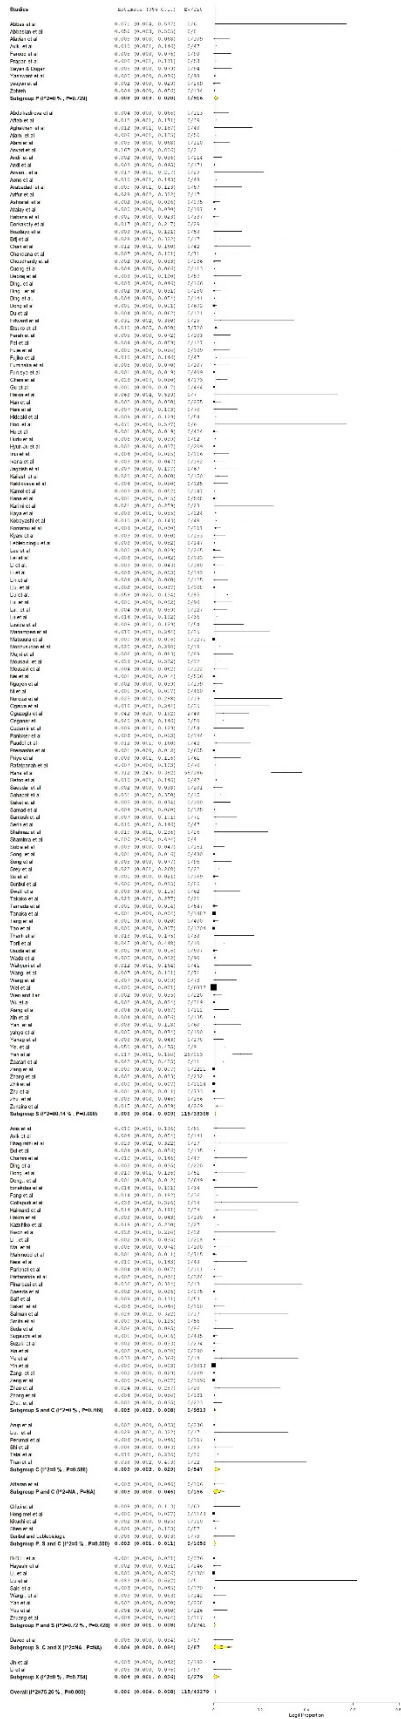

# SUBGROUP FORET PLOT G

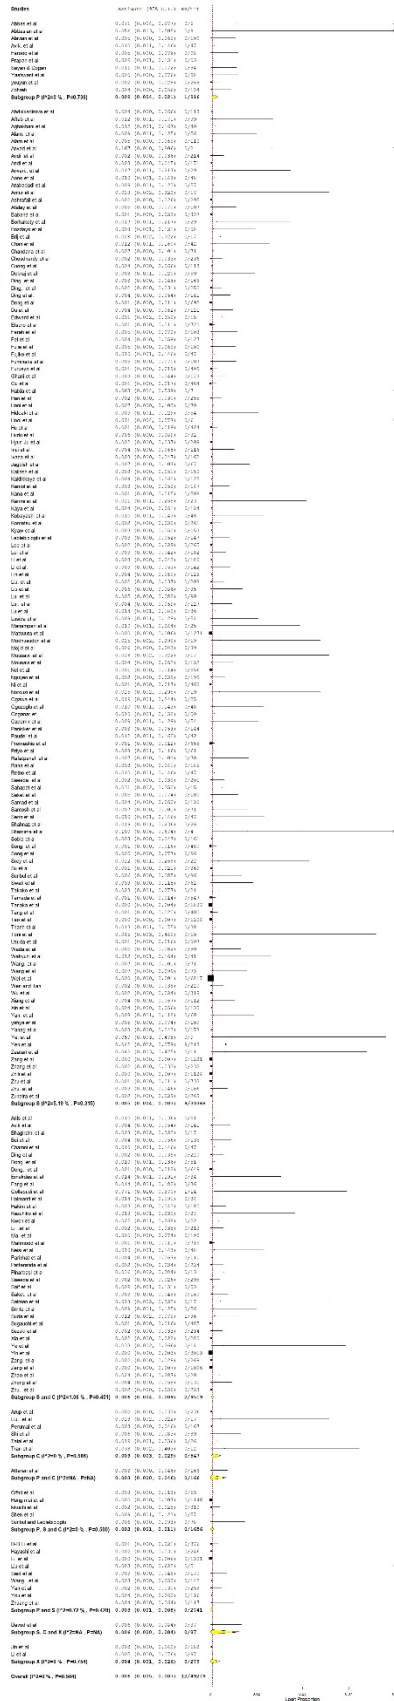

## SUBGROUP FOREST PLOT H

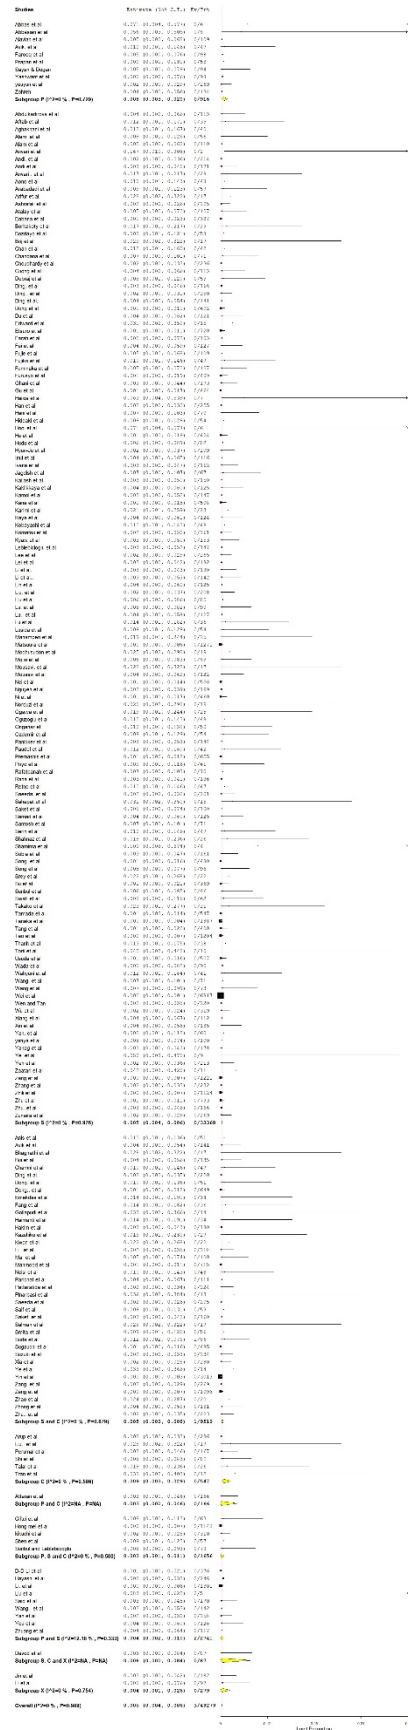



# SUBGROUP FOREST PLOT I

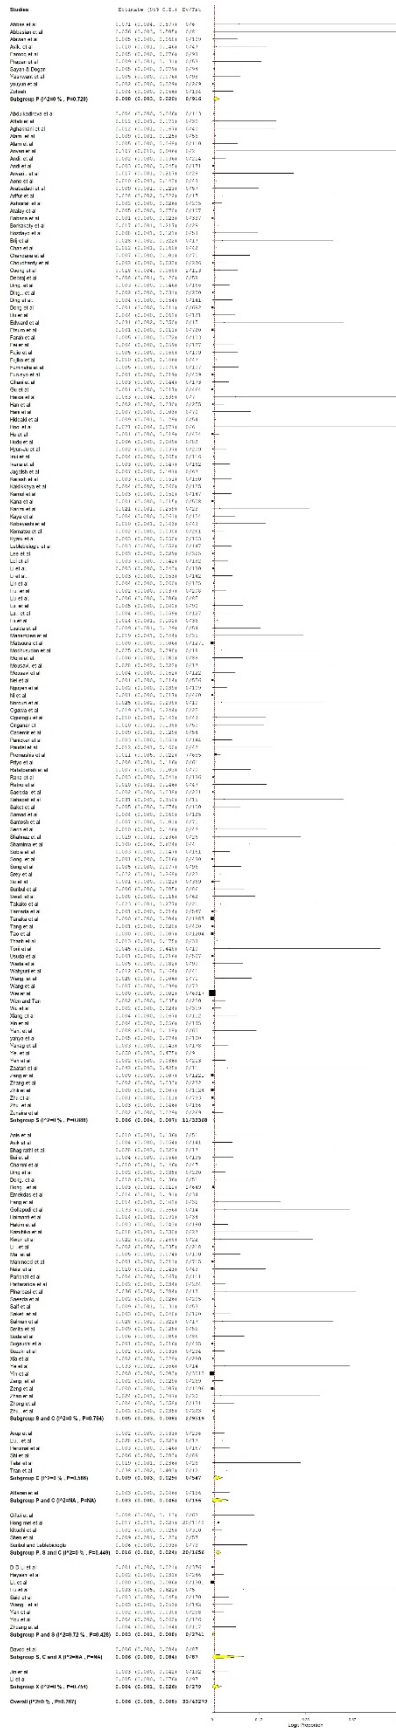



## FOREST PLOT AB

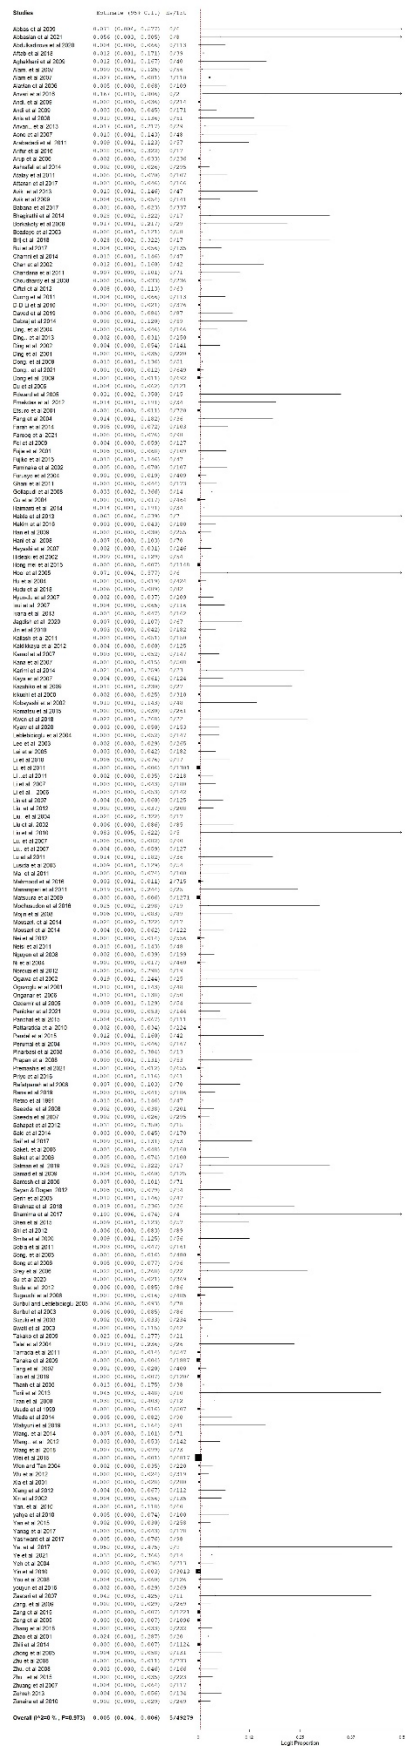

FOREST PLOT AC

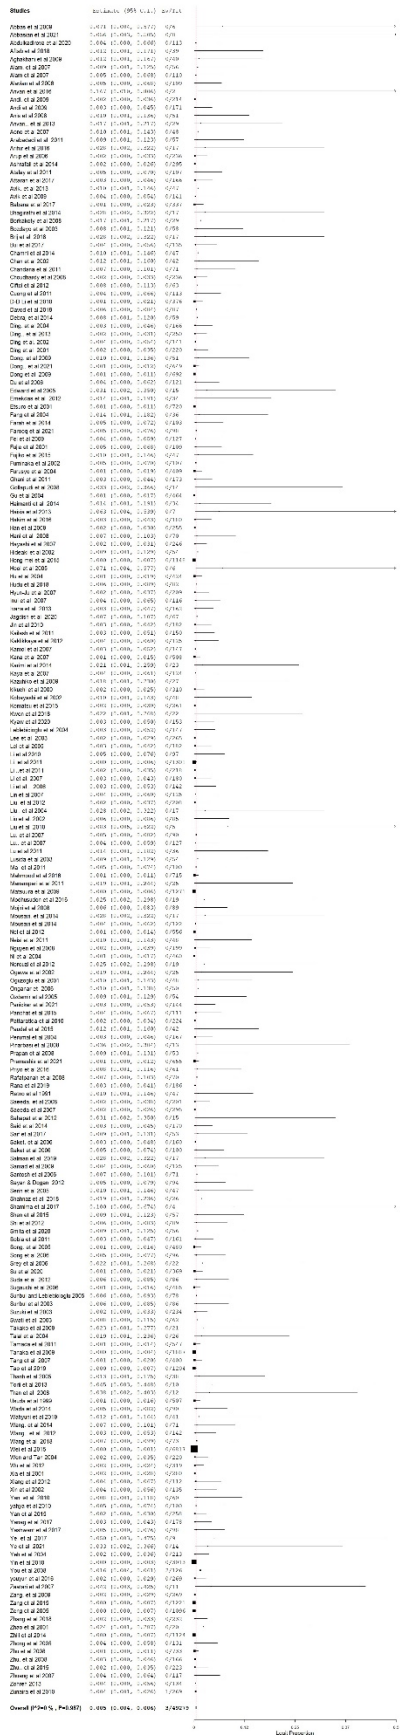

## FOREST PLOT AD

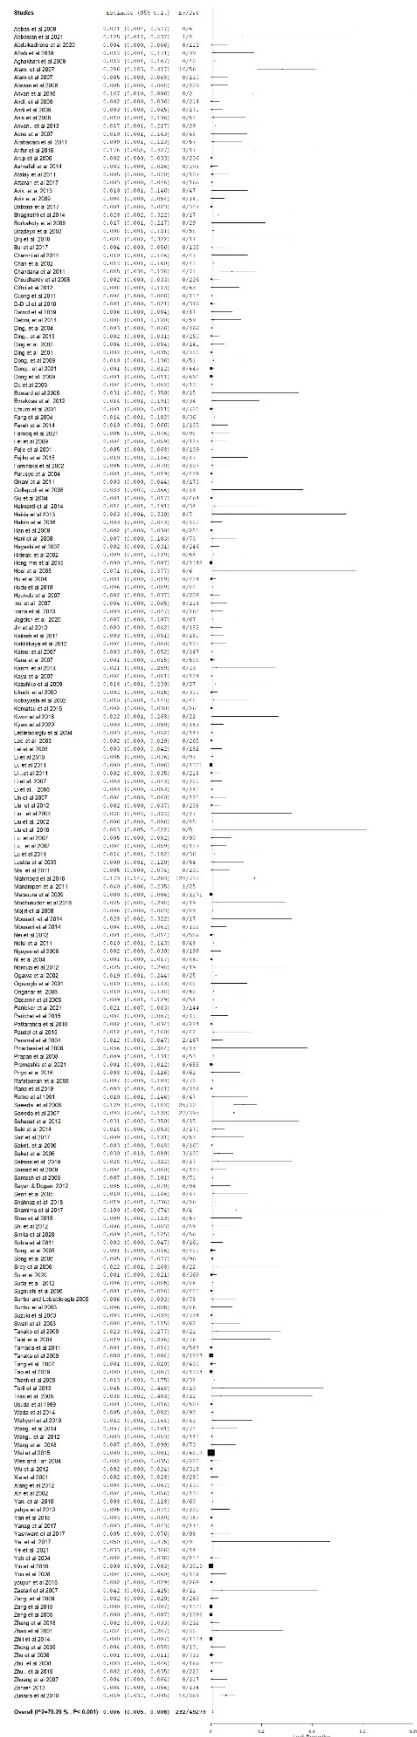

# FOREST PLOT AE

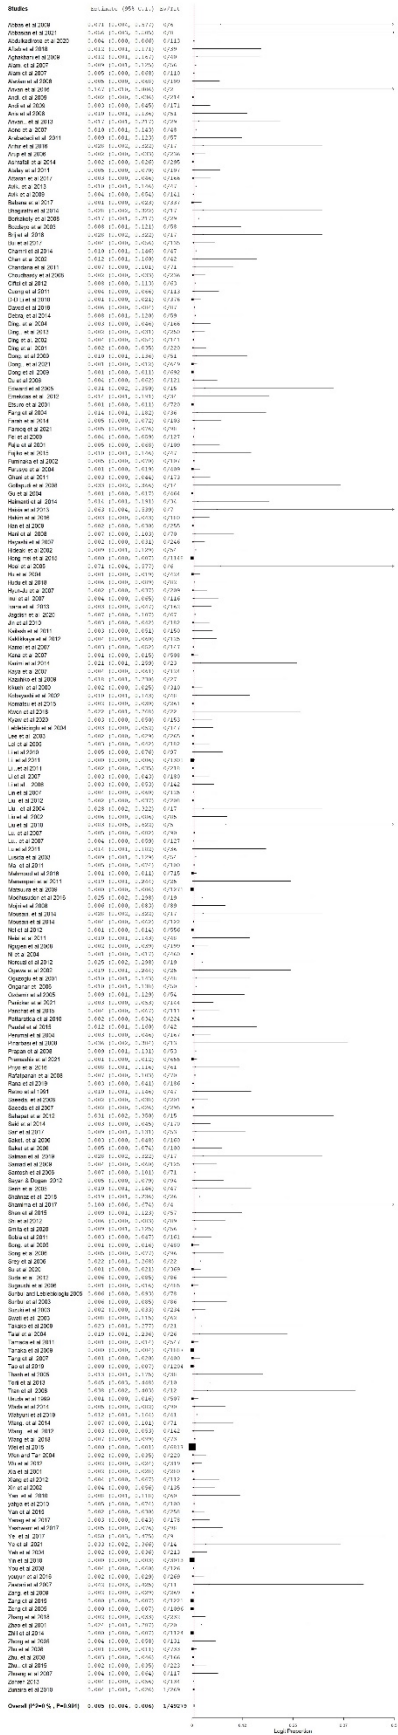

## FOREST PLOT AF

[illegible]

|                            |                      |           |
|----------------------------|----------------------|-----------|
| Overall (P=0.000, P=0.971) | 0.000 (0.004, 0.006) | 5/49279 * |
|----------------------------|----------------------|-----------|

## FORST PLOT BC

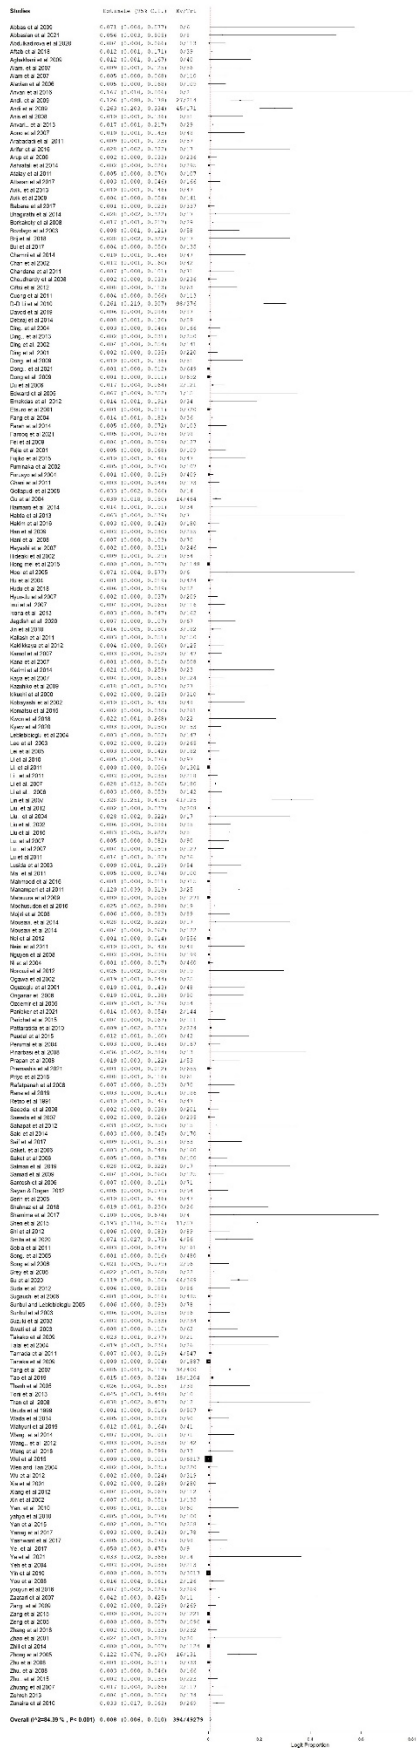



## FOREST PLOT BD

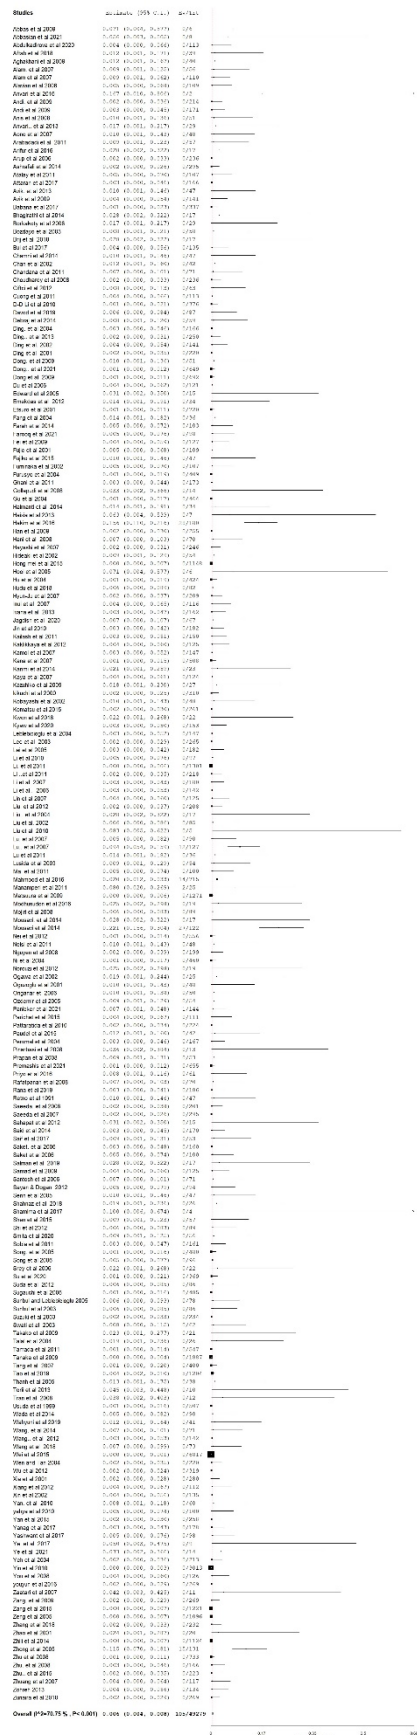

## FOREST PLOT BE

[illegible]

Overall (I<sup>2</sup>=62.78 %; P<0.001): 0.035 [0.004, 0.067] 117/45279

## FOREST PLOT CD

[illegible]

|      | 1    | 2    | 3    | 4 |
|------|------|------|------|---|
| 0.24 | 0.48 | 0.79 | 0.98 |   |

## FOREST PLOT ED

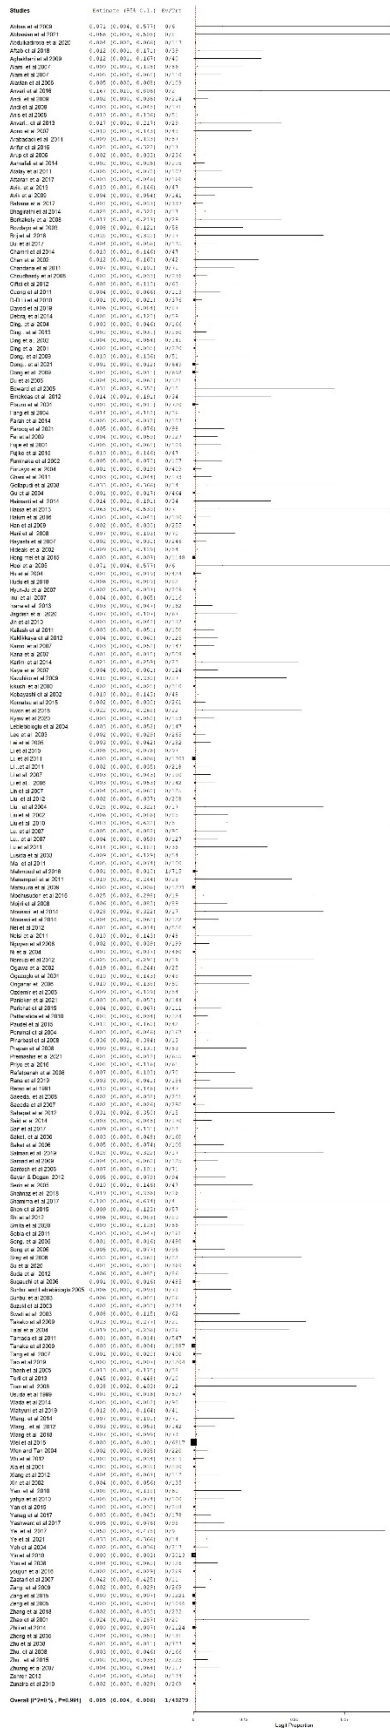



| Gene | Accession | Length (bp) | Start (bp) | End (bp) | Strand | RefSeq ID |
|------|-----------|-------------|------------|----------|--------|-----------|
| 1    | U1        | 100         | 100        | 100      | +      | U1        |
| 2    | U2        | 100         | 100        | 100      | +      | U2        |
| 3    | U3        | 100         | 100        | 100      | +      | U3        |
| 4    | U4        | 100         | 100        | 100      | +      | U4        |
| 5    | U5        | 100         | 100        | 100      | +      | U5        |
| 6    | U6        | 100         | 100        | 100      | +      | U6        |
| 7    | U7        | 100         | 100        | 100      | +      | U7        |
| 8    | U8        | 100         | 100        | 100      | +      | U8        |
| 9    | U9        | 100         | 100        | 100      | +      | U9        |
| 10   | U10       | 100         | 100        | 100      | +      | U10       |
| 11   | U11       | 100         | 100        | 100      | +      | U11       |
| 12   | U12       | 100         | 100        | 100      | +      | U12       |
| 13   | U13       | 100         | 100        | 100      | +      | U13       |
| 14   | U14       | 100         | 100        | 100      | +      | U14       |
| 15   | U15       | 100         | 100        | 100      | +      | U15       |
| 16   | U16       | 100         | 100        | 100      | +      | U16       |
| 17   | U17       | 100         | 100        | 100      | +      | U17       |
| 18   | U18       | 100         | 100        | 100      | +      | U18       |
| 19   | U19       | 100         | 100        | 100      | +      | U19       |
| 20   | U20       | 100         | 100        | 100      | +      | U20       |
| 21   | U21       | 100         | 100        | 100      | +      | U21       |
| 22   | U22       | 100         | 100        | 100      | +      | U22       |
| 23   | U23       | 100         | 100        | 100      | +      | U23       |
| 24   | U24       | 100         | 100        | 100      | +      | U24       |
| 25   | U25       | 100         | 100        | 100      | +      | U25       |
| 26   | U26       | 100         | 100        | 100      | +      | U26       |
| 27   | U27       | 100         | 100        | 100      | +      | U27       |
| 28   | U28       | 100         | 100        | 100      | +      | U28       |
| 29   | U29       | 100         | 100        | 100      | +      | U29       |
| 30   | U30       | 100         | 100        | 100      | +      | U30       |
| 31   | U31       | 100         | 100        | 100      | +      | U31       |
| 32   | U32       | 100         | 100        | 100      | +      | U32       |
| 33   | U33       | 100         | 100        | 100      | +      | U33       |
| 34   | U34       | 100         | 100        | 100      | +      | U34       |
| 35   | U35       | 100         | 100        | 100      | +      | U35       |
| 36   | U36       | 100         | 100        | 100      | +      | U36       |
| 37   | U37       | 100         | 100        | 100      | +      | U37       |
| 38   | U38       | 100         | 100        | 100      | +      | U38       |
| 39   | U39       | 100         | 100        | 100      | +      | U39       |
| 40   | U40       | 100         | 100        | 100      | +      | U40       |
| 41   | U41       | 100         | 100        | 100      | +      | U41       |
| 42   | U42       | 100         | 100        | 100      | +      | U42       |
| 43   | U43       | 100         | 100        | 100      | +      | U43       |
| 44   | U44       | 100         | 100        | 100      | +      | U44       |
| 45   | U45       | 100         | 100        | 100      | +      | U45       |
| 46   | U46       | 100         | 100        | 100      | +      | U46       |
| 47   | U47       | 100         | 100        | 100      | +      | U47       |
| 48   | U48       | 100         | 100        | 100      | +      | U48       |
| 49   | U49       | 100         | 100        | 100      | +      | U49       |
| 50   | U50       | 100         | 100        | 100      | +      | U50       |
| 51   | U51       | 100         | 100        | 100      | +      | U51       |
| 52   | U52       | 100         | 100        | 100      | +      | U52       |
| 53   | U53       | 100         | 100        | 100      | +      | U53       |
| 54   | U54       | 100         | 100        | 100      | +      | U54       |
| 55   | U55       | 100         | 100        | 100      | +      | U55       |
| 56   | U56       | 100         | 100        | 100      | +      | U56       |
| 57   | U57       | 100         | 100        | 100      | +      | U57       |
| 58   | U58       | 100         | 100        | 100      | +      | U58       |
| 59   | U59       | 100         | 100        | 100      | +      | U59       |
| 60   | U60       | 100         | 100        | 100      | +      | U60       |
| 61   | U61       | 100         | 100        | 100      | +      | U61       |
| 62   | U62       | 100         | 100        | 100      | +      | U62       |
| 63   | U63       | 100         | 100        | 100      | +      | U63       |
| 64   | U64       | 100         | 100        | 100      | +      | U64       |
| 65   | U65       | 100         | 100        | 100      | +      | U65       |
| 66   | U66       | 100         | 100        | 100      | +      | U66       |
| 67   | U67       | 100         | 100        | 100      | +      | U67       |
| 68   | U68       | 100         | 100        | 100      | +      | U68       |
| 69   | U69       | 100         | 100        | 100      | +      | U69       |
| 70   | U70       | 100         | 100        | 100      | +      | U70       |
| 71   | U71       | 100         | 100        | 100      | +      |           |

[illegible]

Figure 1 displays a genomic map and analysis of a specific region, likely on chromosome 1. The top section shows a chromosome ideogram with a color scale from 0 to 250 Mb. Below this, a detailed view of a genomic region is presented, showing a dense array of genes and their transcripts. The genes are labeled with names such as *PIT-1*, *PIT-2*, *PIT-3*, *PIT-4*, *PIT-5*, *PIT-6*, *PIT-7*, *PIT-8*, *PIT-9*, *PIT-10*, *PIT-11*, *PIT-12*, *PIT-13*, *PIT-14*, *PIT-15*, *PIT-16*, *PIT-17*, *PIT-18*, *PIT-19*, *PIT-20*, *PIT-21*, *PIT-22*, *PIT-23*, *PIT-24*, *PIT-25*, *PIT-26*, *PIT-27*, *PIT-28*, *PIT-29*, *PIT-30*, *PIT-31*, *PIT-32*, *PIT-33*, *PIT-34*, *PIT-35*, *PIT-36*, *PIT-37*, *PIT-38*, *PIT-39*, *PIT-40*, *PIT-41*, *PIT-42*, *PIT-43*, *PIT-44*, *PIT-45*, *PIT-46*, *PIT-47*, *PIT-48*, *PIT-49*, *PIT-50*, *PIT-51*, *PIT-52*, *PIT-53*, *PIT-54*, *PIT-55*, *PIT-56*, *PIT-57*, *PIT-58*, *PIT-59*, *PIT-60*, *PIT-61*, *PIT-62*, *PIT-63*, *PIT-64*, *PIT-65*, *PIT-66*, *PIT-67*, *PIT-68*, *PIT-69*, *PIT-70*, *PIT-71*, *PIT-72*, *PIT-73*, *PIT-74*, *PIT-75*, *PIT-76*, *PIT-77*, *PIT-78*, *PIT-79*, *PIT-80*, *PIT-81*, *PIT-82*, *PIT-83*, *PIT-84*, *PIT-85*, *PIT-86*, *PIT-87*, *PIT-88*, *PIT-89*, *PIT-90*, *PIT-91*, *PIT-92*, *PIT-93*, *PIT-94*, *PIT-95*, *PIT-96*, *PIT-97*, *PIT-98*, *PIT-99*, *PIT-100*, *PIT-101*, *PIT-102*, *PIT-103*, *PIT-104*, *PIT-105*, *PIT-106*, *PIT-107*, *PIT-108*, *PIT-109*, *PIT-110*, *PIT-111*, *PIT-112*, *PIT-113*, *PIT-114*, *PIT-115*, *PIT-116*, *PIT-117*, *PIT-118*, *PIT-119*, *PIT-120*, *PIT-121*, *PIT-122*, *PIT-123*, *PIT-124*, *PIT-125*, *PIT-126*, *PIT-127*, *PIT-128*, *PIT-129*, *PIT-130*, *PIT-131*, *PIT-132*, *PIT-133*, *PIT-134*, *PIT-135*, *PIT-136*, *PIT-137*, *PIT-138*, *PIT-139*, *PIT-140*, *PIT-141*, *PIT-142*, *PIT-143*, *PIT-144*, *PIT-145*, *PIT-146*, *PIT-147*, *PIT-148*, *PIT-149*, *PIT-150*, *PIT-151*, *PIT-152*, *PIT-153*, *PIT-154*, *PIT-155*, *PIT-156*, *PIT-157*, *PIT-158*, *PIT-159*, *PIT-160*, *PIT-161*, *PIT-162*, *PIT-163*, *PIT-164*, *PIT-165*, *PIT-166*, *PIT-167*, *PIT-168*, *PIT-169*, *PIT-170*, *PIT-171*, *PIT-172*, *PIT-173*, *PIT-174*, *PIT-175*, *PIT-176*, *PIT-177*, *PIT-178*, *PIT-179*, *PIT-180*, *PIT-181*, *PIT-182*, *PIT-183*, *PIT-184*, *PIT-185*, *PIT-186*, *PIT-187*, *PIT-188*, *PIT-189*, *PIT-190*, *PIT-191*, *PIT-192*, *PIT-193*, *PIT-194*, *PIT-195*, *PIT-196*, *PIT-197*, *PIT-198*, *PIT-199*, *PIT-200*, *PIT-201*, *PIT-202*, *PIT-203*, *PIT-204*, *PIT-205*, *PIT-206*, *PIT-207*, *PIT-208*, *PIT-209*, *PIT-210*, *PIT-211*, *PIT-212*, *PIT-213*, *PIT-214*, *PIT-215*, *PIT-216*, *PIT-217*, *PIT-218*, *PIT-219*, *PIT-220*, *PIT-221*, *PIT-222*, *PIT-223*, *PIT-224*, *PIT-225*, *PIT-226*, *PIT-227*, *PIT-228*, *PIT-229*, *PIT-230*, *PIT-231*, *PIT-232*, *PIT-233*, *PIT-234*, *PIT-235*, *PIT-236*, *PIT-237*, *PIT-238*, *PIT-239*, *PIT-240*, *PIT-241*, *PIT-242*, *PIT-243*, *PIT-244*, *PIT-245*, *PIT-246*, *PIT-247*, *PIT-248*, *PIT-249*, *PIT-250*, *PIT-251*, *PIT-252*, *PIT-253*, *PIT-254*, *PIT-255*, *PIT-256*, *PIT-257*, *PIT-258*, *PIT-259*, *PIT-260*, *PIT-261*, *PIT-262*, *PIT-263*, *PIT-264*, *PIT-265*, *PIT-266*, *PIT-267*, *PIT-268*, *PIT-269*, *PIT-270*, *PIT-271*, *PIT-272*, *PIT-273*, *PIT-274*, *PIT-275*, *PIT-276*, *PIT-277*, *PIT-278*, *PIT-279*, *PIT-280*, *PIT-281*, *PIT-282*, *PIT-283*, *PIT-284*, *PIT-285*, *PIT-286*, *PIT-287*, *PIT-288*, *PIT-289*, *PIT-290*, *PIT-291*, *PIT-292*, *PIT-293*, *PIT-294*, *PIT-295*, *PIT-296*, *PIT-297*, *PIT-298*, *PIT-299*, *PIT-300*, *PIT-301*, *PIT-302*, *PIT-303*, *PIT-304*, *PIT-305*, *PIT-306*, *PIT-307*, *PIT-308*, *PIT-309*, *PIT-310*, *PIT-311*, *PIT-312*, *PIT-313*, *PIT-314*, *PIT-315*, *PIT-316*, *PIT-317*, *PIT-318*, *PIT-319*, *PIT-320*, *PIT-321*, *PIT-322*, *PIT-323*, *PIT-324*, *PIT-325*, *PIT-326*, *PIT-327*, *PIT-328*, *PIT-329*, *PIT-330*, *PIT-331*, *PIT-332*, *PIT-333*, *PIT-334*, *PIT-335*, *PIT-336*, *PIT-337*, *PIT-338*, *PIT-339*, *PIT-340*, *PIT-341*, *PIT-342*, *PIT-343*, *PIT-344*, *PIT-345*, *PIT-346*, *PIT-347*, *PIT-348*, *PIT-349*, *PIT-350*, *PIT-351*, *PIT-352*, *PIT-353*, *PIT-354*, *PIT-355*, *PIT-356*, *PIT-357*, *PIT-358*, <



[illegible]

# SUBGROUP FOREST PLOT E

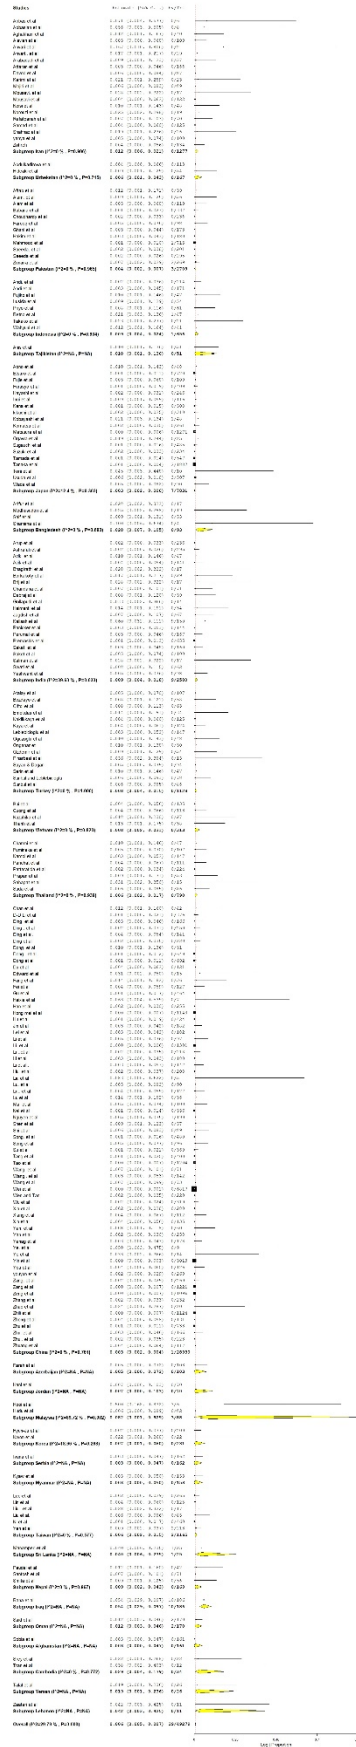

# SUBGROUP FOREST PLOT F

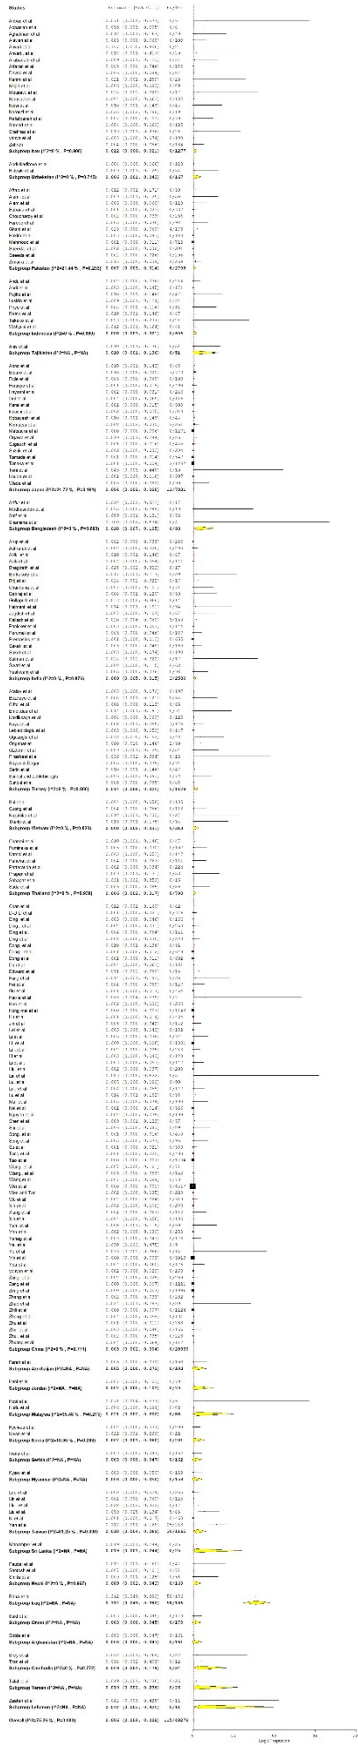

# SUBGROUP FOREST PLOT G

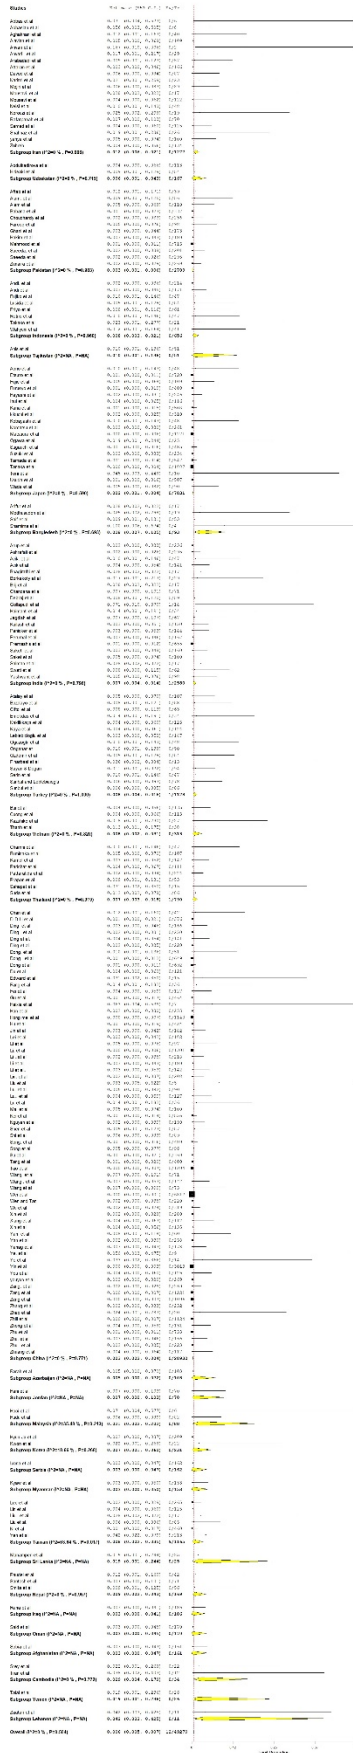

# SUBGROUP FOREST PLOT H

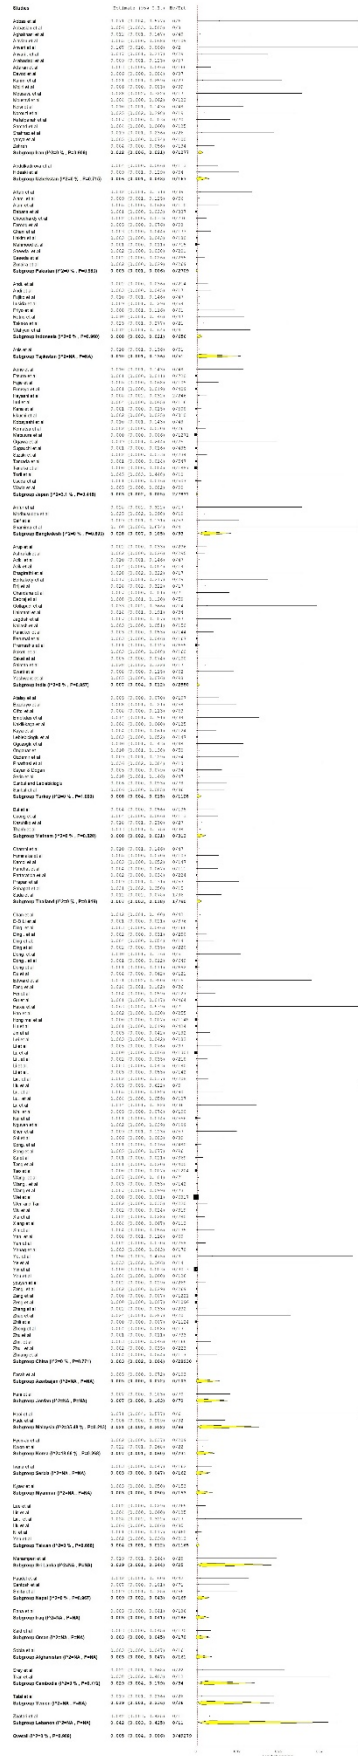

# SUBGROUP FOREST PLOT I

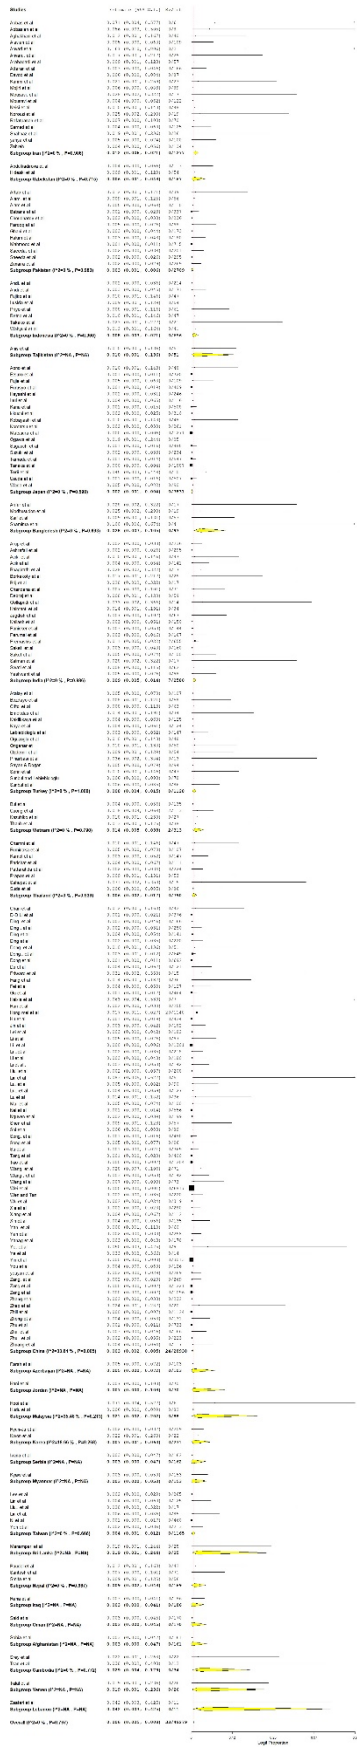



## FOREST PLOT ABC

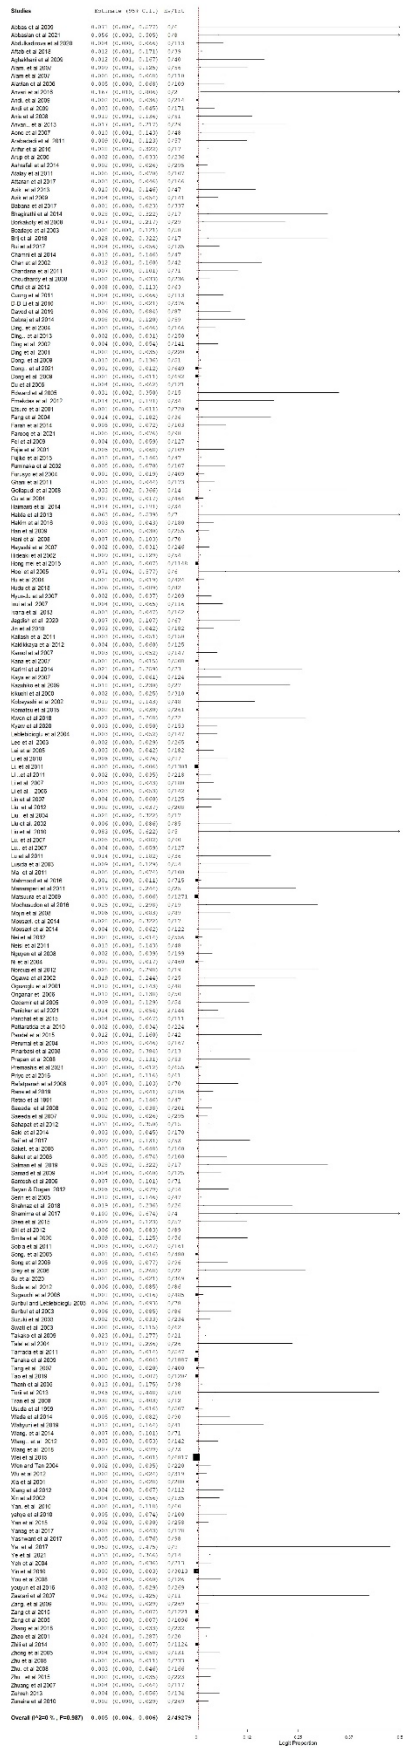



## FOREST PLOT ABD

[illegible]

## FOREST PLOT ACD

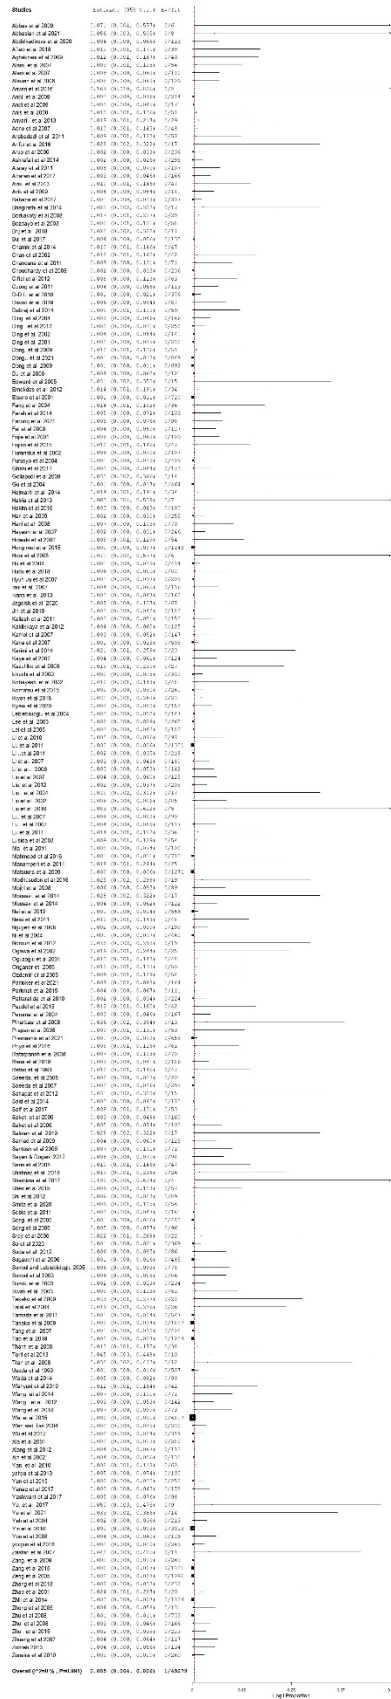

## FOREST PLOT BCD

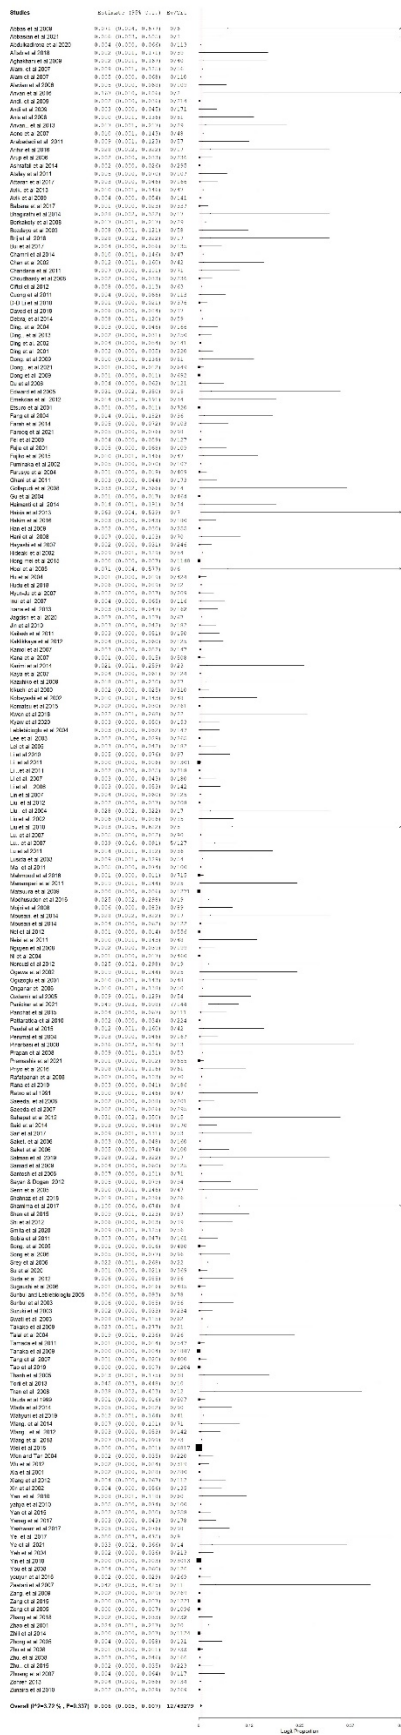

# FOREST PLOT BCDE

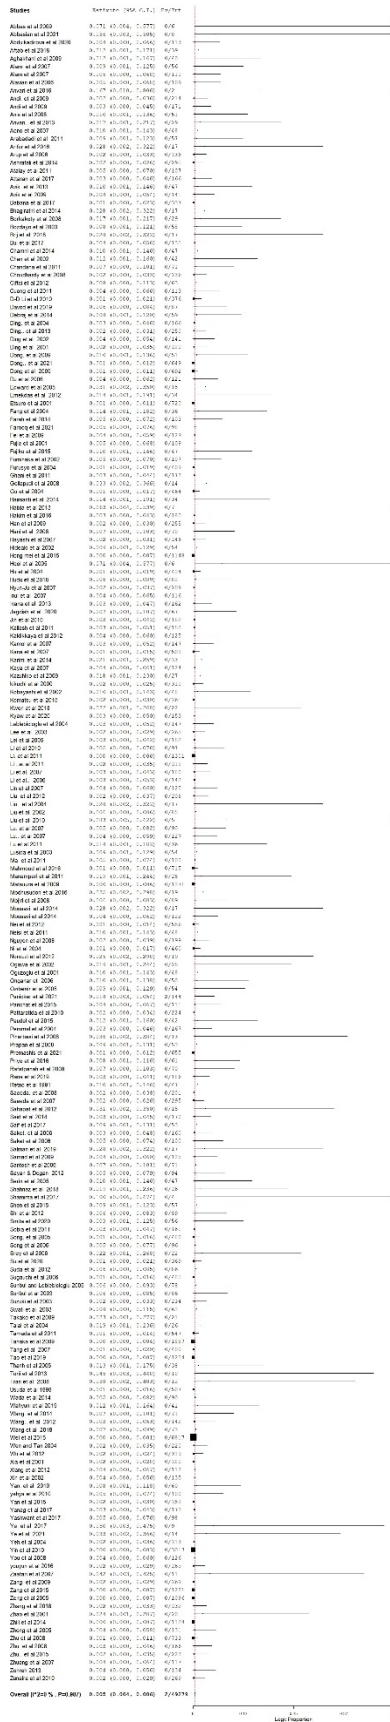



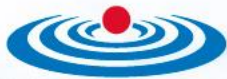

THE JOANNA BRIGGS INSTITUTE  
*Better evidence. Better outcomes.*

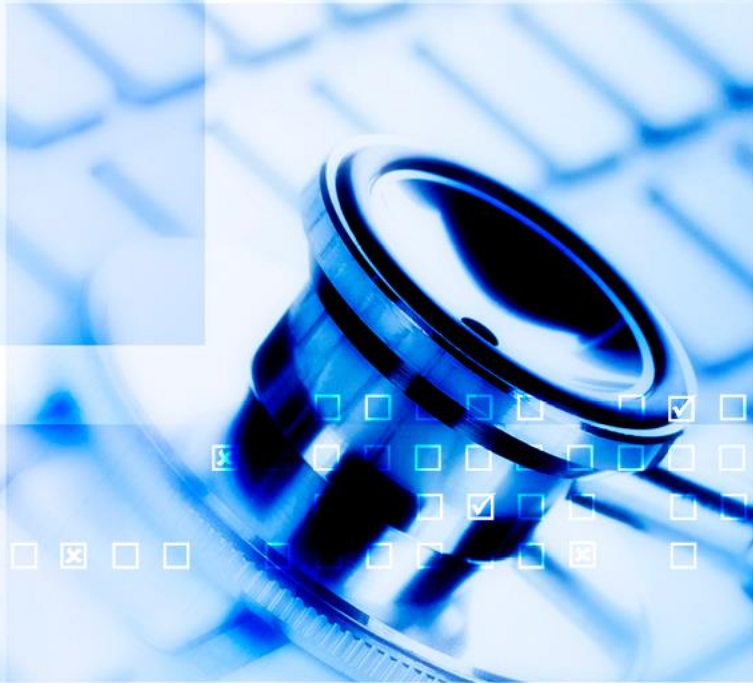

The Joanna Briggs Institute Critical Appraisal tools  
for use in JBI Systematic Reviews

# Checklist for Prevalence Studies

<http://joannabriggs.org/research/critical-appraisal-tools.html>

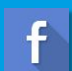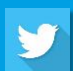

[www.joannabriggs.org](http://www.joannabriggs.org)



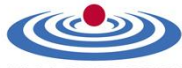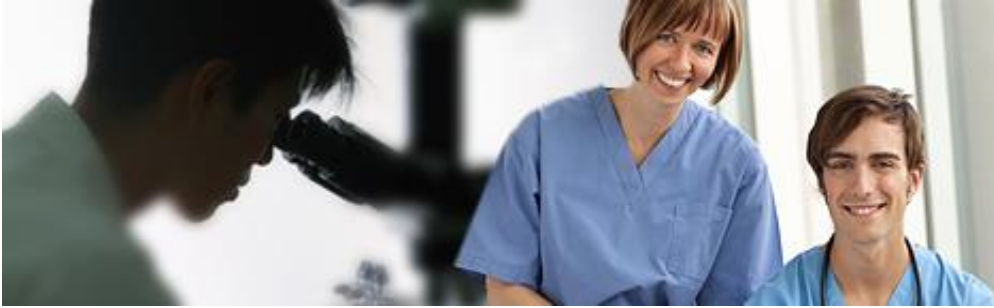

## The Joanna Briggs Institute

### Introduction

The Joanna Briggs Institute (JBI) is an international, membership based research and development organization within the Faculty of Health Sciences at the University of Adelaide. The Institute specializes in promoting and supporting evidence-based healthcare by providing access to resources for professionals in nursing, midwifery, medicine, and allied health. With over 80 collaborating centres and entities, servicing over 90 countries, the Institute is a recognized global leader in evidence-based healthcare.

### JBI Systematic Reviews

The core of evidence synthesis is the systematic review of literature of a particular intervention, condition or issue. The systematic review is essentially an analysis of the available literature (that is, evidence) and a judgment of the effectiveness or otherwise of a practice, involving a series of complex steps. The JBI takes a particular view on what counts as evidence and the methods utilized to synthesize those different types of evidence. In line with this broader view of evidence, the Institute has developed theories, methodologies and rigorous processes for the critical appraisal and synthesis of these diverse forms of evidence in order to aid in clinical decision-making in health care. There now exists JBI guidance for conducting reviews of effectiveness research, qualitative research, prevalence/incidence, etiology/risk, economic evaluations, text/opinion, diagnostic test accuracy, mixed-methods, umbrella reviews and scoping reviews. Further information regarding JBI systematic reviews can be found in the JBI Reviewer's Manual on our website.

### JBI Critical Appraisal Tools

All systematic reviews incorporate a process of critique or appraisal of the research evidence. The purpose of this appraisal is to assess the methodological quality of a study and to determine the extent to which a study has addressed the possibility of bias in its design, conduct and analysis. All papers selected for inclusion in the systematic review (that is – those that meet the inclusion criteria described in the protocol) need to be subjected to rigorous appraisal by two critical appraisers. The results of this appraisal can then be used to inform synthesis and interpretation of the results of the study. JBI Critical appraisal tools have been developed by the JBI and collaborators and approved by the JBI Scientific Committee following extensive peer review. Although designed for use in systematic reviews, JBI critical appraisal tools can also be used when creating Critically Appraised Topics (CAT), in journal clubs and as an educational tool.

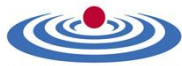

## JBI Critical Appraisal Checklist for Studies Reporting Prevalence Data

Reviewer\_\_\_\_\_Date\_\_\_\_\_

Author \_\_\_\_\_Year\_\_\_\_\_Record Number\_\_\_\_\_

|                                                                                                 | Yes                      | No                       | Unclear                  | Not applicable           |
|-------------------------------------------------------------------------------------------------|--------------------------|--------------------------|--------------------------|--------------------------|
| 1. Was the sample frame appropriate to address the target population?                           | <input type="checkbox"/> | <input type="checkbox"/> | <input type="checkbox"/> | <input type="checkbox"/> |
| 2. Were study participants sampled in an appropriate way?                                       | <input type="checkbox"/> | <input type="checkbox"/> | <input type="checkbox"/> | <input type="checkbox"/> |
| 3. Was the sample size adequate?                                                                | <input type="checkbox"/> | <input type="checkbox"/> | <input type="checkbox"/> | <input type="checkbox"/> |
| 4. Were the study subjects and the setting described in detail?                                 | <input type="checkbox"/> | <input type="checkbox"/> | <input type="checkbox"/> | <input type="checkbox"/> |
| 5. Was the data analysis conducted with sufficient coverage of the identified sample?           | <input type="checkbox"/> | <input type="checkbox"/> | <input type="checkbox"/> | <input type="checkbox"/> |
| 6. Were valid methods used for the identification of the condition?                             | <input type="checkbox"/> | <input type="checkbox"/> | <input type="checkbox"/> | <input type="checkbox"/> |
| 7. Was the condition measured in a standard, reliable way for all participants?                 | <input type="checkbox"/> | <input type="checkbox"/> | <input type="checkbox"/> | <input type="checkbox"/> |
| 8. Was there appropriate statistical analysis?                                                  | <input type="checkbox"/> | <input type="checkbox"/> | <input type="checkbox"/> | <input type="checkbox"/> |
| 9. Was the response rate adequate, and if not, was the low response rate managed appropriately? | <input type="checkbox"/> | <input type="checkbox"/> | <input type="checkbox"/> | <input type="checkbox"/> |

Overall appraisal:      Include ☐      Exclude ☐      Seek further info ☐

Comments (Including reason for exclusion)

---

---

---





## **JBI Critical Appraisal Checklist for Studies Reporting Prevalence Data**

*How to cite:* Munn Z, Moola S, Lisy K, Riitano D, Tufanaru C. Methodological guidance for systematic reviews of observational epidemiological studies reporting prevalence and incidence data. *Int J Evid Based Healthc.* 2015;13(3):147–153.

Answers: Yes, No, Unclear or Not/Applicable

### **1. Was the sample frame appropriate to address the target population?**

This question relies upon knowledge of the broader characteristics of the population of interest and the geographical area. If the study is of women with breast cancer, knowledge of at least the characteristics, demographics and medical history is needed. The term “target population” should not be taken to infer every individual from everywhere or with similar disease or exposure characteristics. Instead, give consideration to specific population characteristics in the study, including age range, gender, morbidities, medications, and other potentially influential factors. For example, a sample frame may not be appropriate to address the target population if a certain group has been used (such as those working for one organisation, or one profession) and the results then inferred to the target population (i.e. working adults). A sample frame may be appropriate when it includes almost all the members of the target population (i.e. a census, or a complete list of participants or complete registry data).

### **2. Were study participants recruited in an appropriate way?**

Studies may report random sampling from a population, and the methods section should report how sampling was performed. Random probabilistic sampling from a defined subset of the population (sample frame) should be employed in most cases, however, random probabilistic sampling is not needed when everyone in the sampling frame will be included/ analysed. For example, reporting on all the data from a good census is appropriate as a good census will identify everybody. When using cluster sampling, such as a random sample of villages within a region, the methods need to be clearly stated as the precision of the final prevalence estimate incorporates the clustering effect. Convenience samples, such as a street survey or interviewing lots of people at a public gatherings are not considered to provide a representative sample of the base population.

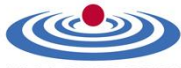

### 3. Was the sample size adequate?

The larger the sample, the narrower will be the confidence interval around the prevalence estimate, making the results more precise. An adequate sample size is important to ensure good precision of the final estimate. Ideally we are looking for evidence that the authors conducted a sample size calculation to determine an adequate sample size. This will estimate how many subjects are needed to produce a reliable estimate of the measure(s) of interest. For conditions with a low prevalence, a larger sample size is needed. Also consider sample sizes for subgroup (or characteristics) analyses, and whether these are appropriate. Sometimes, the study will be large enough (as in large national surveys) whereby a sample size calculation is not required. In these cases, sample size can be considered adequate.

When there is no sample size calculation and it is not a large national survey, the reviewers may consider conducting their own sample size analysis using the following formula: (Naing et al. 2006, Daniel 1999)

$$n = \frac{Z^2 P(1-P)}{d^2}$$

d<sup>2</sup>

Where:

n = sample size

Z = Z statistic for a level of confidence

P = Expected prevalence or proportion (in proportion of one; if 20%, P = 0.2)

d = precision (in proportion of one; if 5%, d=0.05)

#### Ref:

Naing L, Winn T, Rusli BN. Practical issues in calculating the sample size for prevalence studies Archives of Orofacial Sciences. 2006;1:9-14.

Daniel WW. Biostatistics: A Foundation for Analysis in the Health Sciences.

Edition. 7th ed. New York: John Wiley & Sons. 1999.

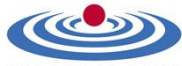

**4. Were the study subjects and setting described in detail?**

Certain diseases or conditions vary in prevalence across different geographic regions and populations (e.g. Women vs. Men, sociodemographic variables between countries). The study sample should be described in sufficient detail so that other researchers can determine if it is comparable to the population of interest to them.

**5. Was data analysis conducted with sufficient coverage of the identified sample?**

Coverage bias can occur when not all subgroups of the identified sample respond at the same rate. For instance, you may have a very high response rate overall for your study, but the response rate for a certain subgroup (i.e. older adults) may be quite low.

**6. Were valid methods used for the identification of the condition?**

Here we are looking for measurement or classification bias. Many health problems are not easily diagnosed or defined and some measures may not be capable of including or excluding appropriate levels or stages of the health problem. If the outcomes were assessed based on existing definitions or diagnostic criteria, then the answer to this question is likely to be yes. If the outcomes were assessed using observer reported, or self-reported scales, the risk of over- or under-reporting is increased, and objectivity is compromised. Importantly, determine if the measurement tools used were validated instruments as this has a significant impact on outcome assessment validity.

**7. Was the condition measured in a standard, reliable way for all participants?**

Considerable judgment is required to determine the presence of some health outcomes. Having established the validity of the outcome measurement instrument (see item 6 of this scale), it is important to establish how the measurement was conducted. Were those involved in collecting data trained or educated in the use of the instrument/s? If there was more than one data collector, were they similar in terms of level of education, clinical or research experience, or level of responsibility in the piece of research being appraised? When there was more than one observer or collector, was there comparison of results from across the observers? Was the condition measured in the same way for all participants?



**8. Was there appropriate statistical analysis?**

Importantly, the numerator and denominator should be clearly reported, and percentages should be given with confidence intervals. The methods section should be detailed enough for reviewers to identify the analytical technique used and how specific variables were measured. Additionally, it is also important to assess the appropriateness of the analytical strategy in terms of the assumptions associated with the approach as differing methods of analysis are based on differing assumptions about the data and how it will respond.

**9. Was the response rate adequate, and if not, was the low response rate managed appropriately?**

A large number of dropouts, refusals or “not founds” amongst selected subjects may diminish a study’s validity, as can a low response rates for survey studies. The authors should clearly discuss the response rate and any reasons for non-response and compare persons in the study to those not in the study, particularly with regards to their socio-demographic characteristics. If reasons for non-response appear to be unrelated to the outcome measured and the characteristics of non-responders are comparable to those who do respond in the study (addressed in question 5, coverage bias), the researchers may be able to justify a more modest response rate.

| name of auth      | year of publication | country    | target region | method of genotyping | TOTAL SUBJECTS | A1 |
|-------------------|---------------------|------------|---------------|----------------------|----------------|----|
| Saif et al        | 2017                | Bangladesh | S and C       | sequencing           | 45             | 9  |
| Tran et al        | 2008                | Cambodia   | C             | sequencing           | 12             | 0  |
| Dong.. et al      | 2021                | China      | S and C       | sequencing           | 636            | 0  |
| Jin et al         | 2010                | China      | X             | sequencing           | 179            | 0  |
| Li et al          | 2010                | China      | X             | sequencing           | 96             | 0  |
| Li. et al         | 2011                | China      | P and S       | sequencing           | 1290           | 0  |
| Nei et al         | 2012                | China      | S             | sequencing           | 470            | 0  |
| Shen et al        | 2015                | China      | P, S and C    | sequencing           | 37             | 0  |
| Su et al          | 2020                | China      | S             | sequencing           | 323            | 0  |
| Wang. et al       | 2014                | China      | S             | sequencing           | 45             | 0  |
| Xiang et al       | 2012                | China      | S             | sequencing           | 112            | 0  |
| Yan et al         | 2015                | China      | P and S       | multiplex PCR        | 247            | 0  |
| Yin et al         | 2010                | China      | S and C       | sequencing           | 2202           | 0  |
| Gollapudi et al   | 2008                | India      | S and C       | sequencing           | 10             | 7  |
| Andi et al        | 2009                | Indonesia  | S             | sequencing           | 171            | 0  |
| Wahyuni et al     | 2019                | Indonesia  | S             | sequencing           | 41             | 0  |
| Davod et al       | 2019                | Iran       | S, C and X    | sequencing           | 87             | 0  |
| Shahnaz et al     | 2018                | Iran       | S             | sequencing           | 26             | 0  |
| Hayashi et al     | 2007                | Japan      | P and S       | sequencing           | 242            | 0  |
| Hyun-Ju et al     | 2007                | Korea      | S             | sequencing           | 209            | 0  |
| Hudu et al        | 2018                | Malaysia   | S             | sequencing           | 75             | 0  |
| Pattaratida et al | 2010                | Thailand   | S and C       | sequencing           | 219            | 0  |
| Kaklikkaya et al  | 2012                | Turkey     | S             | RFLP                 | 125            | 0  |
| Ozdemir et al     | 2005                | Turkey     | S             | sequencing           | 54             | 0  |
| Sayan & Dogan     | 2012                | Turkey     | P             | sequencing           | 93             | 0  |
| Sunbul and Lale   | 2005                | Turkey     | P, S and C    | RFLP                 | 78             | 0  |
| Sunbul et al      | 2003                | Turkey     | S             | RFLP                 | 86             | 0  |
| Bui et al         | 2017                | Vietnam    | S and C       | sequencing           | 135            | 0  |
| Cuong et al       | 2011                | Vietnam    | S             | sequencing           | 112            | 0  |
|                   |                     |            |               |                      | 7457           | 16 |

| A5 | B1 | B2 | B3   | B4  | B5  | B7 |    |
|----|----|----|------|-----|-----|----|----|
|    | 0  | 0  | 0    | 0   | 0   | 0  | 0  |
|    | 0  | 0  | 0    | 0   | 4   | 0  | 0  |
|    | 0  | 1  | 118  | 7   | 7   | 0  | 2  |
|    | 0  | 0  | 10   | 0   | 0   | 0  | 0  |
|    | 0  | 0  | 35   | 0   | 0   | 0  | 0  |
|    | 0  | 0  | 182  | 0   | 0   | 0  | 0  |
|    | 0  | 0  | 63   | 0   | 0   | 0  | 0  |
|    | 0  | 26 | 0    | 0   | 0   | 0  | 0  |
|    | 0  | 0  | 162  | 2   | 2   | 0  | 0  |
|    | 0  | 0  | 0    | 0   | 0   | 0  | 0  |
|    | 0  | 0  | 85   | 0   | 0   | 0  | 0  |
|    | 0  | 0  | 92   | 0   | 0   | 0  | 0  |
|    | 0  | 2  | 601  | 6   | 2   | 0  | 0  |
|    | 0  | 0  | 0    | 0   | 0   | 0  | 0  |
|    | 0  | 0  | 5    | 107 | 1   | 5  | 8  |
|    | 0  | 0  | 0    | 35  | 0   | 0  | 0  |
|    | 0  | 0  | 0    | 0   | 0   | 0  | 0  |
|    | 0  | 0  | 0    | 0   | 0   | 0  | 0  |
|    | 30 | 8  | 0    | 0   | 0   | 0  | 0  |
|    | 0  | 0  | 0    | 0   | 0   | 0  | 0  |
|    | 0  | 0  | 37   | 0   | 13  | 0  | 0  |
|    | 0  | 0  | 8    | 9   | 8   | 0  | 0  |
|    | 0  | 0  | 0    | 0   | 0   | 0  | 0  |
|    | 0  | 0  | 0    | 0   | 0   | 0  | 0  |
|    | 0  | 0  | 0    | 0   | 0   | 0  | 0  |
|    | 0  | 0  | 0    | 0   | 0   | 0  | 0  |
|    | 0  | 0  | 0    | 0   | 0   | 0  | 0  |
|    | 0  | 0  | 12   | 0   | 86  | 0  | 0  |
|    | 0  | 0  | 1    | 0   | 0   | 90 | 0  |
|    | 30 | 37 | 1411 | 166 | 123 | 95 | 10 |

| B8 | C1 | C2   | C3   | C4 | C5 | C6 |   |
|----|----|------|------|----|----|----|---|
|    | 0  | 21   | 0    | 0  | 0  | 0  | 0 |
|    | 0  | 12   | 0    | 0  | 0  | 0  | 0 |
|    | 1  | 394  | 60   | 0  | 0  | 17 | 0 |
|    | 0  | 0    | 169  | 0  | 0  | 0  | 0 |
|    | 0  | 4    | 57   | 0  | 0  | 0  | 0 |
|    | 0  | 0    | 1096 | 0  | 0  | 0  | 0 |
|    | 0  | 0    | 407  | 0  | 0  | 0  | 0 |
|    | 0  | 0    | 0    | 0  | 0  | 11 | 0 |
|    | 0  | 27   | 93   | 3  | 6  | 4  | 2 |
|    | 0  | 10   | 28   | 0  | 0  | 3  | 0 |
|    | 0  | 0    | 27   | 0  | 0  | 0  | 0 |
|    | 0  | 30   | 125  | 0  | 0  | 0  | 0 |
|    | 0  | 236  | 1277 | 4  | 2  | 15 | 0 |
|    | 0  | 0    | 0    | 0  | 0  | 0  | 0 |
|    | 0  | 37   | 1    | 7  | 0  | 0  | 0 |
|    | 0  | 6    | 0    | 0  | 0  | 0  | 0 |
|    | 0  | 0    | 0    | 0  | 0  | 0  | 0 |
|    | 0  | 0    | 0    | 0  | 0  | 0  | 0 |
|    | 21 | 0    | 176  | 0  | 0  | 7  | 0 |
|    | 0  | 0    | 209  | 0  | 0  | 0  | 0 |
|    | 0  | 0    | 22   | 0  | 3  | 0  | 0 |
|    | 0  | 192  | 0    | 0  | 0  | 2  | 0 |
|    | 0  | 0    | 0    | 0  | 0  | 0  | 0 |
|    | 0  | 0    | 0    | 0  | 0  | 0  | 0 |
|    | 0  | 0    | 0    | 0  | 0  | 0  | 0 |
|    | 0  | 0    | 0    | 0  | 0  | 0  | 0 |
|    | 0  | 0    | 0    | 0  | 0  | 0  | 0 |
|    | 0  | 0    | 0    | 0  | 0  | 0  | 0 |
|    | 0  | 37   | 0    | 0  | 0  | 0  | 0 |
|    | 0  | 20   | 0    | 0  | 0  | 0  | 0 |
|    | 22 | 1026 | 3747 | 14 | 11 | 59 | 2 |

| C7 | C8 | C9 | C10 | C17 | D1 | D2  |     |
|----|----|----|-----|-----|----|-----|-----|
|    | 0  | 0  | 0   | 0   | 0  | 0   | 15  |
|    | 0  | 0  | 0   | 0   | 0  | 0   | 0   |
|    | 0  | 24 |     | 1   | 1  | 0   | 0   |
|    | 0  | 0  | 0   | 0   | 0  | 0   | 0   |
|    | 0  | 0  | 0   | 0   | 0  | 0   | 0   |
|    | 0  | 0  | 0   | 0   | 0  | 12  | 0   |
|    | 0  | 0  | 0   | 0   | 0  | 0   | 0   |
|    | 0  | 0  | 0   | 0   | 0  | 0   | 0   |
|    | 0  | 0  | 0   | 0   | 0  | 19  | 0   |
|    | 4  | 0  | 0   | 0   | 0  | 0   | 0   |
|    | 0  | 0  | 0   | 0   | 0  | 0   | 0   |
|    | 0  | 0  | 0   | 0   | 0  | 0   | 0   |
|    | 0  | 0  | 31  | 0   | 0  | 21  | 5   |
|    | 0  | 0  | 0   | 0   | 0  | 1   | 2   |
|    | 0  | 0  | 0   | 0   | 0  | 0   | 0   |
|    | 0  | 0  | 0   | 0   | 0  | 0   | 0   |
|    | 0  | 0  | 0   | 0   | 0  | 87  | 0   |
|    | 0  | 0  | 0   | 0   | 0  | 24  | 2   |
|    | 0  | 0  | 0   | 0   | 0  | 0   | 0   |
|    | 0  | 0  | 0   | 0   | 0  | 0   | 0   |
|    | 0  | 0  | 0   | 0   | 0  | 0   | 0   |
|    | 0  | 0  | 0   | 0   | 0  | 0   | 0   |
|    | 0  | 0  | 0   | 0   | 0  | 2   | 122 |
|    | 0  | 0  | 0   | 0   | 0  | 7   | 44  |
|    | 0  | 0  | 0   | 0   | 0  | 76  | 9   |
|    | 0  | 0  | 0   | 0   | 0  | 3   | 67  |
|    | 0  | 0  | 0   | 0   | 0  | 4   | 74  |
|    | 0  | 0  | 0   | 0   | 0  | 0   | 0   |
|    | 0  | 0  | 0   | 0   | 0  | 0   | 0   |
|    | 4  | 24 | 31  | 1   | 1  | 256 | 340 |



| D3 | D4 | D5 | D6 | D/Ddel |   |
|----|----|----|----|--------|---|
|    | 0  | 0  | 0  | 0      | 0 |
|    | 0  | 0  | 0  | 0      | 0 |
|    | 0  | 0  | 0  | 0      | 0 |
|    | 0  | 0  | 0  | 0      | 0 |
|    | 0  | 0  | 0  | 0      | 0 |
|    | 0  | 0  | 0  | 0      | 0 |
|    | 0  | 0  | 0  | 0      | 0 |
|    | 0  | 0  | 0  | 0      | 0 |
|    | 2  | 1  | 0  | 0      | 0 |
|    | 0  | 0  | 0  | 0      | 0 |
|    | 0  | 0  | 0  | 0      | 0 |
|    | 0  | 0  | 0  | 0      | 0 |
|    | 0  | 0  | 0  | 0      | 0 |
|    | 0  | 0  | 2  | 0      | 0 |
|    | 0  | 0  | 0  | 0      | 0 |
|    | 0  | 0  | 0  | 0      | 0 |
|    | 0  | 0  | 0  | 0      | 0 |
|    | 0  | 0  | 0  | 0      | 0 |
|    | 0  | 0  | 0  | 0      | 0 |
|    | 0  | 0  | 0  | 0      | 0 |
|    | 0  | 0  | 0  | 0      | 0 |
|    | 0  | 0  | 0  | 0      | 0 |
|    | 0  | 0  | 0  | 0      | 0 |
|    | 0  | 0  | 0  | 0      | 1 |
|    | 0  | 0  | 0  | 3      | 0 |
|    | 8  | 0  | 0  | 0      | 0 |
|    | 1  | 0  | 0  | 0      | 7 |
|    | 2  | 0  | 0  | 0      | 0 |
|    | 0  | 0  | 0  | 0      | 0 |
|    | 0  | 0  | 0  | 0      | 0 |
|    | 13 | 1  | 2  | 3      | 8 |
